# Supplementary material for: Computer templates in chronic disease management: ethnographic case study in general practice
Source: PubMed Central journal article supplement — BMJ Open. 2012 Nov 28;2(6):e001754. doi: 10.1136/bmjopen-2012-001754 (PMC3533031; doi:10.1136/bmjopen-2012-001754), 2012-11-28
Supplement: bmjopen-2012-001754.draft_revisions.pdf [file bmjopen-2012-001754.draft_revisions.pdf]

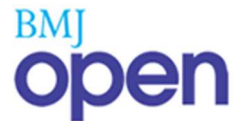

**Computer templates in chronic disease management:  
ethnographic case study in general practice**

|                                 |                                                                                                                                                                                                                                                                                                |
|---------------------------------|------------------------------------------------------------------------------------------------------------------------------------------------------------------------------------------------------------------------------------------------------------------------------------------------|
| Journal:                        | <i>BMJ Open</i>                                                                                                                                                                                                                                                                                |
| Manuscript ID:                  | bmjopen-2012-001754                                                                                                                                                                                                                                                                            |
| Article Type:                   | Research                                                                                                                                                                                                                                                                                       |
| Date Submitted by the Author:   | 02-Jul-2012                                                                                                                                                                                                                                                                                    |
| Complete List of Authors:       | Swinglehurst, Deborah; Queen Mary University of London, Centre for Primary Care and Public Health<br>Greenhalgh, Trisha; Queen Mary University of London, Centre for Primary Care and Public Health<br>Roberts, Celia; King's College London, Department of Education and Professional Studies |
| <b>Primary Subject Heading</b>: | General practice / Family practice                                                                                                                                                                                                                                                             |
| Secondary Subject Heading:      | Qualitative research                                                                                                                                                                                                                                                                           |
| Keywords:                       | Information management < BIOTECHNOLOGY & BIOINFORMATICS, Quality in health care < HEALTH SERVICES ADMINISTRATION & MANAGEMENT, PRIMARY CARE, QUALITATIVE RESEARCH, Organisation of health services < HEALTH SERVICES ADMINISTRATION & MANAGEMENT                                               |
|                                 |                                                                                                                                                                                                                                                                                                |

SCHOLARONE™  
Manuscripts

Original paper submitted to BMJ Open June 2012

## Computer templates in chronic disease management: ethnographic case study in general practice

Deborah Swinglehurst\* (corresponding author)  
NIHR Academic Clinical Lecturer

Trisha Greenhalgh\*  
Professor of Primary Health Care

Celia Roberts\*\*  
Professor of Applied Linguistics

\*Centre for Primary Care and Public Health, Queen Mary, University of London, 58 Turner Street, London E1 2AB

\*\* Department of Education and Professional Studies, King's College London, Franklin Wilkins Annexe, Waterloo Road, London SE1 9NN

Corresponding author: Deborah Swinglehurst  
Correspondence address:

p: as above

t: +44 20 7882 7204

f: +44 20 7882 2552

e: [d.swinglehurst@qmul.ac.uk](mailto:d.swinglehurst@qmul.ac.uk)

All authors have completed the Unified Competing Interest form at [http://www.icmje.org/coi\\_disclosure.pdf](http://www.icmje.org/coi_disclosure.pdf) (available on request from the corresponding author) and declare: no support from any organisation for the submitted work [or describe if any]; no financial relationships with any organisations that might have an interest in the submitted work in the previous three years [or describe if any], no other relationships or activities that could appear to have influenced the submitted work.

The Corresponding Author has the right to grant on behalf of all authors and does grant on behalf of all authors, an exclusive licence (or non exclusive for government employees) on a worldwide basis to the BMJ Publishing Group Ltd to permit this article (if accepted) to be published in BMJ editions and any other BMJ PGL products and sublicences such use and exploit all subsidiary rights, as set out in our licence

## **Abstract**

### **Objective**

To investigate how electronic templates shape, enable and constrain consultations about chronic disease.

### **Design**

Ethnographic case study, combining fieldnotes, video-recording, screen capture with micro-analysis of talk, body language and data entry – an approach called linguistic ethnography.

### **Setting**

Two general practices in England.

### **Participants and methods**

Ethnographic observation of administrative areas and 36 nurse-led consultations. 24 consultations directly observed; 12 consultations video-recorded, alongside computer screen capture. Consultations transcribed using conversation analysis conventions, with notes on body language and the electronic record. Analysis involved repeated rounds of viewing video, annotating fieldnotes, transcription, and micro-analysis, to identify themes. Data interpreted using discourse analysis, with attention to socio-technical theory.

### **Results**

Consultations centred explicitly or implicitly on evidence-based protocols inscribed in templates. Templates did not simply identify tasks for completion, but contributed to defining what chronic diseases were, how care was delivered and what it meant to be a patient or professional in this context. Patients' stories morphed into data bytes; the particular became generalised; the complex was made discrete, simple and manageable; and uncertainty became categorised and contained. Many consultations resembled bureaucratic encounters, primarily oriented to completing data fields. We identified a tension, sharpened by the template, between different framings of the patient – as 'individual' or as 'one of a population'. Some clinicians overcame this tension, responding creatively to prompts within a dialogue constructed around the patient's narrative.

### **Conclusions**

Despite their widespread implementation, little previous research has examined how templates are actually used in practice. Templates do not simply document the tasks of

1  
2  
3 chronic disease management but profoundly change the nature of this work. Designed to  
4 assure standards of 'quality' care they contribute to bureaucratisation of care and may  
5 marginalise aspects of quality care which lie beyond their focus. Creative work is required to  
6 avoid privileging 'institution-centred' care over patient-centred care.  
7  
8  
9  
10  
11  
12  
13  
14  
15  
16  
17  
18  
19  
20  
21  
22  
23  
24  
25  
26  
27  
28  
29  
30  
31  
32  
33  
34  
35  
36  
37  
38  
39  
40  
41  
42  
43  
44  
45  
46  
47  
48  
49  
50  
51  
52  
53  
54  
55  
56  
57  
58  
59  
60

For peer review only

## Summary

### **Article Focus**

- How do computer templates for chronic disease management shape, enable and constrain clinical consultations?
- How does the tension between different ways of framing the patient (patient as 'individual'; patient as 'one of a population') play out as clinicians use templates to support chronic disease management and meet institutional targets?

### **Key Messages**

- Electronic templates introduced to assure quality of care in chronic disease management may privilege the needs of the institution for data over the particular needs of individual patients
- Some but not all clinicians sustain a patient-centred approach through creative and flexible use of the template, while maintaining attention to the patient's narrative
- Linguistic ethnography offers potential for studying complex socio-technical practices in healthcare

### **Strengths and limitations of this study**

- Explores the *actual* social practices of working with templates at a level of detail which more conventional qualitative methods (e.g. interviews) cannot reach
- Adopts a novel methodological approach embracing the complexities of interaction between humans and technologies, whilst retaining a broad appreciation of institutional context
- Prompts new ways of conceptualising what is accomplished when templates are used
- We prioritised depth of analysis over breadth. However the two general practices we studied may not be typical of all practices in how they approach chronic disease management or technology use.

## Introduction

The electronic patient record underpins one of the cornerstones of chronic disease management, the “three Rs” of registration, recall and regular review.<sup>1</sup> Information technology is seen as key to a high-performing chronic care system.<sup>2</sup> It facilitates effective population management (e.g. disease registration and population risk stratification), supports communication between professionals, and provides data to inform the continuous quality improvement cycle.<sup>2</sup> Over 2000 primary studies, mostly randomised trials, have measured the impact of the electronic record on different aspects of care<sup>3</sup> but many had methodological flaws and questions remain about the circumstances in which the benefits of these technologies outweigh their limitations.<sup>4</sup> Nevertheless it is widely assumed that electronic records and related technologies will result in better care for patients and efficiency savings for clinicians.<sup>5</sup>

In many chronic diseases, clinical trials and cohort studies have produced robust evidence-based guidance on what works – and what may happen if particular conditions or risk factors go untreated.<sup>6</sup> In the UK, best practice in prevention, surveillance and therapy is summarised in patient pathways, guidelines and decision support algorithms which are routinely available on the clinician’s desktop computer as pull-down menus, pop-up prompts and templates (electronic forms).<sup>7</sup> These tools support structured management of individual patients (‘primary use’ of data) and also produce aggregated data on costs and/or organisational performance (‘secondary use’).<sup>8</sup> The latter may be linked to incentives, for example the UK Quality and Outcomes Framework (QOF).<sup>9</sup>

In the UK, six out of ten adults report having an incurable long-term condition; it is not unusual for an 80-year old to have five or six such conditions.<sup>7;10</sup> Concerns are emerging about fragmentation of care,<sup>11;12</sup> and the dangers of the ‘vertical’ disease-specific focus implied in translational research and in clinical guidelines.<sup>13</sup> What constitutes ‘best care’ for patients with multimorbidity is poorly understood<sup>14</sup> and has been identified as a priority area for further research.<sup>15</sup>

It is often said that “chronic diseases require a complex response”,<sup>10</sup> and that structured care, for example by using checklists or templates, is a mark of quality in chronic disease management. Templates have also been identified as a way of streamlining consultations and establishing routines.<sup>16</sup> Templates are formal tools which enable care to be undertaken systematically and which open up scope for manipulating, aggregating, transporting and sharing data. Although structured care and attempts to standardise clinical terminology pre-

1  
2  
3 dated the introduction of electronic records, these technologies introduce new possibilities  
4 for such care. For example, a quick search can identify not only the proportion of diabetic  
5 patients with an HbA1c below an institutionally defined target, but also which *particular*  
6 individuals have been given smoking advice (or not) within a defined time period (or at least  
7 the extent to which such activity has been documented). 'Off target' individuals can be  
8 identified quickly and in an automated way, triggering responses designed to 'chase'  
9 patients, and constructing a new category of 'patient' defined by the practice's procedures –  
10 that is, someone whose data fields are incomplete or whose values are out of range.<sup>17;18</sup>  
11  
12  
13  
14  
15

16  
17 From the patient's perspective, chronic illness is a unique personal experience which may  
18 involve pain, disability, loss of status, reduced income and a heroic struggle to retain dignity,  
19 rebuild identity and live a moral life in the face of adversity.<sup>19-22</sup> The consultation is an  
20 opportunity for the patient to tell their story to an involved listener<sup>23</sup> – who in turn shapes the  
21 telling and is witness to their suffering.<sup>24;25</sup> Constructing a narrative in the context of an  
22 ongoing therapeutic relationship is one way in which a patient makes sense of their  
23 illness.<sup>26;27</sup> Conceptualised this way, the consultation focuses on a patient's specific,  
24 particular experience – the 'here and now'. As Balint emphasised, continuity of care in the  
25 general practice relationship provides repeated opportunities for recounting the illness  
26 narrative, helping to build the therapeutic relationship.<sup>28</sup>  
27  
28  
29  
30  
31  
32

33  
34 The rationalisation of chronic disease management, guided by a limited set of coded entries  
35 on the electronic record exposes what some authors have termed a rationality-reality gap<sup>29</sup>  
36 or fatal paradox<sup>30</sup> between the inherently messy and unique nature of healthcare work and  
37 the standardisation of this work. Central to this paradox is a tension between different ways  
38 of framing the patient – the patient as an individual whose illness narrative is unique, and the  
39 patient as one of a population, all of whom need standardised management of the 'same'  
40 disease.<sup>31</sup>  
41  
42  
43  
44

45  
46 In this study, we sought to address two questions. First, how do computer templates for  
47 chronic disease management shape, enable and constrain clinical consultations? Second,  
48 how does the tension between different ways of framing the patient (patient as 'individual';  
49 patient as 'one of a population') play out as clinicians draw on these templates to support  
50 such consultations and meet institutional targets? We adopted a socio-technical approach,  
51 meaning we focussed on the dynamic, contingent interaction between humans and  
52 technologies rather than assuming technologies are 'causal' of specific effects.<sup>32-34</sup>  
53  
54  
55  
56  
57  
58  
59  
60

## Methods

The study was part of the Healthcare Electronic Records in Organisations (HERO) study, funded by the UK Medical Research Council under a 'new methodologies' call which highlighted the limitations of experimental studies for certain research questions. Details of governance and ethical approval for the study have been published<sup>35</sup> and the methods used in this part of the HERO study have been described in detail elsewhere and summarised briefly here.<sup>31</sup>

DS (a general practitioner) conducted 8 months (187 hours) of ethnographic observation in two UK general practices, in clinical and administrative areas. The practices served mixed populations of approximately 11800 and 12600 patients respectively, both used the EMIS-LV clinical system (the most widely used system in the UK) and both practices scored highly in the Quality and Outcomes Framework.

Observations began in what the sociologist Erving Goffman's called the 'backstage'<sup>36</sup> regions of practice (that is, areas which are not usually 'patient facing' e.g. administrative offices), shadowing individuals as they worked. The researcher made detailed fieldnotes and elicited narratives from staff, seeking to identify "*What is being accomplished here?*" Documents (e.g. recall letters, patient leaflets) relevant to chronic disease management were collected. This naturalistic approach seeks to generate in-depth knowledge about how and why people behave as they do in particular settings, whilst minimising the impact of the researcher.<sup>37</sup> Observation then moved to the 'front stage' – that is, the main focus of clinician-patient communication – the clinical consultation.<sup>36</sup> 24 chronic disease management consultations were observed, then 12 were video-recorded, with parallel screen capture of the computer display. The two video streams were merged and synchronised using video editing software (Adobe® Premier Elements 4) allowing us to observe the 'electronic record-in-use'. Recording began when the record was accessed (often several minutes before the patient entered the room).

Our work is a contribution to an emerging field called 'linguistic ethnography' bringing together a focus on language – in this case a microanalysis of the unfolding consultation – with ethnographic appreciation of the wider institutional context.<sup>38</sup> It is underpinned by a social constructionist perspective, that is to say language (which incorporates actions as well as words) does not just reflect or express intentions or decisions (the *representational* role of



1  
2  
3 language) but *makes* them (the *constitutive* role of language) – talk *is* work.<sup>39</sup> Our frame of  
4 reference is interpretivist; we seek to explore the meaning-making of our research  
5 participants as they engage in the actual practices of chronic disease management.  
6  
7

8  
9 Our iterative approach to data transcription, annotation and analysis is shown in Figure 1.  
10 Fieldnotes were annotated, and videos viewed multiple times. Transcription incorporated  
11 Jefferson conventions for the spoken word (as in conversation analysis – see Appendix),<sup>40</sup> to  
12 which we added a simple horizontal arrow (→ or ↔) to indicate direction of gaze, notes on  
13 bodily conduct, and notes on the electronic record, using time as an anchor.<sup>41</sup> We mapped  
14 consultations and conducted a detailed micro-analysis of the moment-by-moment unfolding  
15 of the interactions. This included paying attention to the *material* features of the EPR (e.g.  
16 screen, keyboard) and the *textual* features (displayed medical information, prompts, alerts,  
17 fields for completion). We identified *focal* themes relevant to the professional domain (such  
18 as agenda setting) and *analytic* themes (from linguistics and sociology) such as Goffman's  
19 notion of 'involvement'.<sup>39</sup> Goffman defines involvement as sustaining "*cognitive and affective*  
20 *engrossment*" in an activity, or the "*mobilization of one's psychobiological resources*" (page  
21 36).<sup>23</sup>  
22  
23  
24  
25  
26  
27  
28

29  
30 [FIGURE 1 ABOUT HERE]  
31  
32  
33

## 34 **Results**

35  
36 The dataset comprised over 400 pages of ethnographic fieldnotes (of which around 15%  
37 related directly to chronic disease management) and 12 video-recordings with screen  
38 capture (of a total of 54 recordings incorporating all aspects of general practice). Below, we  
39 illustrate our findings with selected data extracts and accompanying analysis, drawn from a  
40 variety of sources including ethnographic fieldnotes, transcripts and practice documents.  
41  
42  
43  
44

### 45 **The electronic record shapes how disease is defined**

46  
47 In both practices, chronic disease management was organised so that each of a patient's  
48 chronic diseases resulted in a different occasion for care, often with a different nurse using a  
49 different template. This arrangement assumed that patients (and nurses) could distinguish  
50 features of one chronic disease from another in the face of multiple morbidities. A common  
51 way for the nurse to frame the purpose and scope of the consultation was to use statements  
52 such as "*how have things been from the diabetes point of view?*", or more simply  
53 "*so...asthma review*". To use Goodwin's terminology, these questions do the work of  
54 establishing what is 'figure' (relevant, salient) and what is 'ground' (less relevant to the  
55  
56  
57  
58  
59  
60

1  
2  
3 enquiry).<sup>42</sup> Only occasionally was this separation of the patient into different chronic  
4 diseases identified as potentially problematic. An example is shown in Box 1.  
5  
6

7 [INSERT BOX 1 ABOUT HERE]  
8

9  
10 The nurse's statement (Box 1) "*I know you have a lot of other things going on but we've*  
11 *called you in to look at your heart*" performs two contrasting functions. On the one hand she  
12 acknowledges the difficulty inherent in separating out his 'heart' problem from his other  
13 illnesses and wider experience, making it legitimate for the patient to frame his heart  
14 problems in a broader context. However, in the next part of her utterance "*but we've called*  
15 *you in to look at your heart*" she exhibits what discourse analysts call a 'scale jump'.<sup>43</sup> She  
16 shifts quickly from an individual, unique 'here and now' framing ("*I know you have...*") to a  
17 more general institutional framing ("*we've called you in...*"). This shift indexes what is most  
18 relevant and implies certain limits around what may happen in this consultation.  
19  
20  
21  
22  
23

24  
25 The patient responds by juxtaposing his prime concerns with the 'core' concerns of this  
26 clinic. First, he rarely uses his angina tablet – but only because his mobility problems  
27 outweigh his angina. Then his concern about simvastatin moves swiftly into a complaint  
28 about his hearing aids. Neither mobility nor deafness are pursued by the nurse (or recorded  
29 on the electronic record); they are 'unremarkable' problems in this (heart) clinic. It is not  
30 simply that these concerns remain unexplored *because* there is no field dedicated to them in  
31 the template. More subtly, the practice of using a template shapes how disease and illness  
32 experience are made sense of in this environment.  
33  
34  
35  
36  
37

38  
39 The template is not merely organised around a single disease entity, but around a particular  
40 *version* of this disease. For example, diabetes in all its complexity is rationalised in terms of  
41 a series of codes e.g. weight, units of alcohol, blood pressure, lower limb pulses (present or  
42 absent) – with minimal (if any) supporting free text. The primacy of the 'measurable' was  
43 often made explicit in the consultation. For example, three minutes into a diabetes  
44 consultation, one nurse faced the computer screen as she announced "*CAN WE DO a few*  
45 *measurements today then just to see (0.2) uhm where everything is*". Here, not only are  
46 "*measurements*" equated with what is to be recorded on the electronic record, but it is  
47 implied that they will reveal "*everything*". Another nurse – in an asthma clinic – remarked (as  
48 a patient moved to leave) "*Hang on a minute. I need to pop these in here* (turning to  
49 computer)...*this is a whole set of measurements which tells us where your lungs are now*".  
50  
51  
52  
53  
54  
55  
56  
57  
58  
59  
60

1  
2  
3 Nurses frequently engaged in the kind of activities which characterise bureaucratic  
4 encounters.<sup>44</sup> For example, deviations from the institutional agenda were brief; patients' talk  
5 was interpreted in direct relation to the template (an example of an institutional script, or a  
6 particular way of accounting for practices);<sup>45</sup> and talk was steered in particular institutionally-  
7 relevant directions. For example, in Table 1, from a diabetic clinic, the nurse anticipates an  
8 upcoming field in the template ('Depression Screening'). At the time, the Quality and  
9 Outcomes Framework required case finding for depression amongst diabetic patients, using  
10 two standard questions (*During the last month have you often been bothered by feeling*  
11 *down, depressed or hopeless? During the last month, have you often been bothered by*  
12 *having little interest or pleasure in doing things?*) Although we observed no examples of this  
13 precise wording being used, nurses often incorporated their own versions, enquiring about  
14 the 'mood' or feeling 'down'. The transcript in Table 1 shows the nurse's handling of these  
15 questions. In this extract she refers back to a brief account of whiskey drinking, which the  
16 patient had offered about seven minutes earlier:  
17  
18  
19  
20  
21  
22  
23  
24

25  
26 Patient: "well I look a- I look after myself I drink whiskey to counteract the cigarettes y'know"

27 Nurse: "do you [laugh] a whiskey a day?"

28  
29 Patient: "yeh"  
30  
31

32 [INSERT TABLE 1 ABOUT HERE]  
33  
34

35 In Table 1, the question "*Does the diabetes get you down Mr C?*" is met by a relatively long  
36 pause (in conversational terms). The patient frowns and says he gets "*bored with life*"  
37 widening the perspective towards his broader life experience. The nurse responds with a  
38 question which invites elaboration, but simultaneously refocuses on a narrow diabetes-  
39 relevant cause (*the food*). This is an awkward moment and prompts the patient to withdraw  
40 his gaze, laugh ironically, lift his jumper and say, quietly "*ah well never mind*" –  
41 communicating disappointment. A brief but poignant narrative unfolds, painting a picture of a  
42 man who has reluctantly made lifestyle changes, restricting his enjoyment of life. Being a  
43 "*drinking man*" was part of his (male) identity and conjures up a social life around alcohol  
44 ("*when I had to give up the beer I had to give up an awful lot of other things:*"). At 19.11 the  
45 nurse slows and quietens her speech, perhaps encouraging elaboration, but the narrow  
46 biomedical focus of the template items is restored from 19.13 onwards, the patient justifying  
47 his whiskey by reference to its minimal 'sugar' content, which the nurse re-contextualises  
48 into even more 'scientific' terms – 'carbohydrates' and 'volumes'.  
49  
50  
51  
52  
53  
54  
55  
56  
57  
58  
59  
60

1  
2  
3 After the patient leaves, the nurse corrects the 'alcohol' record she had entered earlier. She  
4 replaces "14U" (copied from the previous year's entry in the template) with "7U". "A whiskey  
5 a day?" becomes 'one unit', in what is an uncritical shift from an *unquantified* volume of  
6 whiskey to an (apparently) *quantified* one. The complex interactions between the patient's  
7 diabetes, his identity as a "*drinking man*", his losses and his "*boredom with life*" are reduced  
8 to an institutional account which reads simply (and potentially misleadingly): "Depression  
9 screen – 'Y'; Alcohol – 7 units". The construction of particular versions of diabetes  
10 contributes to constructions of particular kinds of patient, discussed further below.  
11  
12  
13  
14

### 15 16 17 **The electronic record shapes how care is delivered**

18 The electronic record shapes care delivery in several ways. It is often the prompt to care,  
19 defined by 'overdue diary entries', overdue 'medication review' dates, and audits by a tool  
20 called 'Population Manager' identifying patients with missing QOF data ("*we've called you in*"  
21 – Box 1). Patients attend regularly, or may sign disclaimers, in a process which is institution-  
22 led, rather than patient-initiated. For example, in one practice letters of invitation to the  
23 'cardiovascular check up' were signed off by '*Practice Administration*' (not a clinician) and  
24 couched in institutional terms ("*We are now regularly reviewing all patients who have angina*  
25 *or who have had a heart attack. As a result of this we would like you to attend a health*  
26 *check...[further details]. There is no need to be concerned about this appointment we are*  
27 *just striving to maintain the standards of care we provide for you.*") The potential benefit to  
28 the patient is implicit and abstract rather than explicit and specific. For example, the  
29 justification for the check is presented only in terms of '*maintaining the standards*' or '*regular*'  
30 procedure. Despite receiving written invitations, patients often remained confused about why  
31 they had been summoned ("*What do you want to see me about then?*").  
32  
33  
34  
35  
36  
37  
38  
39

40 The requirement for data was – occasionally – the primary reason for the consultation. In  
41 one cardiovascular clinic a patient began by apologising for telephoning three days earlier to  
42 check whether her review was necessary. She had been reviewed in the hospital cardiology  
43 clinic the same week. The nurse responded by explaining that the practice is not always sent  
44 the information by the hospital "*and we have to have our records up to date*" – an explicit  
45 and unapologetic bureaucratisation of care. The 'need' for data seemed to outweigh any  
46 need that this particular patient felt (or necessarily had) for care.  
47  
48  
49  
50

51 The electronic record also shapes and constrains how the consultation unfolds moment-by-  
52 moment. Chronic disease consultations often (though not always) took a linear and  
53 standardised format. Consultations tended to start and finish with the same questions, and  
54 focus on information gathering and documentation. One consultation was interrupted on two  
55  
56  
57  
58  
59  
60

1  
2  
3 occasions by the patient standing up to take his leave, the nurse advising “*You can’t go yet*  
4 *(laughing) ...we’re not finished yet*”. It was common for nurses to face the computer screen  
5 as they explained the reason for ‘calling the patient in’, and the ‘orderliness’ of the clinic was  
6 often made explicit (e.g. “*We’ll start with your blood pressure*”). Table 2 shows a detailed  
7 transcript revealing this institutional ordering in an asthma clinic.  
8  
9

10  
11  
12 [INSERT TABLE 2 ABOUT HERE]  
13  
14

15 In this example (Table 2), the nurse frames the consultation as an *assessment*, firstly to see  
16 how “*your asthma’s doing*” (an assessment of the asthma) which she then reformulates as  
17 “*what you’re doing with it when it’s good, what you do with it when it’s bad*” (an assessment  
18 of the patient’s practices). This metaphorical separation of disease from patient was  
19 common. The use of the word “*assessment*” sets an evaluative tone and anticipates an  
20 enquiry which incorporates smoking status, inhaler technique, concordance with medication  
21 and peak flow measurement. The nurse emphasises (1:08 and 1:19) that it is *really* or *very*  
22 straightforward, and at 1:13 she counts on her fingers a three-part list, flagging the linearity  
23 of what is to follow and setting out what she and the patient should achieve. It might be  
24 interpreted as reassurance, but this is a reassurance about what he may expect of the  
25 *structure* of the clinic, not that his specific concerns will be addressed. Following this data  
26 extract, the nurse gestures towards the computer as she explains “*What I’ve got here is*  
27 *some questions that I – I need to ask you...they’re fairly straightforward ones but what they*  
28 *tend to do with is that they will flag up whether there >actually< we have got what w- what I*  
29 *would call breakthrough symptoms.*” The institutional imperative is clear (“*I need to ask you*”)  
30 and again she highlights the “*straightforward*” nature of the task, as she identifies the  
31 template as the origin of the questions. As the patient begins to demonstrate his inhaler use,  
32 he coughs loudly five times, beats his chest demonstrably with his hand and announces:  
33  
34  
35  
36  
37  
38  
39  
40  
41  
42  
43  
44  
45  
46  
47  
48  
49  
50  
51  
52

43 Patient: “*I do suffer very badly from phlegm in the mornings...which I presume is part*  
44 *and parcel of having asthma.*”

45 Nurse: “*It can be (.) yeah which (0.4) anyway I – we’ll talk about that in a*  
46 *minute...we’ll do the inhaler first.*”  
47  
48  
49  
50  
51  
52

53 Despite weaving his own concerns into the assessment of ‘inhaler technique’ and using  
54 elaborate gestures for emphasis, the nurse steers the patient’s activity back to the  
55 institutional script and does not revisit the issue of the morning phlegm. She later goes on to  
56  
57  
58  
59  
60

1  
2  
3 enquire specifically about asthma symptoms, but not until almost 16 minutes into the 19  
4 minute consultation...when prompted by a template field reading “night symptoms”.

### 7 **The electronic record shapes what it means to be a patient**

8 The template contributes to the construction of ‘institutional’ versions of the patient and may  
9 make it difficult for professionals to retain a perspective on the unique individual. One nurse  
10 said that the structure can make it difficult to “*take a step back*” – that some patients return  
11 annually for asthma checks even though she wonders whether they are definitely asthmatic  
12 at all (“*once they have acquired a diagnosis they just keep coming back*”). Whilst the asthma  
13 clinic may seem a reasonable setting in which to review a patient whose diagnosis is  
14 provisional or uncertain, the template does not handle such ambiguity well, and the recall  
15 procedures behind it can lead to the ‘production’ of consultations and the production of  
16 patienthood (the ‘asthma patient’). There is considerable scope for unhelpful, potentially  
17 incorrect labelling of patients. An example is shown in the ethnographic fieldnotes in Box 2.  
18  
19  
20  
21  
22  
23  
24

25 [INSERT BOX 2 ABOUT HERE]  
26  
27

28 Putting aside the absurdity that a 2-year-old has a Read code for “Never smoked tobacco” in  
29 his record, the example in Box 2 shows the disparity between the individual narrative that  
30 was built in the clinic and the “minimum data set” in the institutional account.<sup>46</sup> It also shows  
31 how the expressed ambiguity about the asthma diagnosis is wiped out (and not alluded to) in  
32 the record – numerous asthma Read codes are entered. Whilst this is sure to result in  
33 regular invitations to the clinic, the institutional ‘truth’ bears little resemblance to the reality it  
34 seeks to record. The contrast between the mother’s relief at the *uncertainty* of the diagnosis,  
35 and the *certainty* which was constructed in the record is striking. More subtle, transient  
36 moments of ambiguity, which required the shaping of patients’ accounts into an inflexible  
37 (often binary) categorisation, were common (e.g. a patient’s hesitant ‘not really’ becomes  
38 ‘no’).  
39  
40  
41  
42  
43  
44  
45

### 46 **The electronic record shapes what it means to be a clinician**

47 The opportunity for nurses to develop new areas of expertise in chronic disease  
48 management is frequently described in terms of ‘role-expansion’, ‘professional  
49 empowerment, or “*Liberating the Talents*”.<sup>47</sup> As the disease areas covered by the Quality  
50 and Outcomes Framework have increased, so has the variety of nurse-led, disease-specific  
51 consultations on offer. In this study, nurses were often defined by chronic disease speciality.  
52 For example, in one practice, photographs of the nurses in the waiting room had their  
53 disease-specific expertise listed alongside (e.g. Christine - Asthma). One practice newsletter  
54  
55  
56  
57  
58  
59  
60

1  
2  
3 read: “*Our practice nurses receive special training to monitor people with chronic diseases*  
4 *and to carry out many procedures independent of doctors.*” This entry not only constructs  
5 chronic disease as ‘nursing work’ but describes a ‘monitoring’ role which sounds different to  
6 the ‘care’ we may traditionally associate with nurses looking after the chronically sick. With  
7 nurses thus defined, general practitioners took on the role of ‘trouble-shooter’ or  
8 consultant,<sup>48</sup> called upon when more complex problems arose. In one practice, healthcare  
9 assistants conducted cardiovascular and hypertension reviews. Although able to gather  
10 information needed to *inform* chronic disease management (e.g. blood pressure, details of  
11 smoking) healthcare assistants are not clinically qualified. This ‘redistribution’ of chronic  
12 disease management to the least qualified (and least costly) team member has been  
13 previously described and shifts the meaning of the term ‘management’ towards one of  
14 managing data rather than patients.<sup>18;48</sup>

15  
16  
17  
18  
19  
20  
21  
22  
23 The extensive use of templates as a way of delivering chronic disease managements was  
24 rarely questioned. The little that was said was broadly positive, and echoed the “monitoring”  
25 perspective conveyed in the newsletter (“*templates encourage us to get to grips with the*  
26 *management of microalbuminuria in diabetes and take a more aggressive stance towards*  
27 *blood pressure control*”). Several nurses suggested they relied on templates and might  
28 easily forget things without them. However, one nurse said she tried to avoid relying too  
29 heavily on the template, as doing so tended to result in her “*losing her train of thought*”; she  
30 preferred to jot notes on paper to add to the template later. Some specific difficulties were  
31 voiced, such as the perception that important things may not be documented “*because there*  
32 *is nowhere in the template to put it*”, and “*you sometimes become so absorbed in the*  
33 *template that you can miss what is right in front of you in the patient.*” On one occasion  
34 when the computer crashed midway through a cardiovascular check, the nurse apologised in  
35 advance (“*I’ll have to do it a little out of order because I’ve no computer*”) and again  
36 afterwards (“*I’m sorry it’s been such a higgledy-piggledy consultation*”). This incident  
37 highlighted the extent to which her work had become interwoven with technology use. It  
38 seems unlikely that this senior, experienced nurse could not do a cardiovascular check  
39 without the prompts before her eyes. Rather it was because her embodied practices had  
40 become so finely tuned to incorporate the technology that to conduct a consultation without  
41 had become almost impossible.

42  
43  
44  
45  
46  
47  
48  
49  
50  
51  
52  
53 In one practice, an information technology manager was responsible for developing and  
54 maintaining computer templates, and he identified templates as a fundamental characteristic  
55 of quality care. A private company who had recently taken over the management of a local  
56 ‘underperforming’ practice was employing one of his GP colleagues to improve practice  
57  
58  
59  
60

1  
2  
3 systems. He explained that “*they were very impressed with our templating*”; the doctor had  
4 duly provided copies of their templates for the ‘underperforming’ practice. The integration of  
5 templates (and a new word – “*templating*”) was presented not only as a *feature* of good  
6 practice, but as potentially constitutive of good practice in an organisation which was  
7 otherwise failing – a transferable ‘good’.  
8  
9

10  
11  
12 The template contributed to redefining ‘professional vision’<sup>42</sup> by encouraging particular ways  
13 of looking, categorising and sense-making, fostering a particular orientation to the world. For  
14 example areas of institutional relevance (such as those which attract points in the Quality  
15 and Outcomes Framework) were often privileged over patients’ more immediate concerns.  
16 The template shaped not only *what* was relevant to record, but also *how* this was recorded.  
17 For example symptoms were recorded as either ‘present’ or ‘absent’ when patients  
18 described a much more complex reality. The clarification of a patient’s experience ‘in  
19 general’ was sought more readily than ‘particular’ experiences. The template brought new  
20 definitions of nursing and GP work, new conceptualisations of practice and new  
21 appreciations of what constituted ‘good’ practice.  
22  
23  
24  
25  
26  
27  
28

### 29 **Using the template creatively**

30 Some nurses displayed exceptional creativity in how they used the template. We illustrate  
31 this by reference to Tables 3 and 4 which show two extracts from a single consultation in the  
32 asthma clinic. In this consultation, the patient can see the screen if he turns his head slightly,  
33 but the nurse does not start to complete the template until ten minutes into the consultation.  
34 Until then, she faces him across the corner of the desk, occasionally jotting notes on a paper  
35 placed between them.  
36  
37  
38  
39  
40

41 [INSERT TABLE 3 ABOUT HERE]  
42  
43

44 The nurse uses several strategies to elicit a narrative at the outset (Table 3) beginning with  
45 an open invitation “*tell me ...*” The word “*tell*” invites a story, and she shifts into a posture  
46 displaying readiness to listen, moving her chair away from her desk (and the computer and  
47 her notes). The patient hesitates and there are some relatively long pauses in his telling, but  
48 she refrains from filling these with anything other than tokens of attentiveness. She mirrors  
49 the patient’s laugh and shrug of the shoulders from 1:10 to 1:15 in a way which is effective in  
50 encouraging him to tell some more.  
51  
52  
53  
54  
55

56 She goes on to encourage the patient to describe his inhaler use, and learns that he had  
57 recently woken up short of breath. His inhaler had not worked well and he could not get back  
58  
59  
60



1  
2  
3 to sleep. She makes occasional notes, describes aloud what she is noting, then summarises  
4 the story which the patient confirms. Having established some confusion over when he  
5 should be using each of his two inhalers, she uses a picture of the respiratory tract as part of  
6 her explanation, saying “*I think if you know how the drug works on your body it makes sense*  
7 *how to use them.*” She goes on to check his height and peak flow rate, then joins him (“*let’s*  
8 *have a look*”) as they cluster around the peak flow meter, each holding one end of it. The  
9 nurse says that it wasn’t very good and that he can do better – which makes him laugh –  
10 then she demonstrates how to do it. After his second attempt they again cluster round the  
11 peak flow meter (N: “*tha::t was a bit bette::r ...LOOK four hundred a::nd eighty.*”) After a  
12 further attempt the nurse says “*Excellent. Well done. What we got? There we go. LOOK five*  
13 *hundred and thirty that time.*”  
14  
15  
16  
17  
18  
19

20  
21 The nurse and patient are fully involved in this activity, in Goffman’s sense of being both  
22 cognitively and affectively engaged.<sup>23</sup> The nurse’s talk is inclusive (*let’s, we, what we got,*  
23 *there we go*) and her bodily conduct encourages a joint engagement in reading the peak  
24 flow meter. Having already created a collaborative environment, she turns to the computer  
25 for the first time almost ten minutes into the consultation (Table 4, 10.37).  
26  
27  
28  
29

30 [INSERT TABLE 4 ABOUT HERE]  
31  
32

33 Again the nurse uses inclusive language as she orients towards the screen, inviting the  
34 patient to look. Between 10:39 and 10:43 she makes a deliberate show of navigating  
35 towards the asthma template. She enters his height, points at the screen, makes a joke. By  
36 making the template deliberately visible and socialising around it she retains control over the  
37 progress of the consultation and legitimises her need to attend to some institutional work.  
38 But by involving the patient in the recording activity (not literally, but through making it a  
39 shared endeavour and using much inclusive language) she effectively maintains a patient-  
40 centred approach whilst briefly attending to institutional requirements.  
41  
42  
43  
44  
45  
46

47 She invites further collaboration in making the template entry at 11:14 onwards (*five thirty*  
48 *was your best wasn’t it*). The patient does not initially respond although he continues  
49 watching the screen. The computer automatically displays his “predicted peak flow rate  
50 (PEFR)”. The nurse evaluates the measurement as a “*little bit under...but not too bad*”,  
51 minimising any sense of trouble. But the mismatch between his ‘actual’ and his ‘predicted’  
52 result prompts the nurse to reformulate her question to one which is more demanding of an  
53 answer (“*was five thirty your best?*”) When the patient hesitates and suggests it may have  
54 been higher, the nurse suggests a recheck. This confirms the measurement, but the act of  
55  
56  
57  
58  
59  
60

1  
2  
3 repeating it displays a collaborative approach. Neither nurse nor patient's account is taken  
4 as 'truth' – a re-measurement settles the matter. In summary, this nurse is successful in  
5 eliciting a narrative, whilst also making the bureaucratic requirements deliberately visible.  
6 She skilfully minimises the distance between 'individual' and 'institutional' framings of the  
7 patient.<sup>31</sup>  
8  
9

10  
11  
12 A different nurse described herself as a "*paper person*" and yet also used the words  
13 "*template driven*" to describe her work. She said she had found it impossible to combine  
14 "*getting through it all*" with what she regarded as a patient-centred approach. She had  
15 negotiated with her employing doctors that her diabetes appointments were 30 minutes long  
16 (instead of 15 minutes) "*otherwise I would have just been completing the boxes with no time*  
17 *for the patient*". In this statement she highlighted a perceived gap between the task of being  
18 "for" the patient and the demands of the template. This nurse went to great lengths to  
19 minimise her need to look at the computer during her consultations, seizing brief  
20 opportunities as they arose (e.g. as patients removed socks, for example). She often placed  
21 her left hand on the patient's arm as she rotated her chair to look at the screen, keeping it  
22 there as she typed with her right hand – an awkward posture, but one which allowed her to  
23 maintain a physical connection to the patient as she attended to the template. She always  
24 went into surgery thirty minutes before her clinic was due to start, to prepare a written page  
25 of notes for each patient in her notebook. She meticulously studied the record of each  
26 patient she was anticipating, and copied blood results and other information she thought she  
27 may need to refer to. She 'knew' the template, and would frequently anticipate the next field  
28 in the template before displaying it on the screen, weaving it into the consultation whilst  
29 keeping it relatively 'invisible' to patients.  
30  
31  
32  
33  
34  
35  
36  
37  
38  
39  
40

41 In sociological terms, this particular nurse had internalised the template – working *with it* in a  
42 symbolic sense, but marginalising it from her embodied activity in the interaction. Her  
43 performed identity was as a 'paper person' who preferred to be "for" the patient in this new  
44 template-oriented 'field'<sup>49;50</sup> of practice, but the template was indeed central to her practice  
45 (she was "template driven"). She was 'driven' in the sense that she ensured that she  
46 completed it – as demanded by the institution – but also 'driven' to find creative ways of  
47 working around it. It had become part of a new professional habitus,<sup>49;50</sup> which helped to  
48 define her normative behaviours and expectations. She took the burden of managing the  
49 individual / institutional tension, but in this case it came at an opportunity cost to herself in  
50 terms of personal time, and a financial cost to her employer (since her consultations were  
51 now taking twice as long).  
52  
53  
54  
55  
56  
57  
58  
59  
60

## Discussion

### Summary of findings

In this paper we have focussed on the detailed practices of using computer templates in chronic disease management in UK general practice. In particular, we have highlighted the tension between different ways of framing the patient, and the requirement on clinicians (nurses especially) to sustain a dual orientation to both individual patient and institutional imperatives. This pressure to 'fit' unique individuals into institutional 'boxes' or to weave a bureaucratic process through a personal encounter<sup>18;51</sup> is evident at the macro-level of clinic organisation and in the moment-by-moment detail of clinical interaction, even down to the small gestures and nuance of talk. We have argued that electronic templates make a significant contribution to four interrelated phenomena: how disease is defined; how care is delivered; what it means to be a patient; what it means to be a clinician. In other words, the use of templates changes the very nature of what it means to 'care' in the contemporary chronic disease clinic. As we have seen above, 'care' is often reformulated as 'carrying out procedures' and stripped of the relational aspects of the word 'care'. The template can be seen to do *definitional* work.

The template is not just a simple faithful record of what went on. Nor is it just an aide-mémoire – though it may ensure, for example, that foot pulses are palpated and blood pressures taken (important aspects of diabetes care) and it is quite likely that these will be done in the order set out in the template. The template does not simply identify things which must be done but comes to define what chronic diseases *are*. On the one hand, the template is an impoverished 'squeezed in'<sup>52</sup> record of the encounter. It is where patients' stories morph into bytes of data; the particular becomes generalised; the complex is made discrete, simple and manageable, and uncertainty becomes categorised and contained. On the other hand, the template is *integral* to the consultation, and actively shapes what goes on, sustaining normative standards which are realised through consensus and performed daily through social practices. The work of transforming stories into data – and erasing ambiguity – is in itself complex interactional work for both clinician and patient. However this does not necessarily constitute the 'complex' response to a 'complex' problem as envisaged by Nolte et al, nor does it sit comfortably alongside the political rhetoric of 'nurse empowerment'.<sup>10 47</sup> This 'new' skilled human work does not appear in the completed template, and seems to go unrecognised – even by those who are engaged daily in doing it.

At no point in our field work did we encounter any suggestion from participants that the care of patients with chronic diseases might be done otherwise. Arguably templates are taken-for-

1  
2  
3 granted as part of 'good' chronic disease management. Nurses vary in their approaches, and  
4 individual nurses used different strategies within and across consultations according to  
5 emergent local contingencies. This is unsurprising. The constraints imposed by the template,  
6 and the inherent 'rationality-reality' gap<sup>29</sup> can be overcome (and our data suggest that they  
7 sometimes are) but this demands exceptional creativity. We have described one nurse's  
8 collaboration with a patient around the template and another who succeeded in  
9 simultaneously *internalising and excluding* the template. However these examples were  
10 unusual, and draw attention to what Blommaert calls "*creativity within constraints*" (page  
11 107),<sup>53</sup> a local form of creativity which is situated in what he calls "*the borderline zone of*  
12 *existing hegemonies...it becomes creative because it is measurable against normative*  
13 *hegemonic standards, because it creates understandable contrasts to such standards*"  
14 (page 106).  
15  
16  
17  
18  
19  
20  
21  
22

23 In the institutional account captured through the template, 'care' (specifically 'quality care' as  
24 currently incentivised in the Quality and Outcomes Framework) and patients with chronic  
25 diseases all start to look the same. Does this matter? One argument goes that as long as the  
26 interaction between clinician and patient facilitates the narrative, the particular, the complex  
27 and the ambiguous and this occurs within a therapeutic relationship which supports  
28 relational continuity, then it may not matter much. But close observation of actual practice  
29 suggests that, more often than not, nurses are constrained by the linear, instrumental logic  
30 of the template with its tendency to privilege biomedical, measurable concerns. The  
31 consultation can become a relatively bureaucratic transaction in which patients are shaped  
32 into an institutional framework<sup>52</sup> and meaningful involvement is difficult to sustain.<sup>23</sup> Both  
33 nurse and patient experience institutional constraints on what may be talked about and what  
34 the chronic disease review can 'be'. Practices become 'regimented'.<sup>54;55</sup>  
35  
36  
37  
38  
39  
40  
41  
42

### 43 **Strengths and limitations of this study**

44  
45 A particular strength of this study rests with the sophisticated combination of qualitative  
46 ethnographic observation alongside video and screen capture, allowing us to open up the  
47 'black box' of the electronic patient record to detailed scrutiny.<sup>31</sup> What emerges is a  
48 conceptualisation of the electronic record as *integral to* the social processes of consultation,  
49 not simply a peripheral 'add-on' to the consultation. Our approach has enabled us to study  
50 the subtle complexities of interaction between humans and technologies, whilst retaining a  
51 broad appreciation of the institutions within which these interactions take place.<sup>56</sup> We have  
52 been able to build what anthropologists call a "thick description"<sup>57</sup> of the electronic patient  
53 record in its social context – combining detailed observational description with analysis and  
54  
55  
56  
57  
58  
59  
60

1  
2  
3 reflective interpretation. It has enabled us to explore working practices at a level of detail that  
4 more conventional qualitative methods (such as interviews or semi-structured  
5 questionnaires) cannot reach. For example, our focus has been on *actual* social practice  
6 rather than on participants' reports alone, and our enquiry has extended into the 'backstage'  
7 regions<sup>36</sup> of general practice as well as the consulting room. We have been able to highlight  
8 the profound influence of the template by drawing eclectically on a broad range of data  
9 sources, shifting constantly between 'zooming in' on the moment-by-moment detail of the  
10 consultation, and 'zooming out' to consider organisational practices (what Erickson has  
11 called the 'social microscope' and the 'social telescope').<sup>58</sup> This linguistic ethnographic  
12 approach offers great potential for the study of complex social practices in contemporary  
13 healthcare, including those which incorporate information technologies.  
14  
15  
16  
17  
18  
19

20  
21 Our approach is time consuming and resource intensive, and our prioritisation of *depth* of  
22 analysis over breadth has meant that we have included only two general practices in this  
23 study and these may not be typical of all practices in how they approach either chronic  
24 disease management or the use of technologies. Furthermore, both practices used the same  
25 clinical system (EMIS-LV) and there may be important technical differences between  
26 systems. However as a principle we favoured what Stake has called 'opportunity to learn'  
27 over concerns about 'typicality'<sup>59</sup> and we hope that our work prompts new ways of thinking  
28 about the use of templates in chronic disease management. Templates are not unique to the  
29 EMIS-LV system, and we suspect that our findings may resonate with the experience of  
30 many clinicians who are using electronic checklists in the clinic. Although our methodological  
31 approach does not allow us to quantify the extent to which clinicians are able to combine a  
32 patient-centred approach whilst meeting the needs of the institution, we have been able to  
33 observe a range of practices which highlight the need to think more critically about what is  
34 being accomplished through the implementation and use of electronic templates in this  
35 context.  
36  
37  
38  
39  
40  
41  
42  
43  
44

### 45 **Recommendations for policy and practice**

46  
47 Although considerable care is invested in ensuring the diligent use of electronic templates in  
48 general practice, much less attention is paid to how these are actually used by clinicians, or  
49 to the possibility that incorporating a template might profoundly change the way in which  
50 care is 'enacted' by professionals, and experienced by patients.  
51  
52  
53  
54

55  
56 Ostensibly the data recording necessary for institutional processes such as the Quality and  
57 Outcomes Framework emerges effortlessly from regular clinical care, and serves to improve  
58  
59  
60

1  
2  
3 the quality of care. Our data show that paradoxically, the focus on what is measurable and  
4 recordable in templates, and designed to assure certain standards of 'quality' care (such as  
5 those identified in the QOF) can lead to a bureaucratisation of care and may serve to  
6 marginalise those aspects of 'quality' practice which lie beyond their focus, and which do not  
7 lend themselves to 'data capture'. These include – but are not limited to – the extent of the  
8 patient's opportunity to construct their narrative and the extent to which the clinician and  
9 patient are fully 'involved' in the interaction. Arguably these may well be aspects of care  
10 which mark out 'quality' care from 'minimum to be expected' care. Whilst incentivising  
11 clinicians may well result in better data quality it should not be assumed that the quality of  
12 care (in its most holistic sense) improves, although the care of the patient may be profoundly  
13 changed.  
14  
15  
16  
17  
18  
19

20  
21 We suggest that in educating for chronic disease management, it is essential to incorporate  
22 greater recognition of the way in which clinicians integrate the electronic patient record and  
23 to regard this as an integral aspect of the consultation. In particular, that special effort is  
24 made to ensure that the patient's unique experience is not overshadowed by institutional  
25 imperatives. We would also urge a shift towards models of care delivery which embrace  
26 multimorbidity as the norm and which seek to embrace the complexity of this reality in  
27 primary care, while still allowing appropriate data capture to inform the evidence-based  
28 management of specific diseases.  
29  
30  
31  
32  
33

### 34 35 36 ***Research ethics approval***

37  
38 Research ethics approval was granted by Thames Valley Multi-centre Research Ethics  
39 Committee (06/MRE12/81) in January 2007 and subsequent amendments.  
40  
41

### 42 ***Funding***

43  
44 This work was funded by a research grant from the UK Medical Research Council  
45 (Healthcare Electronic Records in Organisations, 07/133) and a National Institute for Health  
46 Research Doctoral Fellowship Award (RDA/03/07/076) for DS. Our funders were not  
47 involved in the selection or analysis of data, or in contributing to the content of the final  
48 manuscript.  
49  
50  
51

### 52 53 ***Data Sharing***

54  
55 No additional data available.  
56  
57  
58  
59  
60

### ***Acknowledgement***

We thank staff and patients in two UK general practices for their participation in this work.

### ***Contributorship***

The paper is based on a PhD thesis written by DS and supervised by TG and CR. DS and TG conceptualised the HERO study. DS completed all data collection. All authors contributed to interpretation of the data. The paper was drafted by DS and revised with input from TG and CR. All authors approve the final version. DS is the guarantor for the paper.

For peer review only

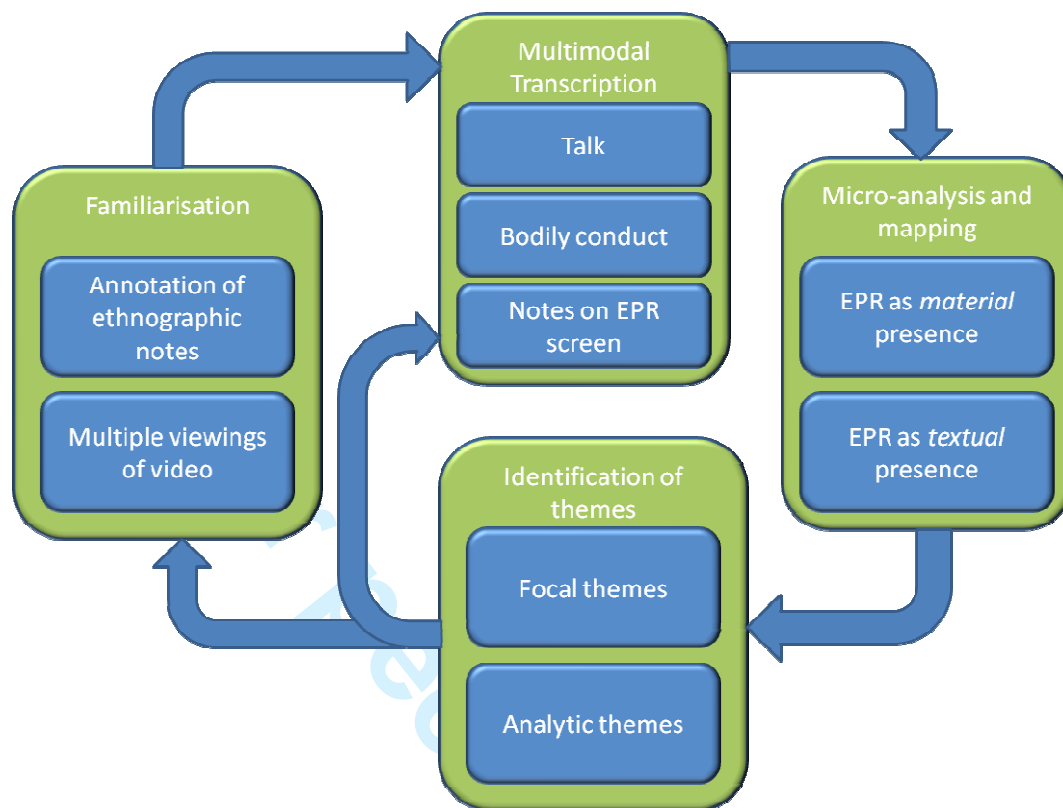

Figure 1. Approach to transcription and analysis

**Box 1. Framing the purpose of the chronic disease management clinic (ethnographic fieldnotes)**

A frail-looking 86 year old man struggled in to the clinic, barely able to walk. He was very deaf. He hung his walking stick over his chair and grimaced as he sat down, looking as if he was in pain. The nurse said loudly "We've called you in to look at you from the heart point of view. I know you have a lot of other things going on but we've called you in to look at your heart." She then asked "How often do you use the angina tablet under your tongue?" The patient replied in a way which made his most pressing concern clear: "Not much...for the simple reason that I can only crawl like a tortoise" Nurse: "and the simvastatin?" Patient: "no...I stopped that. I think it's giving me diarrhoea. These hearing aids are not very good you know. I've had it adjusted several times but I'm really disappointed. I had hoped for better than this"



**Box 2. Constructing patienthood in the asthma clinic (ethnographic fieldnotes)**

Sam, a lively 2-year-old came with his mum. He ran excitedly around the clinic room investigating every corner. His mum seemed exasperated and said she was not getting far with his treatment, a plastic “spacer” device to which the “pumps” were attached. The boy’s dad and grandparents were asthmatic, but Sam only saw his dad occasionally at weekends these days.

The nurse explained that the diagnosis of asthma cannot be certain in a 2-year-old. Things might be clearer by the time he was about 4. His mum was obviously relieved to know that it was not a definite thing. She was very anxious that her ex-partner wouldn’t know how to look after her son when he goes to visit. She asked “*There’s nothing I could have done to stop him getting it, is there?*” The nurse explained it was not her fault and did what she could to be reassuring. She explained what the different inhalers do...

The nurse pointed towards the computer, saying that she was going to make some notes. She completed the template line by line and there was no talking for several minutes. Sam ran towards the door and started rattling the door handle, but his mum said firmly “*NO...you’ve got to wait for the lady to finish her typing*”.

The nurse handed over a prescription and they left.

The EPR consisted of a collection of Read coded entries with some limited free text alongside:

*Never smoked tobacco*

*Inhaler technique moderate*

*Inhaler technique shown (needs to commence low dose ICS. I will monitor)*

*Symptoms occur at night (7/7)*

*Asthma limiting activities*

*Asthma management plan*

*Asthma compliance satisfactory (needs ICS)*

*Asthma daytime symptoms (consistent cough)*

*Asthma medication review*

*Asthma monitoring check done*

*Follow up asthma assessment (date)*

Table 1. Extract from consultation in diabetic clinic

| Time  | N/P | Words spoken /sounds                                                                                                    | Bodily conduct                                                               | Screen                                                                                                               |
|-------|-----|-------------------------------------------------------------------------------------------------------------------------|------------------------------------------------------------------------------|----------------------------------------------------------------------------------------------------------------------|
| 18.54 | N   | Does the diabetes get you<br>↑ <u>down</u> Mr C?                                                                        | N - > EPR; P looking down doing shoelaces<br>N < - > P                       | Diabetes template, with fields completed relating to foot examination. Cursor highlights field "Eye Clinic" (Y or N) |
|       |     | (1.0)                                                                                                                   | N < - > P. P puts hands on both knees.                                       |                                                                                                                      |
| 18.57 | P   | I get bored with life.                                                                                                  | P frowns                                                                     |                                                                                                                      |
| 18.58 | N   | Bo::red?<br>What bored with the f:ood o:r                                                                               | P turns head to gaze at adjacent chair. N - > P<br>P < - > N                 |                                                                                                                      |
|       |     | (1.2)                                                                                                                   |                                                                              |                                                                                                                      |
| 19.00 | P   | HA<br>HA HA                                                                                                             | P turns to adjacent chair and lifts jumper                                   |                                                                                                                      |
| 19.02 | P   | .hhh ah well °never mind°                                                                                               | P lifts jumper as turns toward N again                                       |                                                                                                                      |
|       |     | (0.2)                                                                                                                   |                                                                              |                                                                                                                      |
| 19.04 | P   | I<br>u::- used to be a <u>drinking</u> man                                                                              | P <-> N<br>P looks straight ahead. N remain looking at P                     |                                                                                                                      |
|       |     | (0.8)                                                                                                                   |                                                                              |                                                                                                                      |
| 19.06 | N   | [right                                                                                                                  |                                                                              |                                                                                                                      |
| 19.07 | P   | [And when I had to give up the beer I had to give up an <u>awful</u> lot of other things: (.) <u>surprising</u> really. | P holds jumper up in front of him and arranges it, looking at it as he talks |                                                                                                                      |
| 19.11 | N   | °<Yeah (.) yeah>°                                                                                                       | N - > P                                                                      |                                                                                                                      |
|       | P   | mm                                                                                                                      | P looks ahead, purses lips                                                   |                                                                                                                      |
| 19.13 | N   | So you have a <u>whiskey</u>                                                                                            | P turns to N                                                                 |                                                                                                                      |
|       |     | (0.8)                                                                                                                   |                                                                              |                                                                                                                      |
| 19.15 | P   | Yeah I have a whiskey at night                                                                                          | P < - > N                                                                    |                                                                                                                      |
| 19.16 | N   | °yeh°                                                                                                                   | N nods                                                                       |                                                                                                                      |
|       |     | (0.2)                                                                                                                   |                                                                              |                                                                                                                      |
| 19.17 | P   | Cos ↑ <u>whiskey</u> hasn't got much <u>sugar</u> in [surprising                                                        | P returns to rearranging jumper holding it up in front                       |                                                                                                                      |
|       | N   | [no:                                                                                                                    |                                                                              |                                                                                                                      |
|       | P   | its all been turned into alcohol a <u>good</u> whiskey maker so                                                         |                                                                              |                                                                                                                      |
|       |     | (0.8)                                                                                                                   | P still holding jumper in front turns to N                                   |                                                                                                                      |
| 19.23 | N   | And <u>beer</u> has quite a lot of carbohydrate doesn't it                                                              | N - > P , N nodding slightly                                                 |                                                                                                                      |
|       | P   | [yeah                                                                                                                   | P returns gaze to jumper, nodding                                            |                                                                                                                      |
|       |     | [when you think of the volume                                                                                           |                                                                              |                                                                                                                      |
|       |     | (0.6)                                                                                                                   | N turns gaze to her desk                                                     |                                                                                                                      |
| 19.27 | N   | °okay°                                                                                                                  | N gazing at desk, P arranging jumper                                         |                                                                                                                      |
|       |     | (1.6)                                                                                                                   |                                                                              |                                                                                                                      |
| 19.29 | N   | °All right then°                                                                                                        |                                                                              |                                                                                                                      |
|       |     | ((N typing for 12 seconds))                                                                                             | P looking ahead putting jumper over head. N rotates to face EPR              | Bypasses field "diet" Bypasses field "impotence" Next field is "depression screen" –enters 'Y'.                      |

Table 2. Setting up the frame for the asthma consultation

| Time  | N/P | Spoken word                                                                                                                                                           | Bodily conduct / notes on EPR                                                                      |
|-------|-----|-----------------------------------------------------------------------------------------------------------------------------------------------------------------------|----------------------------------------------------------------------------------------------------|
| 01:08 | N   | So really straightforward.<br>(0.4)                                                                                                                                   | N puts paper on desk<br>N rotates body and gaze to face P, her hands on her lap.<br>P looking at N |
| 01:09 | N   | Asthma assessment<br>(0.4)                                                                                                                                            |                                                                                                    |
|       | P   | Okay                                                                                                                                                                  | P nods                                                                                             |
| 01:11 | N   | to see how your asthma's doing:                                                                                                                                       | N raises both hands in front                                                                       |
| 01:13 | N   | what you're doing w- with it when<br>it's good, what you do with it<br>when it's bad,<br>(0.2)<br>have you any problems with your<br>↑inhalers<br>(0.4) .hhh<br>(0.5) | N uses fingers to count (on "good", "bad", "problems")<br><br>N hands open out in front of her     |
| 01:19 | N   | Very straightforward stuff                                                                                                                                            | N hands to lap                                                                                     |
|       | P   | Okay                                                                                                                                                                  | P nods                                                                                             |
|       | N   | [all right?<br>.hhh                                                                                                                                                   |                                                                                                    |
| 01:21 | N   | U:::hm                                                                                                                                                                | N rotates body and gaze to EPR screen, hands on lap                                                |
| 01:23 | N   | What I've got <u>here</u>                                                                                                                                             | N gestures her open hands towards the EPR screen (displaying<br>the patients "summary" screen)     |
| 01:24 | N   | Is that you're on:: (0.4) a purple<br>inhaler?                                                                                                                        | N rotates back towards P, bringing hands together                                                  |
| 01:26 | P   | (0.2)<br>Yeh (.)<br>uhm (0.2)<br>seretide.                                                                                                                            | P glances briefly towards the EPR screen                                                           |

Table 3. Opening of asthma consultation

| Time  |   | Words spoken                                                                                                    | Bodily conduct / EPR screen                                                                                                                                                                                                                                                                 |
|-------|---|-----------------------------------------------------------------------------------------------------------------|---------------------------------------------------------------------------------------------------------------------------------------------------------------------------------------------------------------------------------------------------------------------------------------------|
| 00:57 | N | ..uh SO:<br>(0.6)<br>[ tell me<br>[C<br><br>(0.3)<br>what inhalers do you use (.)<br>an:d when do you use them. | N writing<br><br>Remains oriented to P as makes one keystroke to display prescriptions<br><br>N rotates her chair, pulling it back away from desk & re-orientating so that posture and gaze are towards P. She gestures towards his inhalers on the desk with her L hand on "what inhalers" |
|       |   | (0.4)                                                                                                           | N draws chair closer to P, still oriented towards him                                                                                                                                                                                                                                       |
| 1:02  | P | U::hm<br>(1.8)<br>Well say like if I get >sort<br>of< out of breath                                             | P rubs his nose<br>P puts his hand on inhaler, looking at N                                                                                                                                                                                                                                 |
|       |   | (0.4)                                                                                                           |                                                                                                                                                                                                                                                                                             |
| 1:07  | N | Uh uh                                                                                                           | N nods                                                                                                                                                                                                                                                                                      |
|       | P | then I'll take the brown one.                                                                                   | P points to brown inhaler on desk and looks at it                                                                                                                                                                                                                                           |
| 1:09  | N | Uh uh                                                                                                           | N nods, looking at P                                                                                                                                                                                                                                                                        |
|       |   | (1.2)                                                                                                           | Mutual gaze                                                                                                                                                                                                                                                                                 |
| 1:10  | P | but uhm                                                                                                         | P looks down at inhalers                                                                                                                                                                                                                                                                    |
|       |   | (2.7)                                                                                                           | P <-> N. P shrugs his shoulders                                                                                                                                                                                                                                                             |
| 1:14  | P | He [he                                                                                                          | P smiles, and slight laugh as looks at N                                                                                                                                                                                                                                                    |
|       | N | [he he he                                                                                                       | N joins P in smiling and a slight laugh. N shrugs her shoulders                                                                                                                                                                                                                             |
| 1:15  | P | I mean sometimes I'll use<br>the blue one.                                                                      | P lifts blue inhaler just off desk, looking at N                                                                                                                                                                                                                                            |
|       |   | (0.4)                                                                                                           |                                                                                                                                                                                                                                                                                             |
| 1:17  | N | Right                                                                                                           | N nods                                                                                                                                                                                                                                                                                      |

Table 4. Creative use of template

| Time                      | N/P | Words                                                                                                                                                                      | Bodily conduct                                                                                                                                                                                                  | Screen                                                                                                                                                                                                                                                               |
|---------------------------|-----|----------------------------------------------------------------------------------------------------------------------------------------------------------------------------|-----------------------------------------------------------------------------------------------------------------------------------------------------------------------------------------------------------------|----------------------------------------------------------------------------------------------------------------------------------------------------------------------------------------------------------------------------------------------------------------------|
| 10.37                     | N   | Let's pop it in the screen and see what we've got.                                                                                                                         | N pulls her chair in to the desk, gazing at screen. P ->EPR                                                                                                                                                     | Consultation screen                                                                                                                                                                                                                                                  |
| 10.39                     | N   | [A::dd<br>[C<br>(C)<br>[Templates<br>[C<br>(C)<br>[Respiratory<br>[C<br>(C)<br>[Asthma<br>[C<br>(C)                                                                        | N types keystrokes with her R hand holding PEFR meter in her L hand.<br>P looks at screen throughout                                                                                                            | Consultation screen. Entry 2 months earlier by receptionist – <i>Asthma check due</i> .<br>Navigates to “templates”<br>List of templates presented<br><br>Selects R – respiratory templates<br><br>There are 4 respiratory templates from which she selects A asthma |
| 10.43                     | N   | <u>So</u><br>Monitoring check [DONE<br>[C<br><br>[Now<br>[C<br>your height was a hundred and seventy one point fi:::::ve<br><br>.hhh look you've <u>grown</u> a centimetre | N looks down at piece of paper to L of her desk then types in his height into template<br><br>N gazes at screen and points to the screen sweeping finger across to show him the previous height on the template | First line in template “monitoring done” – she adds Y (yes). Hits return so today's date is entered. Then skips a line called “except report”<br>Field: O/E height,                                                                                                  |
| 10.49                     | P   | Have I<br>HE HE (laughs)<br>[C C]<br>(0.8)<br><br>[Doesn't show it<br>[C                                                                                                   | [return]                                                                                                                                                                                                        | Field: O/E weight, last recorded entry 16m ago                                                                                                                                                                                                                       |
|                           | N   | he he<br>(0.2)                                                                                                                                                             |                                                                                                                                                                                                                 | Field: smoking status (7 options). Last recorded entry “Never” 30m ago                                                                                                                                                                                               |
| (Transcript not shown)... |     |                                                                                                                                                                            |                                                                                                                                                                                                                 |                                                                                                                                                                                                                                                                      |
| 11.11                     | N   | O:kay<br>↑SO::<br>(1.0)                                                                                                                                                    | N looks down at paper on her desk, pointing at it with R hand                                                                                                                                                   | Field: Peak Flow Rate                                                                                                                                                                                                                                                |
| 11.14                     | N   | Five <u>thirty</u> was your best wasn't it<br><br>(( C C C C )) (3.7)                                                                                                      | N->EPR; P->EPR<br><br>N-> keyboard as types.<br>P->EPR                                                                                                                                                          | Enters 530, return displays today's date.<br>EPR calculates predicted PEFR as 600                                                                                                                                                                                    |
| 11.19                     | N   | So: your predicted is 600 >so it's a little bit< under but that's not <u>too</u> bad                                                                                       | N and P looking at screen                                                                                                                                                                                       |                                                                                                                                                                                                                                                                      |
| 11.24                     | N   | ↑was five thirty your best?<br>(1.8)                                                                                                                                       | N-> EPR; P-> EPR<br><br>N reaches for PEFR meter and looks at gauge. P-> N                                                                                                                                      |                                                                                                                                                                                                                                                                      |
| 11.27                     | P   | [°was it five eighty?°]                                                                                                                                                    | N tightens cap on PEFR, P looking at N                                                                                                                                                                          |                                                                                                                                                                                                                                                                      |
|                           | N   | [Just do it once more for me                                                                                                                                               |                                                                                                                                                                                                                 |                                                                                                                                                                                                                                                                      |
| 11.29                     | N   | DID YOU::?                                                                                                                                                                 | N passes PEFR to P who stands up as receives it                                                                                                                                                                 |                                                                                                                                                                                                                                                                      |

## Appendix

### Transcribing conventions, adapted from Atkinson and Heritage (1984)

|                                                                                     |                                                               |
|-------------------------------------------------------------------------------------|---------------------------------------------------------------|
| [ onset of overlapping speech                                                       | .hhh inbreath                                                 |
| ] end of spate of overlapping talk                                                  | Hhh outbreath                                                 |
| [[ speakers start a turn simultaneously                                             | = no pause between speakers; contiguous utterances            |
| : preceding sound is lengthened or drawn out<br>(more : means greater prolongation) | (( )) a non verbal activity (e.g. C = keystroke in this work) |
| <u>Underlining</u> emphasis                                                         | ( text ) unclear fragment of text                             |
| (.) pause of less than 0.2 seconds                                                  | . falling tone (not necessarily end of sentence)              |
| (0.4) pause, in tenths of a second                                                  | ? rising inflection (not necessarily a question)              |
| ↑↓ marked rising / falling intonation                                               | <b>CAPITALS</b> louder than surrounding talk                  |
| >text< the talk they surround is quicker than surrounding talk                      | <text> the talk they surround is slower than surrounding talk |
| °° the talk they surround is quieter than surrounding talk                          |                                                               |

## Reference List

- 1  
2  
3  
4  
5 (1) Wagner E, Austin B, Von Korff M. Organising care for patients with chronic illness. *Milbank Quarterly* 1996; 74(4):511-544.
- 6  
7  
8 (2) Ham C. The ten characteristics of the high-performing chronic care system. *Health*  
9  
10 *Economics, Policy and Law* 2010; 5:71-90.
- 11 (3) Greenhalgh T, Potts HWW, Wong G, Bark P, Swinglehurst D. Tensions and  
12 Paradoxes in Electronic Patient Record Research: A Systematic Literature Review  
13 Using the Meta-narrative Method. *The Milbank Quarterly* 2009; 87(4):729-788.
- 14 (4) Black AD, Car J, Pagliari C, Anandan C, Cresswell K, Bokun T et al. The Impact of  
15 eHealth on the Quality & Safety of Health Care: A Systematic Overview. *PLoS Med*  
16 2011; 8(1):e1000387.
- 17 (5) Monteiro E, Hepsø. Purity and Danger of an Information Infrastructure. *Systemic*  
18 *Practice and Action Research* 2002; 15(2):145-167.
- 19 (6) Department of Health. Improving chronic disease management. Downloadable from  
20 [http://www.dh.gov.uk/prod\\_consum\\_dh/groups/dh\\_digitalassets/@dh/@en/document](http://www.dh.gov.uk/prod_consum_dh/groups/dh_digitalassets/@dh/@en/document/s/digitalasset/dh_4075213.pdf)  
21 [s/digitalasset/dh\\_4075213.pdf](http://www.dh.gov.uk/prod_consum_dh/groups/dh_digitalassets/@dh/@en/document/s/digitalasset/dh_4075213.pdf). 2004.
- 22 (7) Singh D, Ham C. Improving care for people with long term conditions A review of  
23 UK and international management frameworks. Birmingham: NHS Institute for  
24 Innovation and Improvement; University of Birmingham; 2006.
- 25 (8) Berg M. Implementing information systems in health care organizations: myths and  
26 challenges. *International Journal of Medical Informatics* 2001; 64:143-156.
- 27 (9) General Practitioners Committee. Quality and Outcomes Framework. Guidance -  
28 Updated August 2004. Downloadable from  
29 [http://www.dh.gov.uk/prod\\_consum\\_dh/groups/dh\\_digitalassets/@dh/@en/document](http://www.dh.gov.uk/prod_consum_dh/groups/dh_digitalassets/@dh/@en/document/s/digitalasset/dh_4088693.pdf)  
30 [s/digitalasset/dh\\_4088693.pdf](http://www.dh.gov.uk/prod_consum_dh/groups/dh_digitalassets/@dh/@en/document/s/digitalasset/dh_4088693.pdf). 2009.
- 31 (10) Nolte E, Knai C, McKee M. Managing chronic conditions: An introduction to the  
32 experience in eight countries. In: Nolte E, Knai C, McKee M, editors. Managing  
33 chronic conditions. European Observatory on Health Systems and Policies; 2008. 1-  
34 14.
- 35 (11) Guthrie B, Saultz JW, Freeman GK, Haggerty L. Continuity of care matters. *BMJ*  
36 2008; 337:a867.
- 37 (12) Roland M, Campbell S, Bailey N, Whalley D, Sibbald B. Financial incentives to  
38 improve the quality of primary care in the UK: predicting the consequences of  
39 change. *Primary Health Care Research and Development* 2006; 7:18-26.
- 40 (13) Watt G. Blue sky research for primary care: A discussion paper. Downloadable from  
41 <http://www.sapc.ac.uk/images/documents/blue.pdf>. Society for Academic Primary  
42 Care; 2011.
- 43  
44  
45  
46  
47  
48  
49  
50  
51  
52  
53  
54  
55  
56  
57  
58  
59  
60

- 1  
2  
3 (14) Fortin M, Soubhi H, Hudon C, Bayliss E, van den Akker M. Multimorbidity's many  
4 challenges. *BMJ* 2007; 334.  
5  
6 (15) The NIHR School for Primary Care Research. See:  
7 [http://www.nihr.ac.uk/research/Pages/programmes\\_primary\\_care\\_research.aspx](http://www.nihr.ac.uk/research/Pages/programmes_primary_care_research.aspx).  
8 2012.  
9  
10 (16) Rhodes P, Langdon M, Rowley E, Wright J, Small N. What Does the Use of a  
11 Computerized Checklist Mean for Patient-Centred Care? The Example of a Routine  
12 Diabetes Review. *Qualitative Health Research* 2006; 16(3):353-376.  
13  
14 (17) McDonald R, Harrison S, Checkland K, Campbell S, Roland M. Impact of financial  
15 incentives on clinical autonomy and internal motivation in primary care: ethnographic  
16 study. *BMJ* 2007; 39239.890810.BE.  
17  
18 (18) Checkland K, McDonald R, Harrison S. Ticking Boxes and Changing the Social  
19 World: Data Collection and the New UK General Practice Contract. *Social Policy &*  
20 *Administration* 2007; 41(7):693-710.  
21  
22 (19) Edgar A. The expert patient: Illness as practice. *Medicine, Health Care and*  
23 *Philosophy* 2005; 8:165-171.  
24  
25 (20) Frank A. *The Wounded Storyteller: Body, Illness, and Ethics*. Chicago: University of  
26 Chicago Press; 1995.  
27  
28 (21) Kleinmann A. *The illness narratives: suffering, healing and the human condition*. New  
29 York: Basic Books; 1988.  
30  
31 (22) Strauss AL. *Chronic illness and the quality of life*. St. Louis: Mosby; 1975.  
32  
33 (23) Goffman E. *Involvement. Behavior in Public Places*. New York: The Free Press;  
34 1966. 33-42.  
35  
36 (24) Berger J, Mohr J. *A Fortunate Man; the Story of a Country Doctor*. The Penguin  
37 Press; 1967.  
38  
39 (25) Heath I. *The Mystery of General Practice*. Nuffield Provincial Hospitals Trust,  
40 London; 1995.  
41  
42 (26) Charon R. Narrative Medicine: Form, Function, and Ethics. *Annals of Internal*  
43 *Medicine* 2001; 134(1):83-87.  
44  
45 (27) Greenhalgh T, Hurwitz B. Why study narrative? *BMJ* 1999; 318:48-50.  
46  
47 (28) Balint M. *The Doctor, His Patient and the Illness*. 2nd ed. Edinburgh: Churchill  
48 Livingstone; 1964.  
49  
50 (29) Heeks R, Mundy D, Salazar A. *Why Health Care Information Systems Succeed or*  
51 *Fail*. University of Manchester: Institute for Development Policy and Management;  
52 1999.  
53  
54  
55  
56  
57  
58  
59  
60



- 1  
2  
3 (30) Berg M. Health care work and patient care information systems. *Health Information*  
4 *Management - integrating information technology in health care work*. 2004. 45-64.  
5  
6 (31) Swinglehurst D, Roberts C, Greenhalgh T. Opening up the "black box" of the  
7 electronic patient record: A linguistic ethnographic study in general practice.  
8 *Communication and Medicine* 2011; 8(1):3-15.  
9  
10 (32) Berg M. Of Forms, Containers, and the Electronic Medical Record: Some Tools for a  
11 *Sociology of the Formal*. *Science, Technology & Human Values* 1997; 22(4):403-433.  
12  
13 (33) Berg M. Practices of reading and writing: the constitutive role of the patient record in  
14 medical work. *Sociology of Health and Illness* 1996; 18(4):499-524.  
15  
16 (34) Timmermans S, Berg M. The gold standard: The challenge of evidence-based  
17 medicine and standardization in health care. Philadelphia: Temple University Press;  
18 2003.  
19  
20 (35) Swinglehurst D, Greenhalgh T, Myall M, Russell J. Ethnographic study of ICT-  
21 supported collaborative work routines in general practice. *BMC Health Serv Res*  
22 2010; 10:348.  
23  
24 (36) Goffman E. *Regions and Region Behaviour. The Presentation of Self in Everyday*  
25 *Life*. London: Penguin Books; 1959. 109-140.  
26  
27 (37) Green J, Thorogood N. *Qualitative Methods for Health Research*. London, California,  
28 New Delhi: SAGE Publications Ltd; 2004.  
29  
30 (38) Rampton B, Tusting K, Maybin J, Barwell R, Creese A, Lytra V. UK Linguistic  
31 Ethnography: A discussion paper. Downloadable from [http://www.ling-](http://www.ling-ethnog.org.uk/documents/papers/ramptonetal2004.pdf)  
32 [ethnog.org.uk/documents/papers/ramptonetal2004.pdf](http://www.ling-ethnog.org.uk/documents/papers/ramptonetal2004.pdf). 2004.  
33  
34 (39) Roberts C, Sarangi S. Theme-oriented discourse analysis of medical encounters.  
35 *Medical Education* 2005; 39:632-640.  
36  
37 (40) Atkinson JM, Heritage J. Transcript notation. In: Atkinson JM, Heritage J, editors.  
38 *Structures of Social Action: Studies in Conversation Analysis*. Cambridge: Cambridge  
39 University Press; 1984. ix-xvi.  
40  
41 (41) Jewitt C. Towards a multimodal analysis. *Technology, literacy and learning: a*  
42 *multimodal approach*. Abingdon: Routledge; 2006. 32-52.  
43  
44 (42) Goodwin C. Professional Vision. *American Anthropologist* 1994; 96(3):606-633.  
45  
46 (43) Blommaert J. Sociolinguistic scales. *Working Papers in Urban Language &*  
47 *Literacies*, Paper 37. Institute of Education; 2006.  
48  
49 (44) Sarangi S, Slembrouck S. The pragmatics of information exchange in bureaucratic  
50 discourse. In: Sarangi S, Slembrouck S, editors. *Language, Bureaucracy & Social*  
51 *Control*. Harlow: Addison Wesley Longman Limited; 1996. 17-35.  
52  
53  
54  
55  
56  
57  
58  
59  
60

- 1  
2  
3 (45) Roberts C, Esmail A, Sarangi S, Southgate L, Wakeford R, Wass V et al. Oral  
4 examinations - equal opportunities, ethnicity, and fairness in the MRCGP. *BMJ* 2000;  
5 320:370.  
6  
7 (46) May C, Rapley T, Moreira T, Finch T, Heaven B. Technogovernance: Evidence,  
8 subjectivity, and the clinical encounter in primary care medicine. *Social Science &*  
9 *Medicine* 2006; 62:1022-1030.  
10  
11 (47) Department of Health. Liberating the Talents: Helping primary care trusts and nurses  
12 to deliver the NHS Plan. Downloadable from  
13 [http://www.dh.gov.uk/en/Publicationsandstatistics/Publications/PublicationsPolicyAndGuidance/DH\\_4007473](http://www.dh.gov.uk/en/Publicationsandstatistics/Publications/PublicationsPolicyAndGuidance/DH_4007473). 2002.  
14  
15 (48) Charles-Jones H, Latimer J, May C. Transforming general practice: the redistribution  
16 of medical work in primary care. *Sociology of Health and Illness* 2003; 25(1):71-92.  
17  
18 (49) Bourdieu P. Outline of a Theory of Practice. Cambridge: Polity; 1977.  
19  
20 (50) Bourdieu P. The Logic of Practice. Cambridge: Polity; 1990.  
21  
22 (51) Roberts C, Campbell S. Fitting stories into boxes: rhetorical and textual constraints on  
23 candidates' performances in British job interviews. *Journal of Applied Linguistics*  
24 2005; 2(1):45-73.  
25  
26 (52) Douglas M. Institutions Do the Classifying. How Institutions Think. New York:  
27 Syracuse University Press; 1986. 91-109.  
28  
29 (53) Blommaert J. Choice and Determination. Discourse: Key topics in sociolinguistics.  
30 Cambridge: Cambridge University Press; 2005. 98-124.  
31  
32 (54) Blommaert J. Discourse. Cambridge: Cambridge University Press; 2005.  
33  
34 (55) Blommaert J, Collins J, Slembrouck S. Polycentricity and interactional regimes in  
35 "global neighbourhoods". *Ethnography* 2005; 6(2):205-235.  
36  
37 (56) Greenhalgh T, Swinglehurst D. Studying technology use as social practice: the  
38 untapped potential of ethnography. *BMC Medicine* 2011; 9:45.  
39  
40 (57) Geertz C. Thick Description: Toward an Interpretive Theory of Culture. The  
41 Interpretation of Cultures. New York: Basic Books; 1973. 3-30.  
42  
43 (58) Erickson F. Talk and Social Theory. Cambridge: Polity; 2004.  
44  
45 (59) Stake RE. Qualitative Case Studies. In: Denzin NK, Lincoln YS, editors. The Sage  
46 Handbook of Qualitative Research. 3rd ed. Sage Publications, Inc; 2005. 443-466.  
47  
48  
49  
50  
51  
52  
53  
54  
55  
56  
57  
58  
59  
60



**Computer templates in chronic disease management:  
ethnographic case study in general practice**

|                                 |                                                                                                                                                                                                                                                                                                |
|---------------------------------|------------------------------------------------------------------------------------------------------------------------------------------------------------------------------------------------------------------------------------------------------------------------------------------------|
| Journal:                        | <i>BMJ Open</i>                                                                                                                                                                                                                                                                                |
| Manuscript ID:                  | bmjopen-2012-001754.R1                                                                                                                                                                                                                                                                         |
| Article Type:                   | Research                                                                                                                                                                                                                                                                                       |
| Date Submitted by the Author:   | 03-Oct-2012                                                                                                                                                                                                                                                                                    |
| Complete List of Authors:       | Swinglehurst, Deborah; Queen Mary University of London, Centre for Primary Care and Public Health<br>Greenhalgh, Trisha; Queen Mary University of London, Centre for Primary Care and Public Health<br>Roberts, Celia; King's College London, Department of Education and Professional Studies |
| <b>Primary Subject Heading</b>: | General practice / Family practice                                                                                                                                                                                                                                                             |
| Secondary Subject Heading:      | Qualitative research                                                                                                                                                                                                                                                                           |
| Keywords:                       | Information management < BIOTECHNOLOGY & BIOINFORMATICS, Quality in health care < HEALTH SERVICES ADMINISTRATION & MANAGEMENT, PRIMARY CARE, QUALITATIVE RESEARCH, Organisation of health services < HEALTH SERVICES ADMINISTRATION & MANAGEMENT                                               |
|                                 |                                                                                                                                                                                                                                                                                                |

SCHOLARONE™  
Manuscripts

Original paper submitted to BMJ Open June 2012

## Computer templates in chronic disease management: ethnographic case study in general practice

Deborah Swinglehurst\* (corresponding author)  
NIHR Academic Clinical Lecturer

Trisha Greenhalgh\*  
Professor of Primary Health Care

Celia Roberts\*\*  
Professor of Applied Linguistics

\*Centre for Primary Care and Public Health, Queen Mary, University of London, 58 Turner Street, London E1 2AB

\*\* Department of Education and Professional Studies, King's College London, Franklin Wilkins Annexe, Waterloo Road, London SE1 9NN

Corresponding author: Deborah Swinglehurst  
Correspondence address:

p: as above

t: +44 20 7882 7204

f: +44 20 7882 2552

e: [d.swinglehurst@qmul.ac.uk](mailto:d.swinglehurst@qmul.ac.uk)

All authors have completed the Unified Competing Interest form at [http://www.icmje.org/coi\\_disclosure.pdf](http://www.icmje.org/coi_disclosure.pdf) (available on request from the corresponding author) and declare: no support from any organisation for the submitted work [or describe if any]; no financial relationships with any organisations that might have an interest in the submitted work in the previous three years [or describe if any], no other relationships or activities that could appear to have influenced the submitted work.

The Corresponding Author has the right to grant on behalf of all authors and does grant on behalf of all authors, an exclusive licence (or non exclusive for government employees) on a worldwide basis to the BMJ Publishing Group Ltd to permit this article (if accepted) to be published in BMJ editions and any other BMJ PGL products and sublicences such use and exploit all subsidiary rights, as set out in our licence

## **Abstract**

### **Objective**

To investigate how electronic templates shape, enable and constrain consultations about chronic disease.

### **Design**

Ethnographic case study, combining fieldnotes, video-recording, screen capture with micro-analysis of talk, body language and data entry – an approach called linguistic ethnography.

### **Setting**

Two general practices in England.

### **Participants and methods**

Ethnographic observation of administrative areas and 36 nurse-led consultations. 24 consultations directly observed; 12 consultations video-recorded, alongside computer screen capture. Consultations transcribed using conversation analysis conventions, with notes on body language and the electronic record. Analysis involved repeated rounds of viewing video, annotating fieldnotes, transcription, and micro-analysis, to identify themes. Data interpreted using discourse analysis, with attention to socio-technical theory.

### **Results**

Consultations centred explicitly or implicitly on evidence-based protocols inscribed in templates. Templates did not simply identify tasks for completion, but contributed to defining what chronic diseases were, how care was delivered and what it meant to be a patient or professional in this context. Patients' stories morphed into data bytes; the particular became generalised; the complex was made discrete, simple and manageable; and uncertainty became categorised and contained. Many consultations resembled bureaucratic encounters, primarily oriented to completing data fields. We identified a tension, sharpened by the template, between different framings of the patient – as 'individual' or as 'one of a population'. Some clinicians overcame this tension, responding creatively to prompts within a dialogue constructed around the patient's narrative.

### **Conclusions**

Despite their widespread implementation, little previous research has examined how templates are actually used in practice. Templates do not simply document the tasks of

1  
2  
3 chronic disease management but profoundly change the nature of this work. Designed to  
4 assure standards of 'quality' care they contribute to bureaucratisation of care and may  
5 marginalise aspects of quality care which lie beyond their focus. Creative work is required to  
6 avoid privileging 'institution-centred' care over patient-centred care.  
7  
8  
9  
10  
11  
12  
13  
14  
15  
16  
17  
18  
19  
20  
21  
22  
23  
24  
25  
26  
27  
28  
29  
30  
31  
32  
33  
34  
35  
36  
37  
38  
39  
40  
41  
42  
43  
44  
45  
46  
47  
48  
49  
50  
51  
52  
53  
54  
55  
56  
57  
58  
59  
60

For peer review only

## Summary

### **Article Focus**

- How do computer templates for chronic disease management shape, enable and constrain clinical consultations?
- How does the tension between different ways of framing the patient (patient as 'individual'; patient as 'one of a population') play out as clinicians use templates to support chronic disease management and meet institutional targets?

### **Key Messages**

- Electronic templates introduced to assure quality of care in chronic disease management may privilege the needs of the institution for data over the particular needs of individual patients
- Some but not all clinicians sustain a patient-centred approach through creative and flexible use of the template, while maintaining attention to the patient's narrative
- Linguistic ethnography offers potential for studying complex socio-technical practices in healthcare

### **Strengths and limitations of this study**

- Explores the *actual* social practices of working with templates at a level of detail which more conventional qualitative methods (e.g. interviews) cannot reach
- Adopts a novel methodological approach embracing the complexities of interaction between humans and technologies, whilst retaining a broad appreciation of institutional context
- Prompts new ways of conceptualising what is accomplished when templates are used
- We prioritised depth of analysis over breadth. The two general practices we studied may not be typical of all practices in how they approach chronic disease management or technology use.

## Introduction

The electronic patient record underpins one of the cornerstones of chronic disease management, the “three Rs” of registration, recall and regular review.<sup>1</sup> Information technology is seen as key to a high-performing chronic care system.<sup>2</sup> It facilitates effective population management (e.g. disease registration and population risk stratification), supports communication between professionals, and provides data to inform the continuous quality improvement cycle.<sup>2</sup> Over 2000 primary studies, mostly randomised trials, have measured the impact of the electronic record on different aspects of care<sup>3</sup> but many had methodological flaws and questions remain about the circumstances in which the benefits of these technologies outweigh their limitations.<sup>4</sup> Nevertheless it is widely assumed that electronic records and related technologies will result in better care for patients and efficiency savings for clinicians.<sup>5</sup>

In many chronic diseases, clinical trials and cohort studies have produced robust evidence-based guidance on what works – and what may happen if particular conditions or risk factors go untreated.<sup>6</sup> In the UK, best practice in prevention, surveillance and therapy is summarised in patient pathways, guidelines and decision support algorithms which are routinely available on the clinician’s desktop computer as pull-down menus, pop-up prompts and templates (electronic forms).<sup>7</sup> These tools support structured management of individual patients (‘primary use’ of data) and also produce aggregated data on costs and/or organisational performance (‘secondary use’).<sup>8</sup> The latter may be linked to incentives, for example the UK Quality and Outcomes Framework (QOF).<sup>9</sup>

In the UK, six out of ten adults report having an incurable long-term condition; it is not unusual for an 80-year old to have five or six such conditions.<sup>7;10</sup> Concerns are emerging about fragmentation of care,<sup>11;12</sup> and the dangers of the ‘vertical’ disease-specific focus implied in translational research and in clinical guidelines.<sup>13</sup> What constitutes ‘best care’ for patients with multimorbidity is poorly understood<sup>14</sup> and has been identified as a priority area for further research.<sup>15</sup>

It is often said that “chronic diseases require a complex response”,<sup>10</sup> and that structured care, for example by using checklists or templates, is a mark of quality in chronic disease management. Templates have also been identified as a way of streamlining consultations and establishing routines.<sup>16</sup> Templates are formal tools which enable care to be undertaken systematically and which open up scope for manipulating, aggregating, transporting and sharing data. Although structured care and attempts to standardise clinical terminology pre-



1  
2  
3 dated the introduction of electronic records, these technologies introduce new possibilities  
4 for such care. For example, a quick search can identify not only the proportion of diabetic  
5 patients with an HbA1c below an institutionally defined target, but also which *particular*  
6 individuals have been given smoking advice (or not) within a defined time period (or at least  
7 the extent to which such activity has been documented). 'Off target' individuals can be  
8 identified quickly and in an automated way, triggering responses designed to 'chase'  
9 patients, and constructing a new category of 'patient' defined by the practice's procedures –  
10 that is, someone whose data fields are incomplete or whose values are out of range.<sup>17;18</sup>  
11  
12  
13  
14  
15

16  
17 From the patient's perspective, chronic illness is a unique personal experience which may  
18 involve pain, disability, loss of status, reduced income and a heroic struggle to retain dignity,  
19 rebuild identity and live a moral life in the face of adversity.<sup>19-22</sup> The consultation is an  
20 opportunity for the patient to tell their story to an involved listener<sup>23</sup> – who in turn shapes the  
21 telling and is witness to their suffering.<sup>24;25</sup> Constructing a narrative in the context of an  
22 ongoing therapeutic relationship is one way in which a patient makes sense of their  
23 illness.<sup>26;27</sup> Conceptualised this way, the consultation focuses on a patient's specific,  
24 particular experience – the 'here and now'. As Balint emphasised, continuity of care in the  
25 general practice relationship provides repeated opportunities for recounting the illness  
26 narrative, helping to build the therapeutic relationship.<sup>28</sup>  
27  
28  
29  
30  
31  
32

33  
34 The rationalisation of chronic disease management, guided by a limited set of coded entries  
35 on the electronic record exposes what some authors have termed a rationality-reality gap<sup>29</sup>  
36 or fatal paradox<sup>30</sup> between the inherently messy and unique nature of healthcare work and  
37 the standardisation of this work. Central to this paradox is a tension between different ways  
38 of framing the patient – the patient as an individual whose illness narrative is unique, and the  
39 patient as one of a population, all of whom need standardised management of the 'same'  
40 disease.<sup>31</sup>  
41  
42  
43  
44

45  
46 In this study, we sought to address two questions. First, how do computer templates for  
47 chronic disease management shape, enable and constrain clinical consultations? Second,  
48 how does the tension between different ways of framing the patient (patient as 'individual';  
49 patient as 'one of a population') play out as clinicians draw on these templates to support  
50 such consultations and meet institutional targets? We adopted a socio-technical approach,  
51 meaning we focussed on the dynamic, contingent interaction between humans and  
52 technologies rather than assuming technology is itself 'causal' of specific effects.<sup>32-34</sup> From  
53 this perspective the electronic record is not simply a collection of hardware and software on  
54 the clinician's desk but is a complex "social substance" definable in terms of the properties of  
55  
56  
57  
58  
59  
60

1  
2  
3 a social world.<sup>35</sup> The template is itself a manifestation of complex socio-technical practices  
4 and relationships involving systems engineers, clinical software designers and others, whose  
5 assumptions about chronic disease management practices become inscribed (and reified) in  
6 the template. In this study we sought to illuminate how and to what extent templates – and  
7 the socio-technical practices of which they are a part – contribute to what is accomplished in  
8 the clinic.  
9  
10  
11  
12  
13

## 14 **Methods**

15  
16 The study was part of the Healthcare Electronic Records in Organisations (HERO) study,  
17 funded by the UK Medical Research Council under a ‘new methodologies’ call which  
18 highlighted the limitations of experimental studies for certain research questions. Details of  
19 governance and ethical approval for the study have been published<sup>36</sup> and the methods used  
20 in this part of the HERO study have been described in detail elsewhere and summarised  
21 briefly here.<sup>31</sup>  
22  
23  
24  
25  
26  
27

28  
29 DS (a general practitioner) conducted 8 months (187 hours) of ethnographic observation in  
30 two UK general practices, in clinical and administrative areas. The practices served mixed  
31 populations of approximately 11800 and 12600 patients respectively, both used the EMIS-LV  
32 clinical system (the most widely used system in the UK) and both practices scored highly in  
33 the Quality and Outcomes Framework.  
34  
35  
36  
37

38 Observations began in what the sociologist Erving Goffman called the ‘backstage’<sup>37</sup> regions  
39 of practice (that is, areas which are not usually ‘patient facing’ e.g. administrative offices),  
40 shadowing individuals as they worked. The researcher made detailed fieldnotes and elicited  
41 narratives from staff, seeking to identify “*What is being accomplished here?*” Documents  
42 (e.g. recall letters, patient leaflets) relevant to chronic disease management were collected.  
43 This naturalistic approach seeks to generate in-depth knowledge about how and why people  
44 behave as they do in particular settings, whilst minimising the impact of the researcher.<sup>38</sup>  
45 Observation then moved to the ‘front stage’ – that is, the main focus of clinician-patient  
46 communication – the clinical consultation.<sup>37</sup> 24 chronic disease management consultations  
47 were observed, then 12 were video-recorded, with parallel screen capture of the computer  
48 display. The two video streams were merged and synchronised using video editing software  
49 (Adobe® Premier Elements 4) allowing us to observe the ‘electronic record-in-use’.  
50 Recording began when the record was accessed (often several minutes before the patient  
51 entered the room).  
52  
53  
54  
55  
56  
57  
58  
59  
60

1  
2  
3  
4 Our work is a contribution to an emerging field called ‘linguistic ethnography’ bringing  
5 together a focus on language – in this case a microanalysis of the unfolding consultation –  
6 with ethnographic appreciation of the wider institutional context.<sup>39</sup> It is underpinned by a  
7 social constructionist perspective, that is to say language (which incorporates actions as well  
8 as words) does not just reflect or express intentions or decisions (the *representational* role of  
9 language) but *makes* them (the *constitutive* role of language) – talk *is* work.<sup>40</sup> Our frame of  
10 reference is interpretivist; we seek to explore the meaning-making of our research  
11 participants as they engage in the actual practices of chronic disease management.  
12  
13  
14  
15  
16

17  
18 Our iterative approach to data transcription, annotation and analysis is shown in Figure 1.  
19 Fieldnotes were annotated, and videos viewed multiple times. Transcription incorporated  
20 Jefferson conventions for the spoken word (as in conversation analysis – see Appendix),<sup>41</sup> to  
21 which we added a simple horizontal arrow (→ or ↔) to indicate direction of gaze, notes on  
22 bodily conduct, and notes on the electronic record, using time as an anchor.<sup>42</sup> We mapped  
23 consultations and conducted a detailed micro-analysis of the moment-by-moment unfolding  
24 of the interactions. This included paying attention to the *material* features of the EPR (e.g.  
25 screen, keyboard) and the *textual* features (displayed medical information, prompts, alerts,  
26 fields for completion). We identified *focal* themes relevant to the professional domain (such  
27 as agenda setting) and *analytic* themes (from linguistics and sociology) such as Goffman’s  
28 notion of ‘involvement’.<sup>40</sup> Goffman defines involvement as sustaining “*cognitive and affective*  
29 *engrossment*” in an activity, or the “*mobilization of one’s psychobiological resources*” (page  
30 36).<sup>23</sup>  
31  
32  
33  
34  
35  
36  
37  
38

39 [FIGURE 1 ABOUT HERE]  
40  
41  
42

## 43 **Results**

44  
45 The dataset comprised over 400 pages of ethnographic fieldnotes (of which around 15%  
46 related directly to chronic disease management) and 12 video-recordings with screen  
47 capture (of a total of 54 recordings incorporating all aspects of general practice). Below, we  
48 illustrate our findings with selected data extracts and accompanying analysis, drawn from a  
49 variety of sources including ethnographic fieldnotes, transcripts and practice documents.  
50  
51  
52  
53  
54

### 55 **The electronic record shapes how disease is defined**

56 In both practices, chronic disease management was organised so that each of a patient’s  
57 chronic diseases resulted in a different occasion for care, often with a different nurse using a  
58  
59  
60

1  
2  
3 different template. This arrangement assumed that patients (and nurses) could distinguish  
4 features of one chronic disease from another in the face of multiple morbidities. A common  
5 way for the nurse to frame the purpose and scope of the consultation was to use statements  
6 such as “*how have things been from the diabetes point of view?*”, or more simply  
7 “*so...asthma review*”. To use Goodwin’s terminology, these questions do the work of  
8 establishing what is ‘figure’ (relevant, salient) and what is ‘ground’ (less relevant to the  
9 enquiry).<sup>43</sup> Occasionally this separation of the patient into different chronic diseases was  
10 identified as potentially problematic. An example is shown in Box 1.  
11  
12  
13  
14

15  
16 [INSERT BOX 1 ABOUT HERE]  
17

18  
19 The nurse’s statement (Box 1) “*I know you have a lot of other things going on but we’ve*  
20 *called you in to look at your heart*” performs two contrasting functions. On the one hand she  
21 acknowledges the difficulty inherent in separating out his ‘heart’ problem from his other  
22 illnesses and wider experience, making it legitimate for the patient to frame his heart  
23 problems in a broader context. However, in the next part of her utterance “*but we’ve called*  
24 *you in to look at your heart*” she exhibits what discourse analysts call a ‘scale jump’.<sup>44</sup> She  
25 shifts quickly from an individual, unique ‘here and now’ framing (“*I know you have...*”) to a  
26 more general institutional framing (“*we’ve called you in...*”). This shift indexes what is most  
27 relevant and implies certain limits around what may happen in this consultation.  
28  
29  
30  
31  
32

33  
34 The patient responds by juxtaposing his prime concerns with the ‘core’ concerns of this  
35 clinic. First, he rarely uses his angina tablet – but only because his mobility problems  
36 outweigh his angina. Then his concern about simvastatin moves swiftly into a complaint  
37 about his hearing aids. Neither mobility nor deafness are pursued by the nurse (or recorded  
38 on the electronic record); they are ‘unremarkable’ problems in this (heart) clinic. It is not  
39 simply that these concerns remain unexplored *because* there is no field dedicated to them in  
40 the template. More subtly, the practice of using a template shapes how disease and illness  
41 experience are made sense of in this environment.  
42  
43  
44  
45  
46

47  
48 The template is not merely organised around a single disease entity, but around a particular  
49 *version* of this disease, reflecting the assumptions of those responsible for designing the  
50 template. For example, diabetes in all its complexity is rationalised in terms of a series of  
51 codes e.g. weight, units of alcohol, blood pressure, lower limb pulses (present or absent) –  
52 with minimal (if any) supporting free text. The primacy of the ‘measurable’ was often made  
53 explicit in the consultation. For example, three minutes into a diabetes consultation, one  
54 nurse faced the computer screen as she announced “*CAN WE DO a few measurements*  
55  
56  
57  
58  
59  
60

1  
2  
3 *today then just to see (0.2) uhm where everything is*". Here, not only are "measurements"  
4 equated with what is to be recorded on the electronic record, but it is implied that they will  
5 reveal "everything". Another nurse – in an asthma clinic – remarked (as a patient moved to  
6 leave) "*Hang on a minute. I need to pop these in here (turning to computer)...this is a whole*  
7 *set of measurements which tells us where your lungs are now*".  
8  
9

10  
11  
12 Nurses frequently engaged in the kind of activities which characterise bureaucratic  
13 encounters.<sup>45</sup> For example, deviations from the institutional agenda were brief; patients' talk  
14 was interpreted in direct relation to the template (an example of an institutional script, or a  
15 particular way of accounting for practices),<sup>46</sup> and talk was steered in particular institutionally-  
16 relevant directions. For example, in Table 1, from a diabetic clinic, the nurse anticipates an  
17 upcoming field in the template ('Depression Screening'). At the time, the Quality and  
18 Outcomes Framework required case finding for depression amongst diabetic patients, using  
19 two standard questions (*During the last month have you often been bothered by feeling*  
20 *down, depressed or hopeless? During the last month, have you often been bothered by*  
21 *having little interest or pleasure in doing things?*) Although we observed no examples of this  
22 precise wording being used, nurses often incorporated their own versions, enquiring about  
23 the 'mood' or feeling 'down'. The transcript in Table 1 shows the nurse's handling of these  
24 questions. In this extract she refers back to a brief account of whiskey drinking, which the  
25 patient had offered about seven minutes earlier:  
26  
27  
28  
29  
30  
31  
32

33  
34  
35 Patient: "*well I look a- I look after myself I drink whiskey to counteract the cigarettes y'know*"

36 Nurse: "*do you [laugh] a whiskey a day?*"

37  
38 Patient: "yeh"  
39  
40

41 [INSERT TABLE 1 ABOUT HERE]  
42  
43

44 In Table 1, the question "*Does the diabetes get you down Mr C?*" is met by a relatively long  
45 pause (in conversational terms). The patient frowns and says he gets "*bored with life*"  
46 widening the perspective towards his broader life experience. The nurse responds with a  
47 question which invites elaboration, but simultaneously refocuses on a narrow diabetes-  
48 relevant cause (*the food*). This is an awkward moment and prompts the patient to withdraw  
49 his gaze, laugh ironically, lift his jumper and say, quietly "*ah well never mind*" –  
50 communicating disappointment. A brief but poignant narrative unfolds, painting a picture of a  
51 man who has reluctantly made lifestyle changes, restricting his enjoyment of life. Being a  
52 "*drinking man*" was part of his (male) identity and conjures up a social life around alcohol  
53 ("*when I had to give up the beer I had to give up an awful lot of other things:*"). At 19.11 the  
54  
55  
56  
57  
58  
59  
60

1  
2  
3 nurse slows and quietens her speech, perhaps encouraging elaboration, but the narrow  
4 biomedical focus of the template items is restored from 19.13 onwards, the patient justifying  
5 his whiskey by reference to its minimal 'sugar' content, which the nurse re-contextualises  
6 into even more 'scientific' terms – 'carbohydrates' and 'volumes'.  
7  
8  
9

10  
11 After the patient leaves, the nurse corrects the 'alcohol' record she had entered earlier. She  
12 replaces "14U" (copied from the previous year's entry in the template) with "7U". "A whiskey  
13 a day?" becomes 'one unit', in what is an uncritical shift from an *unquantified* volume of  
14 whiskey to an (apparently) *quantified* one. The complex interactions between the patient's  
15 diabetes, his identity as a "*drinking man*", his losses and his "*boredom with life*" are reduced  
16 to an institutional account which reads simply (and potentially misleadingly): "Depression  
17 screen – 'Y'; Alcohol – 7 units". The construction of particular versions of diabetes  
18 contributes to constructions of particular kinds of patient, discussed further below.  
19  
20  
21  
22  
23

#### 24 **The electronic record shapes how care is delivered**

25  
26 The electronic record shapes care delivery in several ways. It is often the prompt to care,  
27 defined by 'overdue diary entries', overdue 'medication review' dates, and audits by a tool  
28 called 'Population Manager' identifying patients with missing QOF data ("*we've called you in*"  
29 – Box 1). Patients attend regularly, or may sign disclaimers, in a process which is institution-  
30 led, rather than patient-initiated. For example, in one practice letters of invitation to the  
31 'cardiovascular check up' were signed off by '*Practice Administration*' (not a clinician) and  
32 couched in institutional terms ("*We are now regularly reviewing all patients who have angina*  
33 *or who have had a heart attack. As a result of this we would like you to attend a health*  
34 *check...[further appointment details]. There is no need to be concerned about this*  
35 *appointment we are just striving to maintain the standards of care we provide for you.*") The  
36 potential benefit to the patient is implicit and abstract rather than explicit and specific. For  
37 example, the justification for the check is presented only in terms of '*maintaining the*  
38 *standards*' or '*regular*' procedure. Despite receiving written invitations, patients often  
39 remained confused about why they had been summoned ("*What do you want to see me*  
40 *about then?*").  
41  
42  
43  
44  
45  
46  
47  
48

49  
50 The requirement for data was – occasionally – the primary reason for the consultation. In  
51 one cardiovascular clinic a patient began by apologising for telephoning three days earlier to  
52 check whether her review was necessary. She had been reviewed in the hospital cardiology  
53 clinic the same week. The nurse responded by explaining that the practice is not always sent  
54 the information by the hospital "*and we have to have our records up to date.*" What is  
55 interesting here is not so much that the patient may well have had to attend two very similar  
56  
57  
58  
59  
60

1  
2  
3 appointments in one week, but that the need to keep the record 'up to date' is presented as  
4 adequate and sufficient reason for the appointment. The 'need' for data seemed to outweigh  
5 any need that this particular patient felt (or necessarily had) for care.  
6  
7

8  
9 These examples illustrate that whilst on the one hand the electronic patient record facilitates  
10 the regular recall and review which are critical to a high quality chronic disease programme<sup>47</sup>  
11 there are potential pitfalls to a highly automated recall system, especially if it is disconnected  
12 from the wider set of relationships within which care is delivered, or if the rationale behind it  
13 does not make sense to individual patients.  
14  
15

16  
17 The electronic record also shapes and constrains how the consultation unfolds moment-by-  
18 moment. Chronic disease consultations often (though not always) took a linear and  
19 standardised format. Consultations tended to start and finish with the same questions, and  
20 focus on information gathering and documentation. One consultation was interrupted on two  
21 occasions by the patient standing up to take his leave, the nurse advising "*You can't go yet*  
22 *(laughing) ...we're not finished yet*". It was common for nurses to face the computer screen  
23 as they explained the reason for 'calling the patient in', and the 'orderliness' of the clinic was  
24 often made explicit (e.g. "*We'll start with your blood pressure*"). Table 2 shows a detailed  
25 transcript revealing this institutional ordering in an asthma clinic.  
26  
27  
28  
29  
30  
31

32  
33 [INSERT TABLE 2 ABOUT HERE]  
34  
35

36 In this example (Table 2), the nurse frames the consultation as an *assessment*, firstly to see  
37 how "*your asthma's doing*" (an assessment of the asthma) which she then reformulates as  
38 "*what you're doing with it when it's good, what you do with it when it's bad*" (an assessment  
39 of the patient's practices). This metaphorical separation of disease from patient was  
40 common. The use of the word "*assessment*" sets an evaluative tone and anticipates an  
41 enquiry which incorporates smoking status, inhaler technique, concordance with medication  
42 and peak flow measurement. The nurse emphasises (1:08 and 1:19) that it is *really* or *very*  
43 straightforward, and at 1:13 she counts on her fingers a three-part list, flagging the linearity  
44 of what is to follow and setting out what she and the patient should achieve. It might be  
45 interpreted as reassurance, but this is a reassurance about what he may expect of the  
46 *structure* of the clinic, not that his specific concerns will be addressed. Following this data  
47 extract, the nurse gestures towards the computer as she explains "*What I've got here is*  
48 *some questions that I – I need to ask you...they're fairly straightforward ones but what they*  
49 *tend to do with is that they will flag up whether there >actually< we have got what w- what I*  
50 *would call breakthrough symptoms.*" The institutional imperative is clear ("*I need to ask you*")  
51  
52  
53  
54  
55  
56  
57  
58  
59  
60

1  
2  
3 and again she highlights the “straightforward” nature of the task, as she identifies the  
4 template as the origin of the questions. As the patient begins to demonstrate his inhaler use,  
5 he coughs loudly five times, beats his chest demonstrably with his hand and announces:  
6  
7

8  
9 Patient: *“I do suffer very badly from phlegm in the mornings...which I presume is part  
10 and parcel of having asthma.”*  
11

12 Nurse: *“It can be (.) yeah which (0.4) anyway I – we’ll talk about that in a  
13 minute...we’ll do the inhaler first.”*  
14  
15

16  
17 Despite weaving his own concerns into the assessment of ‘inhaler technique’ and using  
18 elaborate gestures for emphasis, the nurse steers the patient’s activity back to the  
19 institutional script and does not revisit the issue of the morning phlegm. She later goes on to  
20 enquire specifically about asthma symptoms, but not until almost 16 minutes into the 19  
21 minute consultation...when prompted by a template field reading “night symptoms”.  
22  
23  
24

### 25 26 **The electronic record shapes what it means to be a patient**

27 The template contributes to the construction of ‘institutional’ versions of the patient and may  
28 make it difficult for professionals to retain a perspective on the unique individual. One nurse  
29 said that the structure can make it difficult to “take a step back” – that some patients return  
30 annually for asthma checks even though she wonders whether they are definitely asthmatic  
31 at all (“once they have acquired a diagnosis they just keep coming back”). Whilst the asthma  
32 clinic may seem a reasonable setting in which to review a patient whose diagnosis is  
33 provisional or uncertain, the template does not handle such ambiguity well, and the recall  
34 procedures behind it can lead to the ‘production’ of consultations and the production of  
35 patienthood (the ‘asthma patient’). There is considerable scope for unhelpful, potentially  
36 incorrect labelling of patients. An example is shown in the ethnographic fieldnotes in Box 2.  
37  
38  
39  
40  
41  
42

43  
44  
45 [INSERT BOX 2 ABOUT HERE]  
46

47 Putting aside the absurdity that a 2-year-old has a Read code for “Never smoked tobacco” in  
48 his record, the example in Box 2 shows the disparity between the individual narrative that  
49 was built in the clinic and the “minimum data set” in the institutional account.<sup>48</sup> It also shows  
50 how the expressed ambiguity about the asthma diagnosis is wiped out (and not alluded to) in  
51 the record – numerous asthma Read codes are entered. Whilst this is sure to result in  
52 regular invitations to the clinic, the institutional ‘truth’ bears little resemblance to the reality it  
53 seeks to record. The contrast between the mother’s relief at the *uncertainty* of the diagnosis,  
54  
55  
56  
57  
58  
59  
60



1  
2  
3 and the *certainty* which was constructed in the record is striking. More subtle, transient  
4 moments of ambiguity, which required the shaping of patients' accounts into an inflexible  
5 (often binary) categorisation, were common (e.g. a patient's hesitant 'not really' becomes  
6 'no').  
7  
8

### 10 **The electronic record shapes what it means to be a clinician**

11  
12 The opportunity for nurses to develop new areas of expertise in chronic disease  
13 management is frequently described in terms of 'role-expansion', 'professional  
14 empowerment, or "*Liberating the Talents*".<sup>49</sup> As the disease areas covered by the Quality  
15 and Outcomes Framework have increased, so has the variety of nurse-led, disease-specific  
16 consultations on offer. In this study, nurses were often defined by chronic disease specialty.  
17 For example, in one practice, photographs of the nurses in the waiting room had their  
18 disease-specific expertise listed alongside (e.g. Christine - Asthma). One practice newsletter  
19 read: "*Our practice nurses receive special training to monitor people with chronic diseases  
20 and to carry out many procedures independent of doctors.*" This entry not only constructs  
21 chronic disease as 'nursing work' but describes a 'monitoring' role which sounds different to  
22 the 'care' we may traditionally associate with nurses looking after the chronically sick. With  
23 nurses thus defined, general practitioners took on the role of 'trouble-shooter' or  
24 consultant,<sup>50</sup> called upon when more complex problems arose. In one practice, healthcare  
25 assistants conducted cardiovascular and hypertension reviews. Although able to gather  
26 information needed to *inform* chronic disease management (e.g. blood pressure, details of  
27 smoking) healthcare assistants are not clinically qualified. This 'redistribution' of chronic  
28 disease management to the least qualified (and least costly) team member has been  
29 previously described and shifts the meaning of the term 'management' towards one of  
30 managing data rather than patients.<sup>18:50</sup>  
31  
32  
33  
34  
35  
36  
37  
38  
39  
40  
41  
42

43 The extensive use of templates as a way of delivering chronic disease managements was  
44 rarely questioned. The little that was said was broadly positive, and echoed the "monitoring"  
45 perspective conveyed in the newsletter ("*templates encourage us to get to grips with the  
46 management of microalbuminuria in diabetes and take a more aggressive stance towards  
47 blood pressure control*"). Several nurses suggested they relied on templates and might  
48 easily forget things without them. However, one nurse said she tried to avoid relying too  
49 heavily on the template, as doing so tended to result in her "*losing her train of thought*"; she  
50 preferred to jot notes on paper to add to the template later. Some specific difficulties were  
51 voiced, such as the perception that important things may not be documented "*because there  
52 is nowhere in the template to put it*", and "*you sometimes become so absorbed in the  
53 template that you can miss what is right in front of you in the patient.*" On one occasion  
54  
55  
56  
57  
58  
59  
60

1  
2  
3 when the computer crashed midway through a cardiovascular check, the nurse apologised in  
4 advance (“*I’ll have to do it a little out of order because I’ve no computer*”) and again  
5 afterwards (“*I’m sorry it’s been such a higgledy-piggledy consultation*”). This incident  
6 highlighted the extent to which her work had become interwoven with technology use. It  
7 seems unlikely that this senior, experienced nurse could not do a cardiovascular check  
8 without the prompts before her eyes. Rather it was because her embodied practices had  
9 become so finely tuned to incorporate the technology that to conduct a consultation without  
10 had become almost impossible.  
11  
12  
13  
14  
15

16  
17 In one practice, an information technology manager was responsible for developing and  
18 maintaining computer templates, and he identified templates as a fundamental characteristic  
19 of quality care. A private company who had recently taken over the management of a local  
20 ‘underperforming’ practice was employing one of his GP colleagues to improve practice  
21 systems. He explained that “*they were very impressed with our templating*”; the doctor had  
22 duly provided copies of their templates for the ‘underperforming’ practice. The integration of  
23 templates (and a new word – “*templating*”) was presented not only as a *feature* of good  
24 practice, but as potentially constitutive of good practice in an organisation which was  
25 otherwise failing – a transferable ‘good’.  
26  
27  
28  
29  
30  
31

32 The template contributed to redefining ‘professional vision’<sup>43</sup> by encouraging particular ways  
33 of looking, categorising and sense-making, fostering a particular orientation to the world,  
34 captured in Goodwin’s words: “*When disparate events are viewed through a single coding  
35 scheme, equivalent observations become possible*” (page 608).<sup>43</sup> For example areas of  
36 institutional relevance (such as those which attract points in the Quality and Outcomes  
37 Framework) were often privileged over patients’ more immediate concerns. The template  
38 shaped not only *what* was relevant to record, but also *how* this was recorded. For example  
39 symptoms were recorded as either ‘present’ or ‘absent’ when patients described a much  
40 more complex reality. The clarification of a patient’s experience ‘in general’ was sought more  
41 readily than ‘particular’ experiences. The template brought new definitions of nursing and GP  
42 work, new conceptualisations of practice and new appreciations of what constituted ‘good’  
43 practice.  
44  
45  
46  
47  
48  
49  
50  
51

### 52 **Using the template creatively**

53 Some nurses displayed exceptional creativity in how they used the template. We illustrate  
54 this by reference to Tables 3 and 4 which show two extracts from a single consultation in the  
55 asthma clinic. In this consultation, the patient can see the screen if he turns his head slightly,  
56 but the nurse does not start to complete the template until ten minutes into the consultation.  
57  
58  
59  
60

1  
2  
3 Until then, she faces him across the corner of the desk, occasionally jotting notes on a paper  
4 placed between them.  
5  
6

7 [INSERT TABLE 3 ABOUT HERE]  
8  
9

10 The nurse uses several strategies to elicit a narrative at the outset (Table 3) beginning with  
11 an open invitation “*tell me ...*” The word “tell” invites a story, and she shifts into a posture  
12 displaying readiness to listen, moving her chair away from her desk (and the computer and  
13 her notes). The patient hesitates and there are some relatively long pauses in his telling, but  
14 she refrains from filling these with anything other than tokens of attentiveness. She mirrors  
15 the patient’s laugh and shrug of the shoulders from 1:10 to 1:15 in a way which is effective in  
16 encouraging him to tell some more.  
17  
18  
19  
20  
21

22 She goes on to encourage the patient to describe his inhaler use, and learns that he had  
23 recently woken up short of breath. His inhaler had not worked well and he could not get back  
24 to sleep. She makes occasional notes, describes aloud what she is noting, then summarises  
25 the story which the patient confirms. Having established some confusion over when he  
26 should be using each of his two inhalers, she uses a picture of the respiratory tract as part of  
27 her explanation, saying “*I think if you know how the drug works on your body it makes sense*  
28 *how to use them.*” She goes on to check his height and peak flow rate, then joins him (“*let’s*  
29 *have a look*”) as they cluster around the peak flow meter, each holding one end of it. The  
30 nurse says that it wasn’t very good and that he can do better – which makes him laugh –  
31 then she demonstrates how to do it. After his second attempt they again cluster round the  
32 peak flow meter (N: “*tha::t was a bit bette::r ...LOOK four hundred a::nd eighty.*”) After a  
33 further attempt the nurse says “*Excellent. Well done. What we got? There we go. LOOK five*  
34 *hundred and thirty that time.*”  
35  
36  
37  
38  
39  
40  
41  
42  
43

44 The nurse and patient are fully involved in this activity, in Goffman’s sense of being both  
45 cognitively and affectively engaged.<sup>23</sup> The nurse’s talk is inclusive (*let’s, we, what we got,*  
46 *there we go*) and her bodily conduct encourages a joint engagement in reading the peak  
47 flow meter. Having already created a collaborative environment, she turns to the computer  
48 for the first time almost ten minutes into the consultation (Table 4, 10.37).  
49  
50  
51

52 [INSERT TABLE 4 ABOUT HERE]  
53  
54

55 Again the nurse uses inclusive language as she orients towards the screen, inviting the  
56 patient to look. Between 10:39 and 10:43 she makes a deliberate show of navigating  
57  
58  
59  
60

1  
2  
3 towards the asthma template. She enters his height, points at the screen, makes a joke. By  
4 making the template deliberately visible and socialising around it she retains control over the  
5 progress of the consultation and legitimises her need to attend to some institutional work.  
6 But by involving the patient in the recording activity (not literally, but through making it a  
7 shared endeavour and using much inclusive language) she effectively maintains a patient-  
8 centred approach whilst briefly attending to institutional requirements.  
9  
10  
11

12  
13 She invites further collaboration in making the template entry at 11:14 onwards (*five thirty*  
14 *was your best wasn't it*). The patient does not initially respond although he continues  
15 watching the screen. The computer automatically displays his "predicted peak flow rate  
16 (PEFR)". The nurse evaluates the measurement as a "*little bit under...but not too bad*",  
17 minimising any sense of trouble. But the mismatch between his 'actual' and his 'predicted'  
18 result prompts the nurse to reformulate her question to one which is more demanding of an  
19 answer ("*was five thirty your best?*") When the patient hesitates and suggests it may have  
20 been higher, the nurse suggests a recheck. This confirms the measurement, but the act of  
21 repeating it displays a collaborative approach. Neither nurse nor patient's account is taken  
22 as 'truth' – a re-measurement settles the matter. In summary, this nurse is successful in  
23 eliciting a narrative, whilst also making the bureaucratic requirements deliberately visible.  
24 She skilfully minimises the distance between 'individual' and 'institutional' framings of the  
25 patient.<sup>31</sup>  
26  
27  
28  
29  
30  
31  
32  
33  
34

35 A different nurse described herself as a "*paper person*" and yet also used the words  
36 "*template driven*" to describe her work. She said she had found it impossible to combine  
37 "*getting through it all*" with what she regarded as a patient-centred approach. She had  
38 negotiated with her employing doctors that her diabetes appointments were 30 minutes long  
39 (instead of 15 minutes) "*otherwise I would have just been completing the boxes with no time*  
40 *for the patient*". In this statement she highlighted a perceived gap between the task of being  
41 "for" the patient and the demands of the template. This nurse went to great lengths to  
42 minimise her need to look at the computer during her consultations, seizing brief  
43 opportunities as they arose (e.g. as patients removed socks, for example). She often placed  
44 her left hand on the patient's arm as she rotated her chair to look at the screen, keeping it  
45 there as she typed with her right hand – an awkward posture, but one which allowed her to  
46 maintain a physical connection to the patient as she attended to the template. She always  
47 went into surgery thirty minutes before her clinic was due to start, to prepare a written page  
48 of notes for each patient in her notebook. She meticulously studied the record of each  
49 patient she was anticipating, and copied blood results and other information she thought she  
50 may need to refer to. She 'knew' the template, and would frequently anticipate the next field  
51  
52  
53  
54  
55  
56  
57  
58  
59  
60

1  
2  
3 in the template before displaying it on the screen, weaving it into the consultation whilst  
4 keeping it relatively 'invisible' to patients.  
5  
6

7  
8 In sociological terms, this particular nurse had internalised the template – working *with it* in a  
9 symbolic sense, but marginalising it from her embodied activity in the interaction. Her  
10 performed identity was as a 'paper person' who preferred to be "for" the patient in this new  
11 template-oriented 'field'<sup>51;52</sup> of practice, but the template was indeed central to her practice  
12 (she was "template driven"). She was 'driven' in the sense that she ensured that she  
13 completed it – as demanded by the institution – but also 'driven' to find creative ways of  
14 working around it. It had become part of a new professional habitus,<sup>51;52</sup> which helped to  
15 define her normative behaviours and expectations. She took the burden of managing the  
16 individual / institutional tension, but in this case it came at an opportunity cost to herself in  
17 terms of personal time, and a financial cost to her employer (since her consultations were  
18 now taking twice as long).  
19  
20  
21  
22  
23  
24  
25

26 These examples of exemplary practice are important evidence that the technology is by no  
27 means *deterministic* of practices, but that there is always scope for practitioners to work with  
28 technologies in ways which preserve the 'relational' aspects of care and maintain full  
29 involvement with the patient.<sup>53</sup> The electronic record *shapes* but doesn't *make*; it *constrains*  
30 but does not *prohibit*; it *makes possible* but does not necessarily *insist*.  
31  
32  
33  
34  
35

## 36 **Discussion**

### 37 **Summary of findings**

38  
39 In this paper we have focussed on the detailed practices of using computer templates in  
40 chronic disease management in UK general practice. In particular, we have highlighted the  
41 tension between different ways of framing the patient, and the requirement on clinicians  
42 (nurses especially) to sustain a dual orientation to both individual patient and institutional  
43 imperatives. This pressure to 'fit' unique individuals into institutional 'boxes' or to weave a  
44 bureaucratic process through a personal encounter<sup>18;54</sup> is evident at the macro-level of clinic  
45 organisation and in the moment-by-moment detail of clinical interaction, even down to the  
46 small gestures and nuance of talk. We have argued that electronic templates make a  
47 significant contribution to four interrelated phenomena: how disease is defined; how care is  
48 delivered; what it means to be a patient; what it means to be a clinician. In other words, the  
49 use of templates changes the very nature of what it means to 'care' in the contemporary  
50 chronic disease clinic. As we have seen above, 'care' is often reformulated as 'carrying out  
51  
52  
53  
54  
55  
56  
57  
58  
59  
60

1  
2  
3 procedures' and stripped of the relational aspects of the word 'care'. The template can be  
4 seen to do *definitional* work.  
5  
6

7  
8 The template is not just a simple faithful record of what went on. Nor is it just an aide-  
9 mémoire – though it may ensure, for example, that foot pulses are palpated and blood  
10 pressures taken (important aspects of diabetes care) and it is quite likely that these will be  
11 done in the order set out in the template. The template does not simply identify things which  
12 must be done but comes to define what chronic diseases *are*. On the one hand, the template  
13 is an impoverished 'squeezed in'<sup>55</sup> record of the encounter. It is where patients' stories  
14 morph into bytes of data; the particular becomes generalised; the complex is made discrete,  
15 simple and manageable, and uncertainty becomes categorised and contained. On the other  
16 hand, the template is *integral* to the consultation, and actively shapes what goes on,  
17 sustaining normative standards which are realised through consensus and performed daily  
18 through social practices. The work of transforming stories into data – and erasing ambiguity  
19 – is in itself complex interactional work for both clinician and patient. However this does not  
20 necessarily constitute the 'complex' response to a 'complex' problem as envisaged by Nolte  
21 et al, nor does it sit comfortably alongside the political rhetoric of 'nurse empowerment'.<sup>10 49</sup>  
22 This 'new' skilled human work does not appear in the completed template, and seems to go  
23 unrecognised – even by those who are engaged daily in doing it.  
24  
25  
26  
27  
28  
29  
30  
31  
32

33  
34 At no point in our field work did we encounter any suggestion from participants that the care  
35 of patients with chronic diseases might be done otherwise. Arguably templates are taken-for-  
36 granted as part of 'good' chronic disease management. Nurses vary in their approaches, and  
37 individual nurses used different strategies within and across consultations according to  
38 emergent local contingencies. This is unsurprising. The constraints imposed by the template,  
39 and the inherent 'rationality-reality' gap<sup>29</sup> can be overcome (and our data suggest that they  
40 sometimes are) but this demands exceptional creativity. We have described one nurse's  
41 collaboration with a patient around the template and another who succeeded in  
42 simultaneously *internalising and excluding* the template. However these examples were  
43 unusual, and draw attention to what Blommaert calls "*creativity within constraints*" (page  
44 107),<sup>56</sup> a local form of creativity which is situated in what he calls "*the borderline zone of*  
45 *existing hegemonies...it becomes creative because it is measurable against normative*  
46 *hegemonic standards, because it creates understandable contrasts to such standards*"  
47 (page 106). It is also important to acknowledge that templates are still a relatively recent  
48 introduction to clinical practice and that although they appear to be embedded as part of  
49 normative practice, it is possible that some clinicians are still on a learning trajectory with  
50 regard to modifying their practices to incorporate these new technologies.  
51  
52  
53  
54  
55  
56  
57  
58  
59  
60

1  
2  
3 In the institutional account captured through the template, 'care' (specifically 'quality care' as  
4 currently incentivised in the Quality and Outcomes Framework) and patients with chronic  
5 diseases all start to look the same. Does this matter? One argument goes that as long as the  
6 interaction between clinician and patient facilitates the narrative, the particular, the complex  
7 and the ambiguous and this occurs within a therapeutic relationship which supports  
8 relational continuity, then it may not matter much. But close observation of actual practice  
9 suggests that, more often than not, nurses are constrained by the linear, instrumental logic  
10 of the template with its tendency to privilege biomedical, measurable concerns. The  
11 consultation can become a relatively bureaucratic transaction in which patients are shaped  
12 into an institutional framework<sup>55</sup> and meaningful involvement is difficult to sustain.<sup>23</sup> Both  
13 nurse and patient experience institutional constraints on what may be talked about and what  
14 the chronic disease review can 'be'. Practices become 'regimented'.<sup>57;58</sup>

### 22 **Strengths and limitations of this study**

23  
24  
25 A particular strength of this study rests with the sophisticated combination of qualitative  
26 ethnographic observation alongside video and screen capture, allowing us to open up the  
27 'black box' of the electronic patient record to detailed scrutiny.<sup>31</sup> What emerges is a  
28 conceptualisation of the electronic record as *integral* to the social processes of consultation,  
29 not simply a peripheral 'add-on' to the consultation. Our approach has enabled us to study  
30 the subtle complexities of interaction between humans and technologies, whilst retaining a  
31 broad appreciation of the institutions within which these interactions take place.<sup>59</sup> We have  
32 been able to build what anthropologists call a "thick description"<sup>60</sup> of the electronic patient  
33 record in its social context – combining detailed observational description with analysis and  
34 reflective interpretation. It has enabled us to explore working practices at a level of detail that  
35 more conventional qualitative methods (such as interviews or semi-structured  
36 questionnaires) cannot reach. For example, our focus has been on *actual* social practice  
37 rather than on participants' reports alone, and our enquiry has extended into the 'backstage'  
38 regions<sup>37</sup> of general practice as well as the consulting room. We have been able to highlight  
39 the profound influence of the template by drawing eclectically on a broad range of data  
40 sources, shifting constantly between 'zooming in' on the moment-by-moment detail of the  
41 consultation, and 'zooming out' to consider organisational practices (what Erickson has  
42 called the 'social microscope' and the 'social telescope').<sup>61</sup> This linguistic ethnographic  
43 approach offers great potential for the study of complex social practices in contemporary  
44 healthcare, including those which incorporate information technologies.

1  
2  
3 Our approach is time consuming and resource intensive, and our prioritisation of *depth* of  
4 analysis over breadth has meant that we have included only two general practices in this  
5 study and these may not be typical of all practices in how they approach either chronic  
6 disease management or the use of technologies. Furthermore, both practices used the same  
7 clinical system (EMIS-LV) and there may be important technical differences between  
8 systems. However as a principle we favoured what Stake has called 'opportunity to learn'  
9 over concerns about 'typicality'<sup>62</sup> and we hope that our work prompts new ways of thinking  
10 about the use of templates in chronic disease management. Templates are not unique to the  
11 EMIS-LV system, and we suspect that our findings may resonate with the experience of  
12 many clinicians who are using electronic checklists in the clinic. Although our methodological  
13 approach does not allow us to quantify the extent to which clinicians are able to combine a  
14 patient-centred approach whilst meeting the needs of the institution, we have been able to  
15 observe a range of practices which highlight the need to think more critically about what is  
16 being accomplished through the implementation and use of electronic templates in this  
17 context.  
18  
19  
20  
21  
22  
23  
24  
25

### 26 **Recommendations for policy and practice**

27  
28  
29 Although considerable care is invested in ensuring the diligent use of electronic templates in  
30 general practice, much less attention is paid to how these are actually used by clinicians, or  
31 to the possibility that incorporating a template might profoundly change the way in which  
32 care is 'enacted' by professionals, and experienced by patients.  
33  
34  
35  
36

37  
38 Ostensibly the data recording necessary for institutional processes such as the Quality and  
39 Outcomes Framework emerges effortlessly from regular clinical care, and serves to improve  
40 the quality of care. Our data show that paradoxically, the focus on what is measurable and  
41 recordable in templates, and designed to assure certain standards of 'quality' care (such as  
42 those identified in the QOF) can lead to a bureaucratisation of care and may serve to  
43 marginalise those aspects of 'quality' practice which lie beyond their focus, and which do not  
44 lend themselves to 'data capture'. These include – but are not limited to – the extent of the  
45 patient's opportunity to construct their narrative and the extent to which the clinician and  
46 patient are fully 'involved' in the interaction. Arguably these may well be aspects of care  
47 which mark out 'quality' care from 'minimum to be expected' care. Whilst incentivising  
48 clinicians may well result in better data quality it should not be assumed that the quality of  
49 care (in its most holistic sense) improves, although the care of the patient may be profoundly  
50 changed.  
51  
52  
53  
54  
55  
56  
57  
58  
59  
60



1  
2  
3 We suggest that in educating for chronic disease management, it is essential to incorporate  
4 greater recognition of the way in which clinicians integrate the electronic patient record and  
5 to regard this as an integral aspect of the consultation. The rational institutional logic  
6 inherent in the template does not align easily with the complexity of emergent dialogue  
7 between clinician and patient and it seems unlikely that minor adjustments to the design of  
8 template fields would address the communication challenges that we have identified in our  
9 research. However, it is essential that clinicians grasp fully the importance of the dialogue  
10 and learn ways of responding dynamically, creatively and individually to particular patients'  
11 concerns so that the patient's unique experience is not overshadowed by institutional imp-  
12 eratives. Although we have identified examples of these practices as 'exceptional' (page 15)  
13 it is in these exceptional practices that we suggest there is considerable scope for optimism  
14 in the face of increasing technologisation of care. The challenge for clinicians and educators  
15 is to appreciate that the incorporation of templates and other technologies renders the  
16 consultation *more complex* rather than *less complex*...and hence this is worthy of explicit  
17 educational attention. We would also urge a shift towards models of care delivery which  
18 embrace multimorbidity as the norm and which seek to embrace the complexity of this reality  
19 in primary care, while still allowing appropriate data capture to inform the evidence-based  
20 management of specific diseases.  
21  
22  
23  
24  
25  
26  
27  
28  
29  
30  
31  
32

### 33 ***Research ethics approval***

34  
35 Research ethics approval was granted by Thames Valley Multi-centre Research Ethics  
36 Committee (06/MRE12/81) in January 2007 and subsequent amendments.  
37  
38

### 39 ***Funding***

40  
41 This work was funded by a research grant from the UK Medical Research Council  
42 (Healthcare Electronic Records in Organisations, 07/133) and a National Institute for Health  
43 Research Doctoral Fellowship Award (RDA/03/07/076) for DS. Our funders were not  
44 involved in the selection or analysis of data, or in contributing to the content of the final  
45 manuscript.  
46  
47  
48

### 49 ***Data Sharing***

50  
51 No additional data available.  
52  
53  
54

### 55 ***Acknowledgement***

56  
57 We thank staff and patients in two UK general practices for their participation in this work.  
58  
59  
60

### ***Contributorship***

The paper is based on a PhD thesis written by DS and supervised by TG and CR. DS and TG conceptualised the HERO study. DS completed all data collection. All authors contributed to interpretation of the data. The paper was drafted by DS and revised with input from TG and CR. All authors approve the final version. DS is the guarantor for the paper.

For peer review only

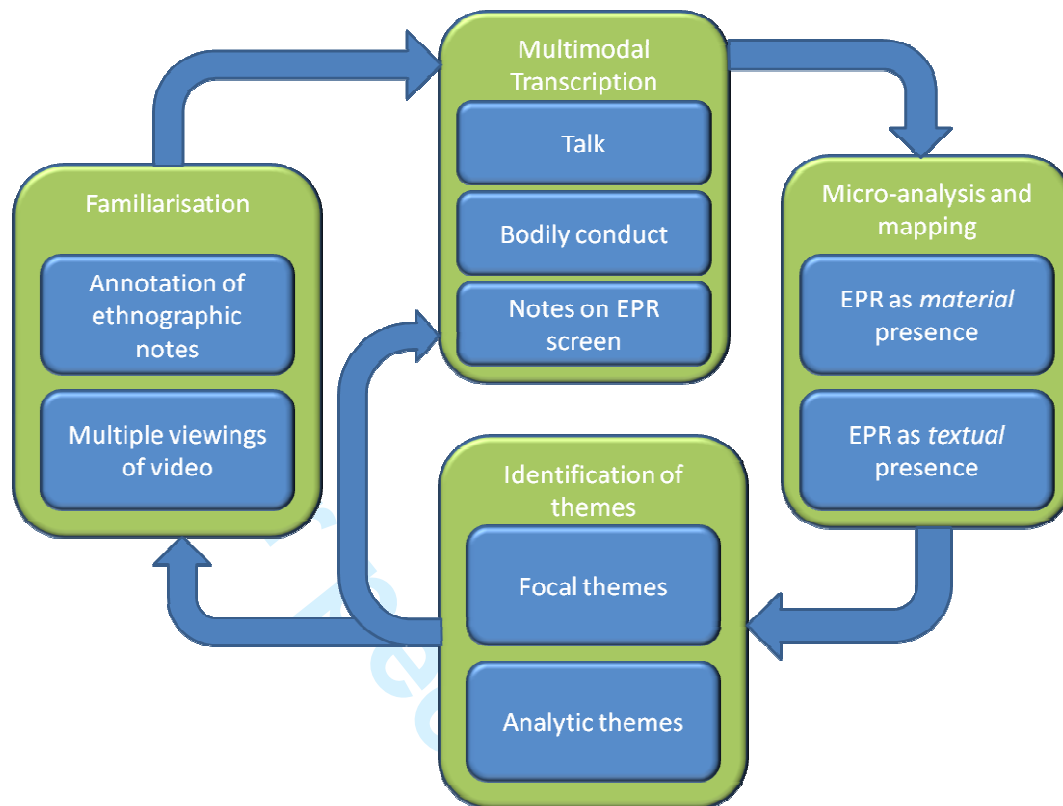

Figure 1. Approach to transcription and analysis

**Box 1. Framing the purpose of the chronic disease management clinic (ethnographic fieldnotes)**

A frail-looking 86 year old man struggled in to the clinic, barely able to walk. He was very deaf. He hung his walking stick over his chair and grimaced as he sat down, looking as if he was in pain. The nurse said loudly "We've called you in to look at you from the heart point of view. I know you have a lot of other things going on but we've called you in to look at your heart." She then asked "How often do you use the angina tablet under your tongue?" The patient replied in a way which made his most pressing concern clear: "Not much...for the simple reason that I can only crawl like a tortoise" Nurse: "and the simvastatin?" Patient: "no...I stopped that. I think it's giving me diarrhoea. These hearing aids are not very good you know. I've had it adjusted several times but I'm really disappointed. I had hoped for better than this"

**Box 2. Constructing patienthood in the asthma clinic (ethnographic fieldnotes)**

Sam, a lively 2-year-old came with his mum. He ran excitedly around the clinic room investigating every corner. His mum seemed exasperated and said she was not getting far with his treatment, a plastic “spacer” device to which the “pumps” were attached. The boy’s dad and grandparents were asthmatic, but Sam only saw his dad occasionally at weekends these days.

The nurse explained that the diagnosis of asthma cannot be certain in a 2-year-old. Things might be clearer by the time he was about 4. His mum was obviously relieved to know that it was not a definite thing. She was very anxious that her ex-partner wouldn’t know how to look after her son when he goes to visit. She asked “*There’s nothing I could have done to stop him getting it, is there?*” The nurse explained it was not her fault and did what she could to be reassuring. She explained what the different inhalers do...

The nurse pointed towards the computer, saying that she was going to make some notes. She completed the template line by line and there was no talking for several minutes. Sam ran towards the door and started rattling the door handle, but his mum said firmly “*NO...you’ve got to wait for the lady to finish her typing*”.

The nurse handed over a prescription and they left.

The EPR consisted of a collection of Read coded entries with some limited free text alongside:

*Never smoked tobacco*

*Inhaler technique moderate*

*Inhaler technique shown (needs to commence low dose ICS. I will monitor)*

*Symptoms occur at night (7/7)*

*Asthma limiting activities*

*Asthma management plan*

*Asthma compliance satisfactory (needs ICS)*

*Asthma daytime symptoms (consistent cough)*

*Asthma medication review*

*Asthma monitoring check done*

*Follow up asthma assessment (date)*

Table 1. Extract from consultation in diabetic clinic

| Time  | N/P | Words spoken /sounds                                                                                                    | Bodily conduct                                                               | Screen                                                                                                               |
|-------|-----|-------------------------------------------------------------------------------------------------------------------------|------------------------------------------------------------------------------|----------------------------------------------------------------------------------------------------------------------|
| 18.54 | N   | Does the diabetes get you<br>↑ <u>down</u> Mr C?                                                                        | N - > EPR; P looking down doing shoelaces<br>N < - > P                       | Diabetes template, with fields completed relating to foot examination. Cursor highlights field "Eye Clinic" (Y or N) |
|       |     | (1.0)                                                                                                                   | N < - > P. P puts hands on both knees.                                       |                                                                                                                      |
| 18.57 | P   | I get bored with life.                                                                                                  | P frowns                                                                     |                                                                                                                      |
| 18.58 | N   | Bo::red?<br>What bored with the f:ood o:r                                                                               | P turns head to gaze at adjacent chair. N - > P<br>P < - > N                 |                                                                                                                      |
|       |     | (1.2)                                                                                                                   |                                                                              |                                                                                                                      |
| 19.00 | P   | HA<br>HA HA                                                                                                             | P turns to adjacent chair and lifts jumper                                   |                                                                                                                      |
| 19.02 | P   | .hhh ah well °never mind°                                                                                               | P lifts jumper as turns toward N again                                       |                                                                                                                      |
|       |     | (0.2)                                                                                                                   |                                                                              |                                                                                                                      |
| 19.04 | P   | I<br>u::- used to be a <u>drinking</u> man                                                                              | P <-> N<br>P looks straight ahead. N remain looking at P                     |                                                                                                                      |
|       |     | (0.8)                                                                                                                   |                                                                              |                                                                                                                      |
| 19.06 | N   | [right                                                                                                                  |                                                                              |                                                                                                                      |
| 19.07 | P   | [And when I had to give up the beer I had to give up an <u>awful</u> lot of other things: (.) <u>surprising</u> really. | P holds jumper up in front of him and arranges it, looking at it as he talks |                                                                                                                      |
| 19.11 | N   | °<Yeah (.) yeah>°                                                                                                       | N - > P                                                                      |                                                                                                                      |
|       | P   | mm                                                                                                                      | P looks ahead, purses lips                                                   |                                                                                                                      |
| 19.13 | N   | So you have a <u>whiskey</u>                                                                                            | P turns to N                                                                 |                                                                                                                      |
|       |     | (0.8)                                                                                                                   |                                                                              |                                                                                                                      |
| 19.15 | P   | Yeah I have a whiskey at night                                                                                          | P < - > N                                                                    |                                                                                                                      |
| 19.16 | N   | °yeh°                                                                                                                   | N nods                                                                       |                                                                                                                      |
|       |     | (0.2)                                                                                                                   |                                                                              |                                                                                                                      |
| 19.17 | P   | Cos ↑ <u>whiskey</u> hasn't got much <u>sugar</u> in [surprising                                                        | P returns to rearranging jumper holding it up in front                       |                                                                                                                      |
|       | N   | [no:                                                                                                                    |                                                                              |                                                                                                                      |
|       | P   | its all been turned into alcohol a <u>good</u> whiskey maker so                                                         |                                                                              |                                                                                                                      |
|       |     | (0.8)                                                                                                                   | P still holding jumper in front turns to N                                   |                                                                                                                      |
| 19.23 | N   | And <u>beer</u> has quite a lot of carbohydrate doesn't it                                                              | N - > P , N nodding slightly                                                 |                                                                                                                      |
|       | P   | [yeah                                                                                                                   | P returns gaze to jumper, nodding                                            |                                                                                                                      |
|       |     | [when you think of the volume                                                                                           |                                                                              |                                                                                                                      |
|       |     | (0.6)                                                                                                                   | N turns gaze to her desk                                                     |                                                                                                                      |
| 19.27 | N   | °okay°                                                                                                                  | N gazing at desk, P arranging jumper                                         |                                                                                                                      |
|       |     | (1.6)                                                                                                                   |                                                                              |                                                                                                                      |
| 19.29 | N   | °All right then°                                                                                                        |                                                                              |                                                                                                                      |
|       |     | ((N typing for 12 seconds))                                                                                             | P looking ahead putting jumper over head. N rotates to face EPR              | Bypasses field "diet" Bypasses field "impotence" Next field is "depression screen" –enters 'Y'.                      |

Table 2. Setting up the frame for the asthma consultation

| Time  | N/P | Spoken word                                                                                                                                                           | Bodily conduct / notes on EPR                                                                              |
|-------|-----|-----------------------------------------------------------------------------------------------------------------------------------------------------------------------|------------------------------------------------------------------------------------------------------------|
| 01:08 | N   | So really straightforward.<br>(0.4)                                                                                                                                   | N puts paper on desk<br>N rotates body and gaze to face P, her hands on her lap.<br>P looking at N         |
| 01:09 | N   | Asthma assessment<br>(0.4)                                                                                                                                            |                                                                                                            |
|       | P   | Okay                                                                                                                                                                  | P nods                                                                                                     |
| 01:11 | N   | to see how your asthma's doing:                                                                                                                                       | N raises both hands in front                                                                               |
| 01:13 | N   | what you're doing w- with it when<br>it's good, what you do with it<br>when it's bad,<br>(0.2)<br>have you any problems with your<br>↑inhalers<br>(0.4) .hhh<br>(0.5) | N uses fingers to count (on "good", "bad", "problems")<br><br><br><br><br>N hands open out in front of her |
| 01:19 | N   | Very straightforward stuff                                                                                                                                            | N hands to lap                                                                                             |
|       | P   | Okay                                                                                                                                                                  | P nods                                                                                                     |
|       | N   | [all right?<br>.hhh                                                                                                                                                   |                                                                                                            |
| 01:21 | N   | U::hm                                                                                                                                                                 | N rotates body and gaze to EPR screen, hands on lap                                                        |
| 01:23 | N   | What I've got <u>here</u>                                                                                                                                             | N gestures her open hands towards the EPR screen (displaying<br>the patients "summary" screen)             |
| 01:24 | N   | Is that you're on:: (0.4) a purple<br>inhaler?                                                                                                                        | N rotates back towards P, bringing hands together                                                          |
| 01:26 | P   | (0.2)<br>Yeh (.)<br>uhm (0.2)<br>seretide.                                                                                                                            | P glances briefly towards the EPR screen                                                                   |

Table 3. Opening of asthma consultation

| Time  |   | Words spoken                                                                                                    | Bodily conduct / EPR screen                                                                                                                                                                                                                                                                 |
|-------|---|-----------------------------------------------------------------------------------------------------------------|---------------------------------------------------------------------------------------------------------------------------------------------------------------------------------------------------------------------------------------------------------------------------------------------|
| 00:57 | N | ..uh SO:<br>(0.6)<br>[ tell me<br>[C<br><br>(0.3)<br>what inhalers do you use (.)<br>an:d when do you use them. | N writing<br><br>Remains oriented to P as makes one keystroke to display prescriptions<br><br>N rotates her chair, pulling it back away from desk & re-orientating so that posture and gaze are towards P. She gestures towards his inhalers on the desk with her L hand on "what inhalers" |
|       |   | (0.4)                                                                                                           | N draws chair closer to P, still oriented towards him                                                                                                                                                                                                                                       |
| 1:02  | P | U::hm<br>(1.8)<br>Well say like if I get >sort<br>of< out of breath                                             | P rubs his nose<br>P puts his hand on inhaler, looking at N                                                                                                                                                                                                                                 |
|       |   | (0.4)                                                                                                           |                                                                                                                                                                                                                                                                                             |
| 1:07  | N | Uh uh                                                                                                           | N nods                                                                                                                                                                                                                                                                                      |
|       | P | then I'll take the brown one.                                                                                   | P points to brown inhaler on desk and looks at it                                                                                                                                                                                                                                           |
| 1:09  | N | Uh uh                                                                                                           | N nods, looking at P                                                                                                                                                                                                                                                                        |
|       |   | (1.2)                                                                                                           | Mutual gaze                                                                                                                                                                                                                                                                                 |
| 1:10  | P | but uhm                                                                                                         | P looks down at inhalers                                                                                                                                                                                                                                                                    |
|       |   | (2.7)                                                                                                           | P <-> N. P shrugs his shoulders                                                                                                                                                                                                                                                             |
| 1:14  | P | He [he                                                                                                          | P smiles, and slight laugh as looks at N                                                                                                                                                                                                                                                    |
|       | N | [he he he                                                                                                       | N joins P in smiling and a slight laugh. N shrugs her shoulders                                                                                                                                                                                                                             |
| 1:15  | P | I mean sometimes I'll use<br>the blue one.                                                                      | P lifts blue inhaler just off desk, looking at N                                                                                                                                                                                                                                            |
|       |   | (0.4)                                                                                                           |                                                                                                                                                                                                                                                                                             |
| 1:17  | N | Right                                                                                                           | N nods                                                                                                                                                                                                                                                                                      |

Table 4. Creative use of template

| Time                      | N/P | Words                                                                                                                                                                      | Bodily conduct                                                                                                                                                                                                  | Screen                                                                                                                                                                                                                                                               |
|---------------------------|-----|----------------------------------------------------------------------------------------------------------------------------------------------------------------------------|-----------------------------------------------------------------------------------------------------------------------------------------------------------------------------------------------------------------|----------------------------------------------------------------------------------------------------------------------------------------------------------------------------------------------------------------------------------------------------------------------|
| 10.37                     | N   | Let's pop it in the screen and see what we've got.                                                                                                                         | N pulls her chair in to the desk, gazing at screen. P ->EPR                                                                                                                                                     | Consultation screen                                                                                                                                                                                                                                                  |
| 10.39                     | N   | [A::dd<br>[C<br>(C)<br>[Templates<br>[C<br>(C)<br>[Respiratory<br>[C<br>(C)<br>[Asthma<br>[C<br>(C)                                                                        | N types keystrokes with her R hand holding PEFR meter in her L hand.<br>P looks at screen throughout                                                                                                            | Consultation screen. Entry 2 months earlier by receptionist – <i>Asthma check due</i> .<br>Navigates to “templates”<br>List of templates presented<br><br>Selects R – respiratory templates<br><br>There are 4 respiratory templates from which she selects A asthma |
| 10.43                     | N   | <u>So</u><br>Monitoring check [DONE<br>[C<br><br>[Now<br>[C<br>your height was a hundred and seventy one point fi:::::ve<br><br>.hhh look you've <u>grown</u> a centimetre | N looks down at piece of paper to L of her desk then types in his height into template<br><br>N gazes at screen and points to the screen sweeping finger across to show him the previous height on the template | First line in template “monitoring done” – she adds Y (yes). Hits return so today's date is entered. Then skips a line called “except report”<br>Field: O/E height,                                                                                                  |
| 10.49                     | P   | Have I<br>HE HE (laughs)<br>[C C]<br>(0.8)<br><br>[Doesn't show it<br>[C                                                                                                   | [return]                                                                                                                                                                                                        | Field: O/E weight, last recorded entry 16m ago                                                                                                                                                                                                                       |
|                           | N   | he he<br>(0.2)                                                                                                                                                             |                                                                                                                                                                                                                 | Field: smoking status (7 options). Last recorded entry “Never” 30m ago                                                                                                                                                                                               |
| (Transcript not shown)... |     |                                                                                                                                                                            |                                                                                                                                                                                                                 |                                                                                                                                                                                                                                                                      |
| 11.11                     | N   | O:kay<br>↑SO::<br>(1.0)                                                                                                                                                    | N looks down at paper on her desk, pointing at it with R hand                                                                                                                                                   | Field: Peak Flow Rate                                                                                                                                                                                                                                                |
| 11.14                     | N   | Five <u>thirty</u> was your best wasn't it                                                                                                                                 | N->EPR; P->EPR                                                                                                                                                                                                  |                                                                                                                                                                                                                                                                      |
|                           | N   | (( C C C C )) (3.7)                                                                                                                                                        | N -> keyboard as types.<br>P->EPR                                                                                                                                                                               | Enters 530, return displays today's date.<br>EPR calculates predicted PEFR as 600                                                                                                                                                                                    |
| 11:19                     | N   | So: your predicted is 600 >so it's a little bit< under but that's not <u>too</u> bad                                                                                       | N and P looking at screen                                                                                                                                                                                       |                                                                                                                                                                                                                                                                      |
| 11:24                     | N   | ↑was five thirty your best?<br>(1.8)                                                                                                                                       | N -> EPR; P-> EPR<br><br>N reaches for PEFR meter and looks at gauge. P -> N                                                                                                                                    |                                                                                                                                                                                                                                                                      |
| 11.27                     | P   | [°was it five eighty?°]                                                                                                                                                    | N tightens cap on PEFR, P looking at N                                                                                                                                                                          |                                                                                                                                                                                                                                                                      |
|                           | N   | [Just do it once more for me                                                                                                                                               |                                                                                                                                                                                                                 |                                                                                                                                                                                                                                                                      |
| 11:29                     | N   | DID YOU::?                                                                                                                                                                 | N passes PEFR to P who stands up as receives it                                                                                                                                                                 |                                                                                                                                                                                                                                                                      |



## Appendix

### Transcribing conventions, adapted from Atkinson and Heritage (1984)

|                                                                                     |                                                               |
|-------------------------------------------------------------------------------------|---------------------------------------------------------------|
| [ onset of overlapping speech                                                       | .hhh inbreath                                                 |
| ] end of spate of overlapping talk                                                  | Hhh outbreath                                                 |
| [[ speakers start a turn simultaneously                                             | = no pause between speakers; contiguous utterances            |
| : preceding sound is lengthened or drawn out<br>(more : means greater prolongation) | (( )) a non verbal activity (e.g. C = keystroke in this work) |
| <u>Underlining</u> emphasis                                                         | ( text ) unclear fragment of text                             |
| (.) pause of less than 0.2 seconds                                                  | . falling tone (not necessarily end of sentence)              |
| (0.4) pause, in tenths of a second                                                  | ? rising inflection (not necessarily a question)              |
| ↑↓ marked rising / falling intonation                                               | <b>CAPITALS</b> louder than surrounding talk                  |
| >text< the talk they surround is quicker than surrounding talk                      | <text> the talk they surround is slower than surrounding talk |
| °° the talk they surround is quieter than surrounding talk                          |                                                               |

## Reference List

- 1  
2  
3  
4  
5 (1) Wagner E, Austin B, Von Korff M. Organising care for patients with chronic illness. *Milbank Quarterly* 1996; 74(4):511-544.
- 6  
7  
8 (2) Ham C. The ten characteristics of the high-performing chronic care system. *Health*  
9 *Economics, Policy and Law* 2010; 5:71-90.
- 10  
11 (3) Greenhalgh T, Potts HWW, Wong G, Bark P, Swinglehurst D. Tensions and  
12 Paradoxes in Electronic Patient Record Research: A Systematic Literature Review  
13 Using the Meta-narrative Method. *The Milbank Quarterly* 2009; 87(4):729-788.
- 14  
15 (4) Black AD, Car J, Pagliari C, Anandan C, Cresswell K, Bokun T et al. The Impact of  
16 eHealth on the Quality & Safety of Health Care: A Systematic Overview. *PLoS Med*  
17 2011; 8(1):e1000387.
- 18  
19 (5) Monteiro E, Hepsø. Purity and Danger of an Information Infrastructure. *Systemic*  
20 *Practice and Action Research* 2002; 15(2):145-167.
- 21  
22 (6) Department of Health. Improving chronic disease management. Downloadable from  
23 [http://www.dh.gov.uk/prod\\_consum\\_dh/groups/dh\\_digitalassets/@dh/@en/document](http://www.dh.gov.uk/prod_consum_dh/groups/dh_digitalassets/@dh/@en/document/s/digitalasset/dh_4075213.pdf)  
24 [s/digitalasset/dh\\_4075213.pdf](http://www.dh.gov.uk/prod_consum_dh/groups/dh_digitalassets/@dh/@en/document/s/digitalasset/dh_4075213.pdf). 2004.
- 25  
26 (7) Singh D, Ham C. Improving care for people with long term conditions A review of  
27 UK and international management frameworks. Birmingham: NHS Institute for  
28 Innovation and Improvement; University of Birmingham; 2006.
- 29  
30 (8) Berg M. Implementing information systems in health care organizations: myths and  
31 challenges. *International Journal of Medical Informatics* 2001; 64:143-156.
- 32  
33 (9) General Practitioners Committee. Quality and Outcomes Framework. Guidance -  
34 Updated August 2004. Downloadable from  
35 [http://www.dh.gov.uk/prod\\_consum\\_dh/groups/dh\\_digitalassets/@dh/@en/document](http://www.dh.gov.uk/prod_consum_dh/groups/dh_digitalassets/@dh/@en/document/s/digitalasset/dh_4088693.pdf)  
36 [s/digitalasset/dh\\_4088693.pdf](http://www.dh.gov.uk/prod_consum_dh/groups/dh_digitalassets/@dh/@en/document/s/digitalasset/dh_4088693.pdf). 2009.
- 37  
38 (10) Nolte E, Knai C, McKee M. Managing chronic conditions: An introduction to the  
39 experience in eight countries. In: Nolte E, Knai C, McKee M, editors. Managing  
40 chronic conditions. European Observatory on Health Systems and Policies; 2008. 1-  
41 14.
- 42  
43 (11) Guthrie B, Saultz JW, Freeman GK, Haggerty L. Continuity of care matters. *BMJ*  
44 2008; 337:a867.
- 45  
46 (12) Roland M, Campbell S, Bailey N, Whalley D, Sibbald B. Financial incentives to  
47 improve the quality of primary care in the UK: predicting the consequences of  
48 change. *Primary Health Care Research and Development* 2006; 7:18-26.
- 49  
50 (13) Watt G. Blue sky research for primary care: A discussion paper. Downloadable from  
51 <http://www.sapc.ac.uk/images/documents/blue.pdf>. Society for Academic Primary  
52 Care; 2011.
- 53  
54  
55  
56  
57  
58  
59  
60

- 1  
2  
3 (14) Fortin M, Soubhi H, Hudon C, Bayliss E, van den Akker M. Multimorbidity's many  
4 challenges. *BMJ* 2007; 334.  
5  
6 (15) The NIHR School for Primary Care Research. See:  
7 [http://www.nihr.ac.uk/research/Pages/programmes\\_primary\\_care\\_research.aspx](http://www.nihr.ac.uk/research/Pages/programmes_primary_care_research.aspx).  
8 2012.  
9  
10 (16) Rhodes P, Langdon M, Rowley E, Wright J, Small N. What Does the Use of a  
11 Computerized Checklist Mean for Patient-Centred Care? The Example of a Routine  
12 Diabetes Review. *Qualitative Health Research* 2006; 16(3):353-376.  
13  
14 (17) McDonald R, Harrison S, Checkland K, Campbell S, Roland M. Impact of financial  
15 incentives on clinical autonomy and internal motivation in primary care: ethnographic  
16 study. *BMJ* 2007; 39239.890810.BE.  
17  
18 (18) Checkland K, McDonald R, Harrison S. Ticking Boxes and Changing the Social  
19 World: Data Collection and the New UK General Practice Contract. *Social Policy &*  
20 *Administration* 2007; 41(7):693-710.  
21  
22 (19) Edgar A. The expert patient: Illness as practice. *Medicine, Health Care and*  
23 *Philosophy* 2005; 8:165-171.  
24  
25 (20) Frank A. *The Wounded Storyteller: Body, Illness, and Ethics*. Chicago: University of  
26 Chicago Press; 1995.  
27  
28 (21) Kleinmann A. *The illness narratives: suffering, healing and the human condition*. New  
29 York: Basic Books; 1988.  
30  
31 (22) Strauss AL. *Chronic illness and the quality of life*. St. Louis: Mosby; 1975.  
32  
33 (23) Goffman E. *Involvement. Behavior in Public Places*. New York: The Free Press;  
34 1966. 33-42.  
35  
36 (24) Berger J, Mohr J. *A Fortunate Man; the Story of a Country Doctor*. The Penguin  
37 Press; 1967.  
38  
39 (25) Heath I. *The Mystery of General Practice*. Nuffield Provincial Hospitals Trust,  
40 London; 1995.  
41  
42 (26) Charon R. Narrative Medicine: Form, Function, and Ethics. *Annals of Internal*  
43 *Medicine* 2001; 134(1):83-87.  
44  
45 (27) Greenhalgh T, Hurwitz B. Why study narrative? *BMJ* 1999; 318:48-50.  
46  
47 (28) Balint M. *The Doctor, His Patient and the Illness*. 2nd ed. Edinburgh: Churchill  
48 Livingstone; 1964.  
49  
50 (29) Heeks R, Mundy D, Salazar A. *Why Health Care Information Systems Succeed or*  
51 *Fail*. University of Manchester: Institute for Development Policy and Management;  
52 1999.  
53  
54  
55  
56  
57  
58  
59  
60

- 1  
2  
3 (30) Berg M. Health care work and patient care information systems. *Health Information*  
4 *Management - integrating information technology in health care work*. 2004. 45-64.  
5  
6 (31) Swinglehurst D, Roberts C, Greenhalgh T. Opening up the "black box" of the  
7 electronic patient record: A linguistic ethnographic study in general practice.  
8 *Communication and Medicine* 2011; 8(1):3-15.  
9  
10 (32) Berg M. Of Forms, Containers, and the Electronic Medical Record: Some Tools for a  
11 *Sociology of the Formal*. *Science, Technology & Human Values* 1997; 22(4):403-433.  
12  
13 (33) Berg M. Practices of reading and writing: the constitutive role of the patient record in  
14 medical work. *Sociology of Health and Illness* 1996; 18(4):499-524.  
15  
16 (34) Timmermans S, Berg M. The gold standard: The challenge of evidence-based  
17 medicine and standardization in health care. Philadelphia: Temple University Press;  
18 2003.  
19  
20 (35) Harré R. Material Objects in Social Worlds. *Theory Culture Society* 2002; 19(5-6):23-  
21 33.  
22  
23 (36) Swinglehurst D, Greenhalgh T, Myall M, Russell J. Ethnographic study of ICT-  
24 supported collaborative work routines in general practice. *BMC Health Serv Res*  
25 2010; 10:348.  
26  
27 (37) Goffman E. *Regions and Region Behaviour. The Presentation of Self in Everyday*  
28 *Life*. London: Penguin Books; 1959. 109-140.  
29  
30 (38) Green J, Thorogood N. *Qualitative Methods for Health Research*. London, California,  
31 New Delhi: SAGE Publications Ltd; 2004.  
32  
33 (39) Rampton B, Tusting K, Maybin J, Barwell R, Creese A, Lytra V. UK Linguistic  
34 Ethnography: A discussion paper. Downloadable from [http://www.ling-](http://www.ling-ethnog.org.uk/documents/papers/ramptonetal2004.pdf)  
35 [ethnog.org.uk/documents/papers/ramptonetal2004.pdf](http://www.ling-ethnog.org.uk/documents/papers/ramptonetal2004.pdf). 2004.  
36  
37 (40) Roberts C, Sarangi S. Theme-oriented discourse analysis of medical encounters.  
38 *Medical Education* 2005; 39:632-640.  
39  
40 (41) Atkinson JM, Heritage J. Transcript notation. In: Atkinson JM, Heritage J, editors.  
41 *Structures of Social Action: Studies in Conversation Analysis*. Cambridge: Cambridge  
42 University Press; 1984. ix-xvi.  
43  
44 (42) Jewitt C. *Towards a multimodal analysis. Technology, literacy and learning: a*  
45 *multimodal approach*. Abingdon: Routledge; 2006. 32-52.  
46  
47 (43) Goodwin C. Professional Vision. *American Anthropologist* 1994; 96(3):606-633.  
48  
49 (44) Blommaert J. Sociolinguistic scales. Working Papers in Urban Language &  
50 Literacies, Paper 37. Institute of Education; 2006.  
51  
52 (45) Sarangi S, Slembrouck S. The pragmatics of information exchange in bureaucratic  
53 discourse. In: Sarangi S, Slembrouck S, editors. *Language, Bureaucracy & Social*  
54 *Control*. Harlow: Addison Wesley Longman Limited; 1996. 17-35.  
55  
56  
57  
58  
59  
60

- 1  
2  
3 (46) Roberts C, Sarangi S, Southgate L, Wakeford R, Wass V, May C. Oral examinations -  
4 equal opportunities, ethnicity, and fairness in the MRCGP. *BMJ* 2000; 320:370.  
5  
6 (47) Wagner E, Austin B, Von Korff M. Organising care for patients with chronic illness.  
7 *Milbank Quarterly* 1996; 74(4):511-544.  
8  
9 (48) May C, Rapley T, Moreira T, Finch T, Heaven B. Technogovernance: Evidence,  
10 subjectivity, and the clinical encounter in primary care medicine. *Social Science &*  
11 *Medicine* 2006; 62:1022-1030.  
12  
13 (49) Department of Health. Liberating the Talents: Helping primary care trusts and nurses  
14 to deliver the NHS Plan. Downloadable from  
15 [http://www.dh.gov.uk/en/Publicationsandstatistics/Publications/PublicationsPolicyAnd](http://www.dh.gov.uk/en/Publicationsandstatistics/Publications/PublicationsPolicyAndGuidance/DH_4007473)  
16 [Guidance/DH\\_4007473](http://www.dh.gov.uk/en/Publicationsandstatistics/Publications/PublicationsPolicyAndGuidance/DH_4007473). 2002.  
17  
18 (50) Charles-Jones H, Latimer J, May C. Transforming general practice: the redistribution  
19 of medical work in primary care. *Sociology of Health and Illness* 2003; 25(1):71-92.  
20  
21 (51) Bourdieu P. Outline of a Theory of Practice. Cambridge: Polity; 1977.  
22  
23 (52) Bourdieu P. The Logic of Practice. Cambridge: Polity; 1990.  
24  
25 (53) Goffman E. Involvement. Behavior in Public Places. New York: The Free Press;  
26 1966. 33-42.  
27  
28 (54) Roberts C, Campbell S. Fitting stories into boxes: rhetorical and textual constraints on  
29 candidates' performances in British job interviews. *Journal of Applied Linguistics*  
30 2005; 2(1):45-73.  
31  
32 (55) Douglas M. Institutions Do the Classifying. How Institutions Think. New York:  
33 Syracuse University Press; 1986. 91-109.  
34  
35 (56) Blommaert J. Choice and Determination. Discourse: Key topics in sociolinguistics.  
36 Cambridge: Cambridge University Press; 2005. 98-124.  
37  
38 (57) Blommaert J. Discourse. Cambridge: Cambridge University Press; 2005.  
39  
40 (58) Blommaert J, Collins J, Slembrouck S. Polycentricity and interactional regimes in  
41 "global neighbourhoods". *Ethnography* 2005; 6(2):205-235.  
42  
43 (59) Greenhalgh T, Swinglehurst D. Studying technology use as social practice: the  
44 untapped potential of ethnography. *BMC Medicine* 2011; 9:45.  
45  
46 (60) Geertz C. Thick Description: Toward an Interpretive Theory of Culture. The  
47 Interpretation of Cultures. New York: Basic Books; 1973. 3-30.  
48  
49 (61) Erickson F. Talk and Social Theory. Cambridge: Polity; 2004.  
50  
51 (62) Stake RE. Qualitative Case Studies. In: Denzin NK, Lincoln YS, editors. The Sage  
52 Handbook of Qualitative Research. 3rd ed. Sage Publications, Inc; 2005. 443-466.  
53  
54  
55  
56  
57  
58  
59  
60

Original paper submitted to BMJ Open June 2012

## Computer templates in chronic disease management: ethnographic case study in general practice

Deborah Swinglehurst\* (corresponding author)  
NIHR Academic Clinical Lecturer

Trisha Greenhalgh\*  
Professor of Primary Health Care

Celia Roberts\*\*  
Professor of Applied Linguistics

\*Centre for Primary Care and Public Health, Queen Mary, University of London, 58 Turner Street, London E1 2AB

\*\* Department of Education and Professional Studies, King's College London, Franklin Wilkins Annexe, Waterloo Road, London SE1 9NN

Corresponding author: Deborah Swinglehurst  
Correspondence address:  
p: as above  
t: +44 20 7882 7204  
f: +44 20 7882 2552  
e: [d.swinglehurst@qmul.ac.uk](mailto:d.swinglehurst@qmul.ac.uk)

All authors have completed the Unified Competing Interest form at [http://www.icmje.org/coi\\_disclosure.pdf](http://www.icmje.org/coi_disclosure.pdf) (available on request from the corresponding author) and declare: no support from any organisation for the submitted work [or describe if any]; no financial relationships with any organisations that might have an interest in the submitted work in the previous three years [or describe if any], no other relationships or activities that could appear to have influenced the submitted work.

The Corresponding Author has the right to grant on behalf of all authors and does grant on behalf of all authors, an exclusive licence (or non exclusive for government employees) on a worldwide basis to the BMJ Publishing Group Ltd to permit this article (if accepted) to be published in BMJ editions and any other BMJ PGL products and sublicences such use and exploit all subsidiary rights, as set out in our licence

## Abstract

### Objective

To investigate how electronic templates shape, enable and constrain consultations about chronic disease.

### Design

Ethnographic case study, combining fieldnotes, video-recording, screen capture with micro-analysis of talk, body language and data entry – an approach called linguistic ethnography.

### Setting

Two general practices in England.

### Participants and methods

Ethnographic observation of administrative areas and 36 nurse-led consultations. 24 consultations directly observed; 12 consultations video-recorded, alongside computer screen capture. Consultations transcribed using conversation analysis conventions, with notes on body language and the electronic record. Analysis involved repeated rounds of viewing video, annotating fieldnotes, transcription, and micro-analysis, to identify themes. Data interpreted using discourse analysis, with attention to socio-technical theory.

### Results

Consultations centred explicitly or implicitly on evidence-based protocols inscribed in templates. Templates did not simply identify tasks for completion, but contributed to defining what chronic diseases were, how care was delivered and what it meant to be a patient or professional in this context. Patients' stories morphed into data bytes; the particular became generalised; the complex was made discrete, simple and manageable; and uncertainty became categorised and contained. Many consultations resembled bureaucratic encounters, primarily oriented to completing data fields. We identified a tension, sharpened by the template, between different framings of the patient – as 'individual' or as 'one of a population'. Some clinicians overcame this tension, responding creatively to prompts within a dialogue constructed around the patient's narrative.

### Conclusions

Despite their widespread implementation, little previous research has examined how templates are actually used in practice. Templates do not simply document the tasks of

1  
2  
3  
4  
5  
6  
7  
8  
9  
10  
11  
12  
13  
14  
15  
16  
17  
18  
19  
20  
21  
22  
23  
24  
25  
26  
27  
28  
29  
30  
31  
32  
33  
34  
35  
36  
37  
38  
39  
40  
41  
42  
43  
44  
45  
46  
47  
48  
49  
50  
51  
52  
53  
54  
55  
56  
57  
58  
59  
60

chronic disease management but profoundly change the nature of this work. Designed to assure standards of 'quality' care they contribute to bureaucratisation of care and may marginalise aspects of quality care which lie beyond their focus. Creative work is required to avoid privileging 'institution-centred' care over patient-centred care.

For peer review only



## Summary

### **Article Focus**

- How do computer templates for chronic disease management shape, enable and constrain clinical consultations?
- How does the tension between different ways of framing the patient (patient as 'individual'; patient as 'one of a population') play out as clinicians use templates to support chronic disease management and meet institutional targets?

### **Key Messages**

- Electronic templates introduced to assure quality of care in chronic disease management may privilege the needs of the institution for data over the particular needs of individual patients
- Some but not all clinicians sustain a patient-centred approach through creative and flexible use of the template, while maintaining attention to the patient's narrative
- Linguistic ethnography offers potential for studying complex socio-technical practices in healthcare

### **Strengths and limitations of this study**

- Explores the *actual* social practices of working with templates at a level of detail which more conventional qualitative methods (e.g. interviews) cannot reach
- Adopts a novel methodological approach embracing the complexities of interaction between humans and technologies, whilst retaining a broad appreciation of institutional context
- Prompts new ways of conceptualising what is accomplished when templates are used
- We prioritised depth of analysis over breadth. ~~However, the~~ two general practices we studied may not be typical of all practices in how they approach chronic disease management or technology use.

## Introduction

The electronic patient record underpins one of the cornerstones of chronic disease management, the “three Rs” of registration, recall and regular review.<sup>1</sup> Information technology is seen as key to a high-performing chronic care system.<sup>2</sup> It facilitates effective population management (e.g. disease registration and population risk stratification), supports communication between professionals, and provides data to inform the continuous quality improvement cycle.<sup>2</sup> Over 2000 primary studies, mostly randomised trials, have measured the impact of the electronic record on different aspects of care<sup>3</sup> but many had methodological flaws and questions remain about the circumstances in which the benefits of these technologies outweigh their limitations.<sup>4</sup> Nevertheless it is widely assumed that electronic records and related technologies will result in better care for patients and efficiency savings for clinicians.<sup>5</sup>

In many chronic diseases, clinical trials and cohort studies have produced robust evidence-based guidance on what works – and what may happen if particular conditions or risk factors go untreated.<sup>6</sup> In the UK, best practice in prevention, surveillance and therapy is summarised in patient pathways, guidelines and decision support algorithms which are routinely available on the clinician’s desktop computer as pull-down menus, pop-up prompts and templates (electronic forms).<sup>7</sup> These tools support structured management of individual patients (‘primary use’ of data) and also produce aggregated data on costs and/or organisational performance (‘secondary use’).<sup>8</sup> The latter may be linked to incentives, for example the UK Quality and Outcomes Framework (QOF).<sup>9</sup>

In the UK, six out of ten adults report having an incurable long-term condition; it is not unusual for an 80-year old to have five or six such conditions.<sup>7,10</sup> Concerns are emerging about fragmentation of care,<sup>11,12</sup> and the dangers of the ‘vertical’ disease-specific focus implied in translational research and in clinical guidelines.<sup>13</sup> What constitutes ‘best care’ for patients with multimorbidity is poorly understood<sup>14</sup> and has been identified as a priority area for further research.<sup>15</sup>

It is often said that “chronic diseases require a complex response”<sup>10</sup> and that structured care, for example by using checklists or templates, is a mark of quality in chronic disease management. Templates have also been identified as a way of streamlining consultations and establishing routines.<sup>16</sup> Templates are formal tools which enable care to be undertaken systematically and which open up scope for manipulating, aggregating, transporting and sharing data. Although structured care and attempts to standardise clinical terminology pre-

Field Code Changed

dated the introduction of electronic records, these technologies introduce new possibilities for such care. For example, a quick search can identify not only the proportion of diabetic patients with an HbA1c below an institutionally defined target, but also which *particular* individuals have been given smoking advice (or not) within a defined time period (or at least the extent to which such activity has been documented). 'Off target' individuals can be identified quickly and in an automated way, triggering responses designed to 'chase' patients, and constructing a new category of 'patient' defined by the practice's procedures – that is, someone whose data fields are incomplete or whose values are out of range.<sup>17;18</sup>

Field Code Changed

From the patient's perspective, chronic illness is a unique personal experience which may involve pain, disability, loss of status, reduced income and a heroic struggle to retain dignity, rebuild identity and live a moral life in the face of adversity.<sup>19-22</sup> The consultation is an opportunity for the patient to tell their story to an involved listener<sup>23</sup> – who in turn shapes the telling and is witness to their suffering.<sup>24;25</sup> Constructing a narrative in the context of an ongoing therapeutic relationship is one way in which a patient makes sense of their illness.<sup>26;27</sup> Conceptualised this way, the consultation focuses on a patient's specific, particular experience – the 'here and now'. As Balint emphasised, continuity of care in the general practice relationship provides repeated opportunities for recounting the illness narrative, helping to build the therapeutic relationship.<sup>28</sup>

Field Code Changed

The rationalisation of chronic disease management, guided by a limited set of coded entries on the electronic record exposes what some authors have termed a rationality-reality gap<sup>29</sup> or fatal paradox<sup>30</sup> between the inherently messy and unique nature of healthcare work and the standardisation of this work. Central to this paradox is a tension between different ways of framing the patient – the patient as an individual whose illness narrative is unique, and the patient as one of a population, all of whom need standardised management of the 'same' disease.<sup>31</sup>

Field Code Changed

Field Code Changed

Field Code Changed

In this study, we sought to address two questions. First, how do computer templates for chronic disease management shape, enable and constrain clinical consultations? Second, how does the tension between different ways of framing the patient (patient as 'individual'; patient as 'one of a population') play out as clinicians draw on these templates to support such consultations and meet institutional targets? We adopted a socio-technical approach, meaning we focussed on the dynamic, contingent interaction between humans and technologies rather than assuming ~~technologies-technology is itself~~ 'causal' of specific effects.<sup>32-34</sup> From this perspective the electronic record is not simply a collection of hardware and software on the clinician's desk but is a complex "social substance" definable

Field Code Changed

1  
2  
3  
4  
5  
6  
7 in terms of the properties of a social world.<sup>35</sup> The template is itself a manifestation of  
8 complex socio-technical practices and relationships involving systems engineers, clinical  
9 software designers and others, whose assumptions about chronic disease management  
10 practices become inscribed (and reified) in the template. In this study we sought to illuminate  
11 how and to what extent templates – and the socio-technical practices of which they are a  
12 part – contribute to what is accomplished in the clinic.  
13  
14

Formatted: Do not check spelling or grammar, Superscript

Field Code Changed

## 15 16 17 18 **Methods**

19  
20 The study was part of the Healthcare Electronic Records in Organisations (HERO) study,  
21 funded by the UK Medical Research Council under a 'new methodologies' call which  
22 highlighted the limitations of experimental studies for certain research questions. Details of  
23 governance and ethical approval for the study have been published<sup>36,36</sup> and the methods  
24 used in this part of the HERO study have been described in detail elsewhere and  
25 summarised briefly here<sup>31</sup>  
26  
27

Field Code Changed

Field Code Changed

28  
29 DS (a general practitioner) conducted 8 months (187 hours) of ethnographic observation in  
30 two UK general practices, in clinical and administrative areas. The practices served mixed  
31 populations of approximately 11800 and 12600 patients respectively, both used the EMIS-LV  
32 clinical system (the most widely used system in the UK) and both practices scored highly in  
33 the Quality and Outcomes Framework.  
34  
35

36  
37 Observations began in what the sociologist Erving Goffman<sup>37,36</sup> called the 'backstage'  
38 regions of practice (that is, areas which are not usually 'patient facing' e.g. administrative  
39 offices), shadowing individuals as they worked. The researcher made detailed fieldnotes and  
40 elicited narratives from staff, seeking to identify "What is being accomplished here?"  
41 Documents (e.g. recall letters, patient leaflets) relevant to chronic disease management  
42 were collected. This naturalistic approach seeks to generate in-depth knowledge about how  
43 and why people behave as they do in particular settings, whilst minimising the impact of the  
44 researcher.<sup>38,37</sup> Observation then moved to the 'front stage' – that is, the main focus of  
45 clinician-patient communication – the clinical consultation.<sup>37,36</sup> 24 chronic disease  
46 management consultations were observed, then 12 were video-recorded, with parallel  
47 screen capture of the computer display. The two video streams were merged and  
48 synchronised using video editing software (Adobe® Premier Elements 4) allowing us to  
49 observe the 'electronic record-in-use'. Recording began when the record was accessed  
50 (often several minutes before the patient entered the room).  
51  
52  
53  
54  
55

Field Code Changed

Field Code Changed

Field Code Changed

Our work is a contribution to an emerging field called 'linguistic ethnography' bringing together a focus on language – in this case a microanalysis of the unfolding consultation – with ethnographic appreciation of the wider institutional context.<sup>3938</sup> It is underpinned by a social constructionist perspective, that is to say language (which incorporates actions as well as words) does not just reflect or express intentions or decisions (the *representational* role of language) but *makes* them (the *constitutive* role of language) – talk *is* work.<sup>4039</sup> Our frame of reference is interpretivist; we seek to explore the meaning-making of our research participants as they engage in the actual practices of chronic disease management.

Our iterative approach to data transcription, annotation and analysis is shown in Figure 1. Fieldnotes were annotated, and videos viewed multiple times. Transcription incorporated Jefferson conventions for the spoken word (as in conversation analysis – see Appendix),<sup>4140</sup> to which we added a simple horizontal arrow (→ or ↔) to indicate direction of gaze, notes on bodily conduct, and notes on the electronic record, using time as an anchor.<sup>4241</sup> We mapped consultations and conducted a detailed micro-analysis of the moment-by-moment unfolding of the interactions. This included paying attention to the *material* features of the EPR (e.g. screen, keyboard) and the *textual* features (displayed medical information, prompts, alerts, fields for completion). We identified *focal* themes relevant to the professional domain (such as agenda setting) and *analytic* themes (from linguistics and sociology) such as Goffman's notion of 'involvement'<sup>4039</sup> Goffman defines involvement as sustaining "*cognitive and affective engrossment*" in an activity, or the "*mobilization of one's psychobiological resources*" (page 36).<sup>23</sup>

[FIGURE 1 ABOUT HERE]

## Results

The dataset comprised over 400 pages of ethnographic fieldnotes (of which around 15% related directly to chronic disease management) and 12 video-recordings with screen capture (of a total of 54 recordings incorporating all aspects of general practice). Below, we illustrate our findings with selected data extracts and accompanying analysis, drawn from a variety of sources including ethnographic fieldnotes, transcripts and practice documents.

### The electronic record shapes how disease is defined

In both practices, chronic disease management was organised so that each of a patient's chronic diseases resulted in a different occasion for care, often with a different nurse using a

1  
2  
3  
4  
5  
6  
7 different template. This arrangement assumed that patients (and nurses) could distinguish  
8 features of one chronic disease from another in the face of multiple morbidities. A common  
9 way for the nurse to frame the purpose and scope of the consultation was to use statements  
10 such as “*how have things been from the diabetes point of view?*”, or more simply  
11 “*so...asthma review*”. To use Goodwin’s terminology, these questions do the work of  
12 establishing what is ‘figure’ (relevant, salient) and what is ‘ground’ (less relevant to the  
13 enquiry).<sup>4342</sup> ~~Only-Occasionally~~ ~~was~~ this separation of the patient into different chronic  
14 diseases was identified as potentially problematic. An example is shown in Box 1.

Field Code Changed

15  
16  
17  
18 [INSERT BOX 1 ABOUT HERE]

19  
20 The nurse’s statement (Box 1) “*I know you have a lot of other things going on but we’ve*  
21 *called you in to look at your heart*” performs two contrasting functions. On the one hand she  
22 acknowledges the difficulty inherent in separating out his ‘heart’ problem from his other  
23 illnesses and wider experience, making it legitimate for the patient to frame his heart  
24 problems in a broader context. However, in the next part of her utterance “*but we’ve called*  
25 *you in to look at your heart*” she exhibits what discourse analysts call a ‘scale jump’,<sup>4443</sup> She  
26 shifts quickly from an individual, unique ‘here and now’ framing (“*I know you have...*”) to a  
27 more general institutional framing (“*we’ve called you in...*”). This shift indexes what is most  
28 relevant and implies certain limits around what may happen in this consultation.

Field Code Changed

29  
30 The patient responds by juxtaposing his prime concerns with the ‘core’ concerns of this  
31 clinic. First, he rarely uses his angina tablet – but only because his mobility problems  
32 outweigh his angina. Then his concern about simvastatin moves swiftly into a complaint  
33 about his hearing aids. Neither mobility nor deafness are pursued by the nurse (or recorded  
34 on the electronic record); they are ‘unremarkable’ problems in this (heart) clinic. It is not  
35 simply that these concerns remain unexplored *because* there is no field dedicated to them in  
36 the template. More subtly, the practice of using a template shapes how disease and illness  
37 experience are made sense of in this environment.

38  
39 The template is not merely organised around a single disease entity, but around a particular  
40 version of this disease, reflecting the assumptions of those responsible for designing the  
41 template. For example, diabetes in all its complexity is rationalised in terms of a series of  
42 codes e.g. weight, units of alcohol, blood pressure, lower limb pulses (present or absent) –  
43 with minimal (if any) supporting free text. The primacy of the ‘measurable’ was often made  
44 explicit in the consultation. For example, three minutes into a diabetes consultation, one  
45 nurse faced the computer screen as she announced “*CAN WE DO a few measurements*”

1  
2  
3  
4  
5  
6  
7 today then just to see (0.2) uhm where everything is". Here, not only are "measurements"  
8 equated with what is to be recorded on the electronic record, but it is implied that they will  
9 reveal "everything". Another nurse – in an asthma clinic – remarked (as a patient moved to  
10 leave) "Hang on a minute. I need to pop these in here (turning to computer)...this is a whole  
11 set of measurements which tells us where your lungs are now".  
12

13  
14 Nurses frequently engaged in the kind of activities which characterise bureaucratic  
15 encounters.<sup>4544</sup> For example, deviations from the institutional agenda were brief; patients'  
16 talk was interpreted in direct relation to the template (an example of an institutional script, or  
17 a particular way of accounting for practices);<sup>4546</sup> and talk was steered in particular  
18 institutionally-relevant directions. For example, in Table 1, from a diabetic clinic, the nurse  
19 anticipates an upcoming field in the template ('Depression Screening'). At the time, the  
20 Quality and Outcomes Framework required case finding for depression amongst diabetic  
21 patients, using two standard questions (*During the last month have you often been bothered*  
22 *by feeling down, depressed or hopeless? During the last month, have you often been*  
23 *bothered by having little interest or pleasure in doing things?)* Although we observed no  
24 examples of this precise wording being used, nurses often incorporated their own versions,  
25 enquiring about the 'mood' or feeling 'down'. The transcript in Table 1 shows the nurse's  
26 handling of these questions. In this extract she refers back to a brief account of whiskey  
27 drinking, which the patient had offered about seven minutes earlier:  
28  
29

30 Patient: "well I look a- I look after myself I drink whiskey to counteract the cigarettes y'know"  
31

32 Nurse: "do you [laugh] a whiskey a day?"  
33

34 Patient: "yeh"  
35  
36  
37  
38  
39

40 [INSERT TABLE 1 ABOUT HERE]  
41

42 In Table 1, the question "Does the diabetes get you down Mr C?" is met by a relatively long  
43 pause (in conversational terms). The patient frowns and says he gets "bored with life"  
44 widening the perspective towards his broader life experience. The nurse responds with a  
45 question which invites elaboration, but simultaneously refocuses on a narrow diabetes-  
46 relevant cause (*the food*). This is an awkward moment and prompts the patient to withdraw  
47 his gaze, laugh ironically, lift his jumper and say, quietly "ah well °never mind°" –  
48 communicating disappointment. A brief but poignant narrative unfolds, painting a picture of a  
49 man who has reluctantly made lifestyle changes, restricting his enjoyment of life. Being a  
50 "drinking man" was part of his (male) identity and conjures up a social life around alcohol  
51 ("when I had to give up the beer I had to give up an awful lot of other things:"). At 19.11 the  
52  
53  
54  
55

56 10  
57  
58  
59  
60

Field Code Changed

Field Code Changed

Formatted: Do not check spelling or grammar, Superscript

1  
2  
3  
4  
5  
6  
7 nurse slows and quietens her speech, perhaps encouraging elaboration, but the narrow  
8 biomedical focus of the template items is restored from 19.13 onwards, the patient justifying  
9 his whiskey by reference to its minimal 'sugar' content, which the nurse re-contextualises  
10 into even more 'scientific' terms – 'carbohydrates' and 'volumes'.  
11

12  
13 After the patient leaves, the nurse corrects the 'alcohol' record she had entered earlier. She  
14 replaces "14U" (copied from the previous year's entry in the template) with "7U". "A whiskey  
15 a day?" becomes 'one unit', in what is an uncritical shift from an *unquantified* volume of  
16 whiskey to an (apparently) *quantified* one. The complex interactions between the patient's  
17 diabetes, his identity as a "*drinking man*", his losses and his "*boredom with life*" are reduced  
18 to an institutional account which reads simply (and potentially misleadingly): "Depression  
19 screen – 'Y'; Alcohol – 7 units". The construction of particular versions of diabetes  
20 contributes to constructions of particular kinds of patient, discussed further below.  
21  
22  
23

#### 24 25 **The electronic record shapes how care is delivered**

26 The electronic record shapes care delivery in several ways. It is often the prompt to care,  
27 defined by 'overdue diary entries', overdue 'medication review' dates, and audits by a tool  
28 called 'Population Manager' identifying patients with missing QOF data ("*we've called you in*"  
29 – Box 1). Patients attend regularly, or may sign disclaimers, in a process which is institution-  
30 led, rather than patient-initiated. For example, in one practice letters of invitation to the  
31 'cardiovascular check up' were signed off by '*Practice Administration*' (not a clinician) and  
32 couched in institutional terms ("*We are now regularly reviewing all patients who have angina*  
33 *or who have had a heart attack. As a result of this we would like you to attend a health*  
34 *check...[further [appointment](#) details]. There is no need to be concerned about this*  
35 *appointment we are just striving to maintain the standards of care we provide for you.*") The  
36 potential benefit to the patient is implicit and abstract rather than explicit and specific. For  
37 example, the justification for the check is presented only in terms of '*maintaining the*  
38 *standards*' or '*regular*' procedure. Despite receiving written invitations, patients often  
39 remained confused about why they had been summoned ("*What do you want to see me*  
40 *about then?*").  
41  
42  
43  
44  
45  
46

47 The requirement for data was – occasionally – the primary reason for the consultation. In  
48 one cardiovascular clinic a patient began by apologising for telephoning three days earlier to  
49 check whether her review was necessary. She had been reviewed in the hospital cardiology  
50 clinic the same week. The nurse responded by explaining that the practice is not always sent  
51 the information by the hospital "*and we have to have our records up to date.*" ~~—an explicit  
52 and unapologetic bureaucratisation of care. What is interesting here is not so much that the~~  
53  
54  
55



1  
2  
3  
4  
5  
6  
7 patient may well have had to attend two very similar appointments in one week, but that the  
8 need to keep the record 'up to date' is presented as adequate and sufficient reason for the  
9 appointment. The 'need' for data seemed to outweigh any need that this particular patient  
10 felt (or necessarily had) for care.  
11

12  
13 These examples illustrate that whilst on the one hand the electronic patient record facilitates  
14 the regular recall and review which are critical to a high quality chronic disease  
15 programme<sup>4747</sup> [Wagner, 1996 6188 /id] there are potential pitfalls to a highly automated  
16 recall system, especially if it is disconnected from the wider set of relationships within which  
17 care is delivered, or if the rationale behind it does not make sense to individual patients.  
18  
19

Field Code Changed

Formatted: Do not check spelling or grammar, Superscript

20  
21 The electronic record also shapes and constrains how the consultation unfolds moment-by-  
22 moment. Chronic disease consultations often (though not always) took a linear and  
23 standardised format. Consultations tended to start and finish with the same questions, and  
24 focus on information gathering and documentation. One consultation was interrupted on two  
25 occasions by the patient standing up to take his leave, the nurse advising "You can't go yet  
26 (laughing) ...we're not finished yet". It was common for nurses to face the computer screen  
27 as they explained the reason for 'calling the patient in', and the 'orderliness' of the clinic was  
28 often made explicit (e.g. "We'll start with your blood pressure"). Table 2 shows a detailed  
29 transcript revealing this institutional ordering in an asthma clinic.  
30  
31  
32

33  
34 [INSERT TABLE 2 ABOUT HERE]  
35

36  
37 In this example (Table 2), the nurse frames the consultation as an *assessment*, firstly to see  
38 how "your asthma's doing" (an assessment of the asthma) which she then reformulates as  
39 "what you're doing with it when it's good, what you do with it when it's bad" (an assessment  
40 of the patient's practices). This metaphorical separation of disease from patient was  
41 common. The use of the word "assessment" sets an evaluative tone and anticipates an  
42 enquiry which incorporates smoking status, inhaler technique, concordance with medication  
43 and peak flow measurement. The nurse emphasises (1:08 and 1:19) that it is *really* or *very*  
44 straightforward, and at 1:13 she counts on her fingers a three-part list, flagging the linearity  
45 of what is to follow and setting out what she and the patient should achieve. It might be  
46 interpreted as reassurance, but this is a reassurance about what he may expect of the  
47 *structure* of the clinic, not that his specific concerns will be addressed. Following this data  
48 extract, the nurse gestures towards the computer as she explains "What I've got here is  
49 some questions that I – I need to ask you...they're fairly straightforward ones but what they  
50 tend to do with is that they will flag up whether there >actually< we have got what w- what I  
51  
52  
53  
54  
55

1  
2  
3  
4  
5  
6  
7 *would call breakthrough symptoms.*” The institutional imperative is clear (*“I need to ask you”*)  
8 and again she highlights the *“straightforward”* nature of the task, as she identifies the  
9 template as the origin of the questions. As the patient begins to demonstrate his inhaler use,  
10 he coughs loudly five times, beats his chest demonstrably with his hand and announces:  
11

12  
13 Patient: *“I do suffer very badly from phlegm in the mornings...which I presume is part*  
14 *and parcel of having asthma.”*

15  
16 Nurse: *“It can be (.) yeah which (0.4) anyway I – we’ll talk about that in a*  
17 *minute...we’ll do the inhaler first.”*  
18  
19

20  
21 Despite weaving his own concerns into the assessment of ‘inhaler technique’ and using  
22 elaborate gestures for emphasis, the nurse steers the patient’s activity back to the  
23 institutional script and does not revisit the issue of the morning phlegm. She later goes on to  
24 enquire specifically about asthma symptoms, but not until almost 16 minutes into the 19  
25 minute consultation...when prompted by a template field reading “night symptoms”.  
26  
27

### 28 **The electronic record shapes what it means to be a patient**

29 The template contributes to the construction of ‘institutional’ versions of the patient and may  
30 make it difficult for professionals to retain a perspective on the unique individual. One nurse  
31 said that the structure can make it difficult to *“take a step back”* – that some patients return  
32 annually for asthma checks even though she wonders whether they are definitely asthmatic  
33 at all (*“once they have acquired a diagnosis they just keep coming back”*). Whilst the asthma  
34 clinic may seem a reasonable setting in which to review a patient whose diagnosis is  
35 provisional or uncertain, the template does not handle such ambiguity well, and the recall  
36 procedures behind it can lead to the ‘production’ of consultations and the production of  
37 patienthood (the ‘asthma patient’). There is considerable scope for unhelpful, potentially  
38 incorrect labelling of patients. An example is shown in the ethnographic fieldnotes in Box 2.  
39  
40  
41  
42  
43

44 [INSERT BOX 2 ABOUT HERE]  
45

46  
47 Putting aside the absurdity that a 2-year-old has a Read code for “Never smoked tobacco” in  
48 his record, the example in Box 2 shows the disparity between the individual narrative that  
49 was built in the clinic and the “minimum data set” in the institutional account.<sup>484846</sup> It also  
50 shows how the expressed ambiguity about the asthma diagnosis is wiped out (and not  
51 alluded to) in the record – numerous asthma Read codes are entered. Whilst this is sure to  
52 result in regular invitations to the clinic, the institutional ‘truth’ bears little resemblance to the  
53  
54  
55

1  
2  
3  
4  
5  
6  
7 reality it seeks to record. The contrast between the mother's relief at the *uncertainty* of the  
8 diagnosis, and the *certainty* which was constructed in the record is striking. More subtle,  
9 transient moments of ambiguity, which required the shaping of patients' accounts into an  
10 inflexible (often binary) categorisation, were common (e.g. a patient's hesitant 'not really'  
11 becomes 'no').  
12

### 13 14 15 **The electronic record shapes what it means to be a clinician**

16 The opportunity for nurses to develop new areas of expertise in chronic disease  
17 management is frequently described in terms of 'role-expansion', 'professional  
18 empowerment, or "*Liberating the Talents*",<sup>494947</sup> As the disease areas covered by the Quality  
19 and Outcomes Framework have increased, so has the variety of nurse-led, disease-specific  
20 consultations on offer. In this study, nurses were often defined by chronic disease specialty.  
21 For example, in one practice, photographs of the nurses in the waiting room had their  
22 disease-specific expertise listed alongside (e.g. Christine - Asthma). One practice newsletter  
23 read: "*Our practice nurses receive special training to monitor people with chronic diseases*  
24 *and to carry out many procedures independent of doctors.*" This entry not only constructs  
25 chronic disease as 'nursing work' but describes a 'monitoring' role which sounds different to  
26 the 'care' we may traditionally associate with nurses looking after the chronically sick. With  
27 nurses thus defined, general practitioners took on the role of 'trouble-shooter' or  
28 consultant,<sup>505048</sup> called upon when more complex problems arose. In one practice,  
29 healthcare assistants conducted cardiovascular and hypertension reviews. Although able to  
30 gather information needed to *inform* chronic disease management (e.g. blood pressure,  
31 details of smoking) healthcare assistants are not clinically qualified. This 'redistribution' of  
32 chronic disease management to the least qualified (and least costly) team member has been  
33 previously described and shifts the meaning of the term 'management' towards one of  
34 managing data rather than patients.<sup>18:5018:5018:48</sup>  
35  
36  
37  
38  
39  
40  
41

42 The extensive use of templates as a way of delivering chronic disease managements was  
43 rarely questioned. The little that was said was broadly positive, and echoed the "monitoring"  
44 perspective conveyed in the newsletter ("*templates encourage us to get to grips with the*  
45 *management of microalbuminuria in diabetes and take a more aggressive stance towards*  
46 *blood pressure control*"). Several nurses suggested they relied on templates and might  
47 easily forget things without them. However, one nurse said she tried to avoid relying too  
48 heavily on the template, as doing so tended to result in her "*losing her train of thought*"; she  
49 preferred to jot notes on paper to add to the template later. Some specific difficulties were  
50 voiced, such as the perception that important things may not be documented "*because there*  
51 *is nowhere in the template to put it*", and "*you sometimes become so absorbed in the*  
52  
53  
54  
55  
56  
57  
58  
59  
60

Field Code Changed

Field Code Changed

Field Code Changed

1  
2  
3  
4  
5  
6  
7 *template that you can miss what is right in front of you in the patient.*” On one occasion  
8 when the computer crashed midway through a cardiovascular check, the nurse apologised in  
9 advance (“*I’ll have to do it a little out of order because I’ve no computer*”) and again  
10 afterwards (“*I’m sorry it’s been such a higgledy-piggledy consultation*”). This incident  
11 highlighted the extent to which her work had become interwoven with technology use. It  
12 seems unlikely that this senior, experienced nurse could not do a cardiovascular check  
13 without the prompts before her eyes. Rather it was because her embodied practices had  
14 become so finely tuned to incorporate the technology that to conduct a consultation without  
15 had become almost impossible.  
16  
17  
18

19  
20 In one practice, an information technology manager was responsible for developing and  
21 maintaining computer templates, and he identified templates as a fundamental characteristic  
22 of quality care. A private company who had recently taken over the management of a local  
23 ‘underperforming’ practice was employing one of his GP colleagues to improve practice  
24 systems. He explained that “*they were very impressed with our templating*”; the doctor had  
25 duly provided copies of their templates for the ‘underperforming’ practice. The integration of  
26 templates (and a new word – “*templating*”) was presented not only as a *feature* of good  
27 practice, but as potentially constitutive of good practice in an organisation which was  
28 otherwise failing – a transferable ‘good’.  
29  
30  
31  
32

33 The template contributed to redefining ‘professional vision’<sup>43,42</sup> by encouraging particular  
34 ways of looking, categorising and sense-making, fostering a particular orientation to the  
35 world. captured in Goodwinman’s words: “*When disparate events are viewed through a*  
36 *single coding scheme, equivalent observations become possible*” (page 608).<sup>43</sup> For example  
37 areas of institutional relevance (such as those which attract points in the Quality and  
38 Outcomes Framework) were often privileged over patients’ more immediate concerns. The  
39 template shaped not only *what* was relevant to record, but also *how* this was recorded. For  
40 example symptoms were recorded as either ‘present’ or ‘absent’ when patients described a  
41 much more complex reality. The clarification of a patient’s experience ‘in general’ was  
42 sought more readily than ‘particular’ experiences. The template brought new definitions of  
43 nursing and GP work, new conceptualisations of practice and new appreciations of what  
44 constituted ‘good’ practice.  
45  
46  
47  
48

### 50 Using the template creatively

51 Some nurses displayed exceptional creativity in how they used the template. We illustrate  
52 this by reference to Tables 3 and 4 which show two extracts from a single consultation in the  
53 asthma clinic. In this consultation, the patient can see the screen if he turns his head slightly,  
54  
55  
56  
57  
58  
59  
60

Field Code Changed

Formatted: Font: Italic

Formatted: Do not check spelling or grammar, Superscript

Field Code Changed

1  
2  
3  
4  
5  
6  
7 but the nurse does not start to complete the template until ten minutes into the consultation.  
8 Until then, she faces him across the corner of the desk, occasionally jotting notes on a paper  
9 placed between them.  
10

11 [INSERT TABLE 3 ABOUT HERE]  
12  
13

14 The nurse uses several strategies to elicit a narrative at the outset (Table 3) beginning with  
15 an open invitation “*tell me ...*” The word “tell” invites a story, and she shifts into a posture  
16 displaying readiness to listen, moving her chair away from her desk (and the computer and  
17 her notes). The patient hesitates and there are some relatively long pauses in his telling, but  
18 she refrains from filling these with anything other than tokens of attentiveness. She mirrors  
19 the patient’s laugh and shrug of the shoulders from 1:10 to 1:15 in a way which is effective in  
20 encouraging him to tell some more.  
21  
22  
23

24  
25 She goes on to encourage the patient to describe his inhaler use, and learns that he had  
26 recently woken up short of breath. His inhaler had not worked well and he could not get back  
27 to sleep. She makes occasional notes, describes aloud what she is noting, then summarises  
28 the story which the patient confirms. Having established some confusion over when he  
29 should be using each of his two inhalers, she uses a picture of the respiratory tract as part of  
30 her explanation, saying “*I think if you know how the drug works on your body it makes sense*  
31 *how to use them.*” She goes on to check his height and peak flow rate, then joins him (“*let’s*  
32 *have a look*”) as they cluster around the peak flow meter, each holding one end of it. The  
33 nurse says that it wasn’t very good and that he can do better – which makes him laugh –  
34 then she demonstrates how to do it. After his second attempt they again cluster round the  
35 peak flow meter (N: “*tha::t was a bit bette::r ...LOOK four hundred a::nd eighty.*”) After a  
36 further attempt the nurse says “*Excellent. Well done. What we got? There we go. LOOK five*  
37 *hundred and thirty that time.*”  
38  
39  
40  
41  
42  
43

44 The nurse and patient are fully involved in this activity, in Goffman’s sense of being both  
45 cognitively and affectively engaged.<sup>23</sup> The nurse’s talk is inclusive (*let’s, we, what we got,*  
46 *there we go*) and her bodily conduct encourages a joint engagement in reading the peak  
47 flow meter. Having already created a collaborative environment, she turns to the computer  
48 for the first time almost ten minutes into the consultation (Table 4, 10.37).  
49  
50

51 [INSERT TABLE 4 ABOUT HERE]  
52  
53  
54  
55

1  
2  
3  
4  
5  
6  
7 Again the nurse uses inclusive language as she orients towards the screen, inviting the  
8 patient to look. Between 10:39 and 10:43 she makes a deliberate show of navigating  
9 towards the asthma template. She enters his height, points at the screen, makes a joke. By  
10 making the template deliberately visible and socialising around it she retains control over the  
11 progress of the consultation and legitimises her need to attend to some institutional work.  
12 But by involving the patient in the recording activity (not literally, but through making it a  
13 shared endeavour and using much inclusive language) she effectively maintains a patient-  
14 centred approach whilst briefly attending to institutional requirements.  
15  
16

17  
18 She invites further collaboration in making the template entry at 11:14 onwards (*five thirty*  
19 *was your best wasn't it*). The patient does not initially respond although he continues  
20 watching the screen. The computer automatically displays his "predicted peak flow rate  
21 (PEFR)". The nurse evaluates the measurement as a "*little bit under...but not too bad*",  
22 minimising any sense of trouble. But the mismatch between his 'actual' and his 'predicted'  
23 result prompts the nurse to reformulate her question to one which is more demanding of an  
24 answer ("*was five thirty your best?*") When the patient hesitates and suggests it may have  
25 been higher, the nurse suggests a recheck. This confirms the measurement, but the act of  
26 repeating it displays a collaborative approach. Neither nurse nor patient's account is taken  
27 as 'truth' – a re-measurement settles the matter. In summary, this nurse is successful in  
28 eliciting a narrative, whilst also making the bureaucratic requirements deliberately visible.  
29 She skilfully minimises the distance between 'individual' and 'institutional' framings of the  
30 patient.<sup>31</sup>  
31  
32  
33  
34  
35

Field Code Changed

36  
37 A different nurse described herself as a "*paper person*" and yet also used the words  
38 "*template driven*" to describe her work. She said she had found it impossible to combine  
39 "*getting through it all*" with what she regarded as a patient-centred approach. She had  
40 negotiated with her employing doctors that her diabetes appointments were 30 minutes long  
41 (instead of 15 minutes) "*otherwise I would have just been completing the boxes with no time*  
42 *for the patient*". In this statement she highlighted a perceived gap between the task of being  
43 "for" the patient and the demands of the template. This nurse went to great lengths to  
44 minimise her need to look at the computer during her consultations, seizing brief  
45 opportunities as they arose (e.g. as patients removed socks, for example). She often placed  
46 her left hand on the patient's arm as she rotated her chair to look at the screen, keeping it  
47 there as she typed with her right hand – an awkward posture, but one which allowed her to  
48 maintain a physical connection to the patient as she attended to the template. She always  
49 went into surgery thirty minutes before her clinic was due to start, to prepare a written page  
50 of notes for each patient in her notebook. She meticulously studied the record of each  
51  
52  
53  
54  
55

1  
2  
3  
4  
5  
6  
7 patient she was anticipating, and copied blood results and other information she thought she  
8 may need to refer to. She 'knew' the template, and would frequently anticipate the next field  
9 in the template before displaying it on the screen, weaving it into the consultation whilst  
10 keeping it relatively 'invisible' to patients.  
11

12  
13 In sociological terms, this particular nurse had internalised the template – working *with it* in a  
14 symbolic sense, but marginalising it from her embodied activity in the interaction. Her  
15 performed identity was as a 'paper person' who preferred to be "for" the patient in this new  
16 template-oriented 'field' of practice, but the template was indeed central to her  
17 practice (she was "template driven"). She was 'driven' in the sense that she ensured that she  
18 completed it – as demanded by the institution – but also 'driven' to find creative ways of  
19 working around it. It had become part of a new professional habitus, which helped  
20 to define her normative behaviours and expectations. She took the burden of managing the  
21 individual / institutional tension, but in this case it came at an opportunity cost to herself in  
22 terms of personal time, and a financial cost to her employer (since her consultations were  
23 now taking twice as long).  
24  
25

26  
27  
28  
29 These examples of exemplary practice are important evidence that the technology is by no  
30 means deterministic of practices, but that there is always scope for practitioners to work with  
31 technologies in ways which preserve the 'relational' aspects of care and maintain full  
32 involvement with the patient.<sup>5353</sup> The electronic record shapes but doesn't make; it constrains  
33 but does not prohibit; it makes possible but does not necessarily insist.  
34  
35

36  
37  
38 **Discussion**

39 **Summary of findings**

40  
41 In this paper we have focussed on the detailed practices of using computer templates in  
42 chronic disease management in UK general practice. In particular, we have highlighted the  
43 tension between different ways of framing the patient, and the requirement on clinicians  
44 (nurses especially) to sustain a dual orientation to both individual patient and institutional  
45 imperatives. This pressure to 'fit' unique individuals into institutional 'boxes' or to weave a  
46 bureaucratic process through a personal encounter, is evident at the macro-level  
47 of clinic organisation and in the moment-by-moment detail of clinical interaction, even down  
48 to the small gestures and nuance of talk. We have argued that electronic templates make a  
49 significant contribution to four interrelated phenomena: how disease is defined; how care is  
50 delivered; what it means to be a patient; what it means to be a clinician. In other words, the  
51  
52  
53  
54

Field Code Changed

Field Code Changed

Formatted: Font: Italic

Field Code Changed

Formatted: Do not check spelling or grammar, Superscript

Formatted: Font: Not Italic

Formatted: Font: Italic

Formatted: Font: Italic

Formatted: Font: Italic

Field Code Changed

1  
2  
3  
4  
5  
6  
7 use of templates changes the very nature of what it means to 'care' in the contemporary  
8 chronic disease clinic. As we have seen above, 'care' is often reformulated as 'carrying out  
9 procedures' and stripped of the relational aspects of the word 'care'. The template can be  
10 seen to do *definitional* work.  
11

12  
13 The template is not just a simple faithful record of what went on. Nor is it just an aide-  
14 m emoire – though it may ensure, for example, that foot pulses are palpated and blood  
15 pressures taken (important aspects of diabetes care) and it is quite likely that these will be  
16 done in the order set out in the template. The template does not simply identify things which  
17 must be done but comes to define what chronic diseases *are*. On the one hand, the template  
18 is an impoverished 'squeezed in' <sup>556652</sup> record of the encounter. It is where patients' stories  
19 morph into bytes of data; the particular becomes generalised; the complex is made discrete,  
20 simple and manageable, and uncertainty becomes categorised and contained. On the other  
21 hand, the template is *integral* to the consultation, and actively shapes what goes on,  
22 sustaining normative standards which are realised through consensus and performed daily  
23 through social practices. The work of transforming stories into data – and erasing ambiguity  
24 – is in itself complex interactional work for both clinician and patient. However this does not  
25 necessarily constitute the 'complex' response to a 'complex' problem as envisaged by Nolte  
26 et al, nor does it sit comfortably alongside the political rhetoric of 'nurse empowerment',<sup>10</sup>  
27  
28  
29  
30  
31  
32 <sup>494947</sup> This 'new' skilled human work does not appear in the completed template, and seems  
33 to go unrecognised – even by those who are engaged daily in doing it.  
34  
35

36  
37 At no point in our field work did we encounter any suggestion from participants that the care  
38 of patients with chronic diseases might be done otherwise. Arguably templates are taken-for-  
39 granted as part of 'good' chronic disease management. Nurses vary in their approaches, and  
40 individual nurses used different strategies within and across consultations according to  
41 emergent local contingencies. This is unsurprising. The constraints imposed by the template,  
42 and the inherent 'rationality-reality' gap<sup>29</sup> can be overcome (and our data suggest that they  
43 sometimes are) but this demands exceptional creativity. We have described one nurse's  
44 collaboration with a patient around the template and another who succeeded in  
45 simultaneously *internalising and excluding* the template. However these examples were  
46 unusual, and draw attention to what Blommaert calls "*creativity within constraints*" (page  
47 107),<sup>566653</sup> a local form of creativity which is situated in what he calls "*the borderline zone of*  
48 *existing hegemonies...it becomes creative because it is measurable against normative*  
49 *hegemonic standards, because it creates understandable contrasts to such standards*"  
50 (page 106). [It is also important to acknowledge that templates are still a relatively recent](#)  
51 [introduction to clinical practice and that although they appear to be embedded as part of](#)  
52  
53  
54  
55



[normative practice, it is possible that some clinicians are still on a learning trajectory with regard to modifying their practices to incorporate these new technologies.](#)

In the institutional account captured through the template, 'care' (specifically 'quality care' as currently incentivised in the Quality and Outcomes Framework) and patients with chronic diseases all start to look the same. Does this matter? One argument goes that as long as the interaction between clinician and patient facilitates the narrative, the particular, the complex and the ambiguous and this occurs within a therapeutic relationship which supports relational continuity, then it may not matter much. But close observation of actual practice suggests that, more often than not, nurses are constrained by the linear, instrumental logic of the template with its tendency to privilege biomedical, measurable concerns. The consultation can become a relatively bureaucratic transaction in which patients are shaped into an institutional framework<sup>555652</sup> and meaningful involvement is difficult to sustain.<sup>23</sup> Both nurse and patient experience institutional constraints on what may be talked about and what the chronic disease review can 'be'. Practices become 'regimented'.<sup>57:5857-5854;55</sup>

### Strengths and limitations of this study

A particular strength of this study rests with the sophisticated combination of qualitative ethnographic observation alongside video and screen capture, allowing us to open up the 'black box' of the electronic patient record to detailed scrutiny.<sup>31</sup> What emerges is a conceptualisation of the electronic record as *integral* to the social processes of consultation, not simply a peripheral 'add-on' to the consultation. Our approach has enabled us to study the subtle complexities of interaction between humans and technologies, whilst retaining a broad appreciation of the institutions within which these interactions take place.<sup>596056</sup> We have been able to build what anthropologists call a "thick description"<sup>606057</sup> of the electronic patient record in its social context – combining detailed observational description with analysis and reflective interpretation. It has enabled us to explore working practices at a level of detail that more conventional qualitative methods (such as interviews or semi-structured questionnaires) cannot reach. For example, our focus has been on *actual* social practice rather than on participants' reports alone, and our enquiry has extended into the 'backstage' regions<sup>3736</sup> of general practice as well as the consulting room. We have been able to highlight the profound influence of the template by drawing eclectically on a broad range of data sources, shifting constantly between 'zooming in' on the moment-by-moment detail of the consultation, and 'zooming out' to consider organisational practices (what Erickson has called the 'social microscope' and the 'social telescope').<sup>616158</sup> This linguistic

Field Code Changed

1  
2  
3  
4  
5  
6  
7 ethnographic approach offers great potential for the study of complex social practices in  
8 contemporary healthcare, including those which incorporate information technologies.  
9

10  
11 Our approach is time consuming and resource intensive, and our prioritisation of *depth*  
12 of analysis over breadth has meant that we have included only two general practices in this  
13 study and these may not be typical of all practices in how they approach either chronic  
14 disease management or the use of technologies. Furthermore, both practices used the same  
15 clinical system (EMIS-LV) and there may be important technical differences between  
16 systems. However as a principle we favoured what Stake has called 'opportunity to learn'  
17 over concerns about 'typicality' <sup>626250</sup> and we hope that our work prompts new ways of  
18 thinking about the use of templates in chronic disease management. Templates are not  
19 unique to the EMIS-LV system, and we suspect that our findings may resonate with the  
20 experience of many clinicians who are using electronic checklists in the clinic. Although our  
21 methodological approach does not allow us to quantify the extent to which clinicians are able  
22 to combine a patient-centred approach whilst meeting the needs of the institution, we have  
23 been able to observe a range of practices which highlight the need to think more critically  
24 about what is being accomplished through the implementation and use of electronic  
25 templates in this context.  
26  
27  
28  
29  
30

### 31 **Recommendations for policy and practice**

32  
33 Although considerable care is invested in ensuring the diligent use of electronic templates in  
34 general practice, much less attention is paid to how these are actually used by clinicians, or  
35 to the possibility that incorporating a template might profoundly change the way in which  
36 care is 'enacted' by professionals, and experienced by patients.  
37  
38  
39

40  
41 Ostensibly the data recording necessary for institutional processes such as the Quality and  
42 Outcomes Framework emerges effortlessly from regular clinical care, and serves to improve  
43 the quality of care. Our data show that paradoxically, the focus on what is measurable and  
44 recordable in templates, and designed to assure certain standards of 'quality' care (such as  
45 those identified in the QOF) can lead to a bureaucratisation of care and may serve to  
46 marginalise those aspects of 'quality' practice which lie beyond their focus, and which do not  
47 lend themselves to 'data capture'. These include – but are not limited to – the extent of the  
48 patient's opportunity to construct their narrative and the extent to which the clinician and  
49 patient are fully 'involved' in the interaction. Arguably these may well be aspects of care  
50 which mark out 'quality' care from 'minimum to be expected' care. Whilst incentivising  
51 clinicians may well result in better data quality it should not be assumed that the quality of  
52  
53  
54

1  
2  
3  
4  
5  
6  
7 care (in its most holistic sense) improves, although the care of the patient may be profoundly  
8 changed.  
9

10 We suggest that in educating for chronic disease management, it is essential to incorporate  
11 greater recognition of the way in which clinicians integrate the electronic patient record and  
12 to regard this as an integral aspect of the consultation. The rational institutional logic  
13 inherent in the template does not align easily with the complexity of emergent dialogue  
14 between clinician and patient and it seems unlikely that minor adjustments to the design of  
15 template fields would address the communication challenges that we have identified in our  
16 research. However, it is essential that clinicians grasp fully the importance of the dialogue  
17 and learn ways of responding dynamically, creatively and individually to particular patients'  
18 concerns so that -In particular, that special effort is made to ensure that the patient's unique  
19 experience is not overshadowed by institutional imperatives. Although we have identified  
20 examples of these practices as 'exceptional' (page 15) it is in these exceptional practices  
21 that we suggest there is considerable scope for optimism in the face of increasing  
22 technologisation of care. The challenge for clinicians and educators is to appreciate that the  
23 incorporation of templates and other technologies renders the consultation *more complex  
24 rather than less complex...and hence this is worthy of explicit educational attention.* -We  
25 would also urge a shift towards models of care delivery which embrace multimorbidity as the  
26 norm and which seek to embrace the complexity of this reality in primary care, while still  
27 allowing appropriate data capture to inform the evidence-based management of specific  
28 diseases.  
29  
30  
31  
32  
33  
34  
35  
36  
37

### 38 **Research ethics approval**

39 Research ethics approval was granted by Thames Valley Multi-centre Research Ethics  
40 Committee (06/MRE12/81) in January 2007 and subsequent amendments.  
41  
42

### 43 **Funding**

44 This work was funded by a research grant from the UK Medical Research Council  
45 (Healthcare Electronic Records in Organisations, 07/133) and a National Institute for Health  
46 Research Doctoral Fellowship Award (RDA/03/07/076) for DS. Our funders were not  
47 involved in the selection or analysis of data, or in contributing to the content of the final  
48 manuscript.  
49  
50  
51

### 52 **Data Sharing**

53  
54  
55  
56  
57  
58  
59  
60

Formatted: Font: Italic

1  
2  
3  
4  
5  
6  
7 No additional data available.

8  
9 **Acknowledgement**

10 We thank staff and patients in two UK general practices for their participation in this work.

11  
12  
13 **Contributorship**

14 The paper is based on a PhD thesis written by DS and supervised by TG and CR. DS and  
15 TG conceptualised the HERO study. DS completed all data collection. All authors  
16 contributed to interpretation of the data. The paper was drafted by DS and revised with input  
17 from TG and CR. All authors approve the final version. DS is the guarantor for the paper.  
18  
19  
20  
21  
22  
23  
24  
25  
26  
27  
28  
29  
30  
31  
32  
33  
34  
35  
36  
37  
38  
39  
40  
41  
42  
43  
44  
45  
46  
47  
48  
49  
50  
51  
52  
53  
54  
55  
56  
57  
58  
59  
60

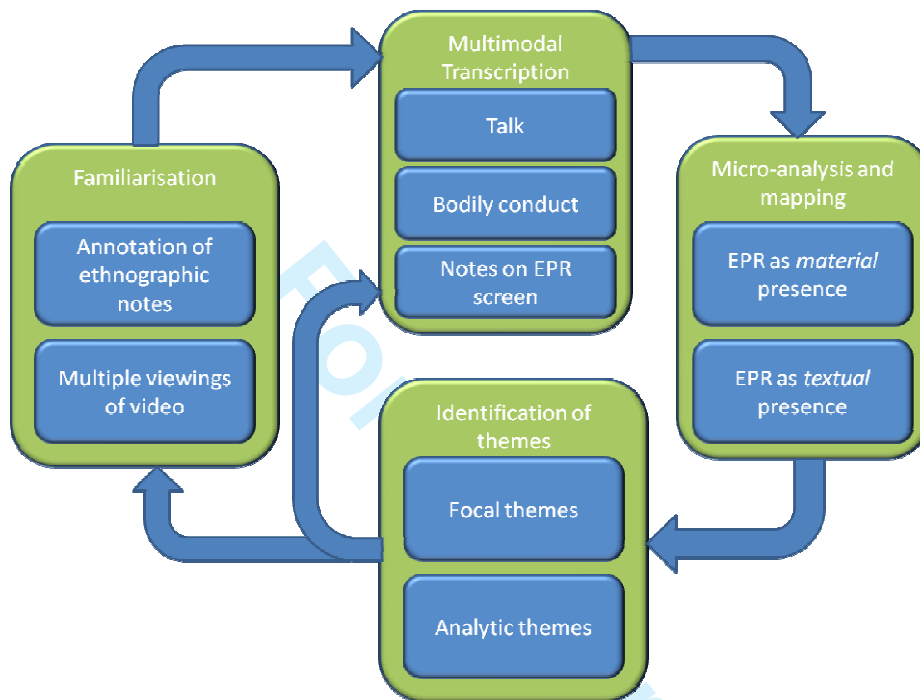

Figure 1. Approach to transcription and analysis

**Box 1. Framing the purpose of the chronic disease management clinic (ethnographic fieldnotes)**

A frail-looking 86 year old man struggled in to the clinic, barely able to walk. He was very deaf. He hung his walking stick over his chair and grimaced as he sat down, looking as if he was in pain. The nurse said loudly "We've called you in to look at you from the heart point of view. I know you have a lot of other things going on but we've called you in to look at your heart." She then asked "How often do you use the angina tablet under your tongue?" The patient replied in a way which made his most pressing concern clear: "Not much...for the simple reason that I can only crawl like a tortoise"  
Nurse: "and the simvastatin?"  
Patient: "no...I stopped that. I think it's giving me diarrhoea. These hearing aids are not very good you know. I've had it adjusted several times but I'm really disappointed. I had hoped for better than this"

**Box 2. Constructing patienthood in the asthma clinic (ethnographic fieldnotes)**

Sam, a lively 2-year-old came with his mum. He ran excitedly around the clinic room investigating every corner. His mum seemed exasperated and said she was not getting far with his treatment, a plastic “spacer” device to which the “pumps” were attached. The boy’s dad and grandparents were asthmatic, but Sam only saw his dad occasionally at weekends these days.

The nurse explained that the diagnosis of asthma cannot be certain in a 2-year-old. Things might be clearer by the time he was about 4. His mum was obviously relieved to know that it was not a definite thing. She was very anxious that her ex-partner wouldn’t know how to look after her son when he goes to visit. She asked “*There’s nothing I could have done to stop him getting it, is there?*” The nurse explained it was not her fault and did what she could to be reassuring. She explained what the different inhalers do...

The nurse pointed towards the computer, saying that she was going to make some notes. She completed the template line by line and there was no talking for several minutes. Sam ran towards the door and started rattling the door handle, but his mum said firmly “*NO...you’ve got to wait for the lady to finish her typing*”.

The nurse handed over a prescription and they left.

The EPR consisted of a collection of Read coded entries with some limited free text alongside:

*Never smoked tobacco*

*Inhaler technique moderate*

*Inhaler technique shown (needs to commence low dose ICS. I will monitor)*

*Symptoms occur at night (7/7)*

*Asthma limiting activities*

*Asthma management plan*

*Asthma compliance satisfactory (needs ICS)*

*Asthma daytime symptoms (consistent cough)*

*Asthma medication review*

*Asthma monitoring check done*

*Follow up asthma assessment (date)*

Table 1. Extract from consultation in diabetic clinic

| Time  | N/P | Words spoken /sounds                                                                                      | Bodily conduct                                                               | Screen                                                                                                               |
|-------|-----|-----------------------------------------------------------------------------------------------------------|------------------------------------------------------------------------------|----------------------------------------------------------------------------------------------------------------------|
| 18.54 | N   | Does the diabetes get you<br>↑ down Mr C?                                                                 | N -> EPR; P looking down doing shoelaces<br>N < -> P                         | Diabetes template, with fields completed relating to foot examination. Cursor highlights field "Eye Clinic" (Y or N) |
|       |     | (1.0)                                                                                                     | N < -> P. P puts hands on both knees.                                        |                                                                                                                      |
| 18.57 | P   | I get bored with life.                                                                                    | P frowns                                                                     |                                                                                                                      |
| 18.58 | N   | Bo::red?<br>What bored with the f.ood o:r                                                                 | P turns head to gaze at adjacent chair. N -> P<br>P < -> N                   |                                                                                                                      |
|       |     | (1.2)                                                                                                     |                                                                              |                                                                                                                      |
| 19.00 | P   | HA<br>HA HA                                                                                               | P turns to adjacent chair and lifts jumper                                   |                                                                                                                      |
| 19.02 | P   | .hhh ah well. °never mind°                                                                                | P lifts jumper as turns toward N again                                       |                                                                                                                      |
|       |     | (0.2)                                                                                                     |                                                                              |                                                                                                                      |
| 19.04 | P   | I<br>u::- used to be a drinking man                                                                       | P <-> N<br>P looks straight ahead. N remain looking at P                     |                                                                                                                      |
|       |     | (0.8)                                                                                                     |                                                                              |                                                                                                                      |
| 19.06 | N   | [right                                                                                                    |                                                                              |                                                                                                                      |
| 19.07 | P   | [And when I had to give up the beer I had to give up an awful lot of other things: (.) surprising really. | P holds jumper up in front of him and arranges it, looking at it as he talks |                                                                                                                      |
| 19.11 | N   | °<Yeah (.) yeah>°                                                                                         | N -> P                                                                       |                                                                                                                      |
|       | P   | mm                                                                                                        | P looks ahead, purses lips                                                   |                                                                                                                      |
| 19.13 | N   | So you have a whiskey                                                                                     | P turns to N                                                                 |                                                                                                                      |
|       |     | (0.8)                                                                                                     |                                                                              |                                                                                                                      |
| 19.15 | P   | Yeah I have a whiskey at night                                                                            | P < -> N                                                                     |                                                                                                                      |
| 19.16 | N   | °yeh°                                                                                                     | N nods                                                                       |                                                                                                                      |
|       |     | (0.2)                                                                                                     |                                                                              |                                                                                                                      |
| 19.17 | P   | Cos ↑whiskey hasn't got much sugar in [surprising                                                         | P returns to rearranging jumper holding it up in front                       |                                                                                                                      |
|       | N   | [no:                                                                                                      |                                                                              |                                                                                                                      |
|       | P   | its all been turned into alcohol a good whiskey maker so                                                  |                                                                              |                                                                                                                      |
|       |     | (0.8)                                                                                                     | P still holding jumper in front turns to N                                   |                                                                                                                      |
| 19.23 | N   | And beer has quite a lot of carbohydrate doesn't it                                                       | N -> P , N nodding slightly                                                  |                                                                                                                      |
|       | P   | [yeah                                                                                                     | P returns gaze to jumper, nodding                                            |                                                                                                                      |
|       |     | [when you think of the volume                                                                             |                                                                              |                                                                                                                      |
|       |     | (0.6)                                                                                                     | N turns gaze to her desk                                                     |                                                                                                                      |
| 19.27 | N   | °okay°                                                                                                    | N gazing at desk, P arranging jumper                                         |                                                                                                                      |
|       |     | (1.6)                                                                                                     |                                                                              |                                                                                                                      |
| 19.29 | N   | °All right then°                                                                                          |                                                                              |                                                                                                                      |
|       |     | ((N typing for 12 seconds))                                                                               | P looking ahead putting jumper over head. N rotates to face EPR              | Bypasses field "diet" Bypasses field "impotence" Next field is "depression screen" -enters 'Y'.                      |

Table 2. Setting up the frame for the asthma consultation

| Time  | N/P | Spoken word                                                                                                                                                           | Bodily conduct / notes on EPR                                                                      |
|-------|-----|-----------------------------------------------------------------------------------------------------------------------------------------------------------------------|----------------------------------------------------------------------------------------------------|
| 01:08 | N   | So really straightforward.<br>(0.4)                                                                                                                                   | N puts paper on desk<br>N rotates body and gaze to face P, her hands on her lap.<br>P looking at N |
| 01:09 | N   | Asthma assessment<br>(0.4)                                                                                                                                            |                                                                                                    |
|       | P   | Okay                                                                                                                                                                  | P nods                                                                                             |
| 01:11 | N   | to see how your asthma's doing:                                                                                                                                       | N raises both hands in front                                                                       |
| 01:13 | N   | what you're doing w- with it when<br>it's good, what you do with it<br>when it's bad,<br>(0.2)<br>have you any problems with your<br>↑inhalers<br>(0.4) .hhh<br>(0.5) | N uses fingers to count (on "good", "bad", "problems")<br>N hands open out in front of her         |
| 01:19 | N   | Very straightforward stuff                                                                                                                                            | N hands to lap                                                                                     |
|       | P   | Okay                                                                                                                                                                  | P nods                                                                                             |
|       | N   | [all right?<br>.hhh                                                                                                                                                   |                                                                                                    |
| 01:21 | N   | U::hm                                                                                                                                                                 | N rotates body and gaze to EPR screen, hands on lap                                                |
| 01:23 | N   | What I've got <u>here</u>                                                                                                                                             | N gestures her open hands towards the EPR screen (displaying<br>the patients "summary" screen)     |
| 01:24 | N   | Is that you're on:: (0.4) a purple<br>inhaler?                                                                                                                        | N rotates back towards P, bringing hands together                                                  |
| 01:26 | P   | (0.2)<br>Yeh (.)<br>uhm (0.2)<br>seretide.                                                                                                                            | P glances briefly towards the EPR screen                                                           |



Table 3. Opening of asthma consultation

| Time  |   | Words spoken                                                                                                   | Bodily conduct / EPR screen                                                                                                                                                                                                                                                                 |
|-------|---|----------------------------------------------------------------------------------------------------------------|---------------------------------------------------------------------------------------------------------------------------------------------------------------------------------------------------------------------------------------------------------------------------------------------|
| 00:57 | N | ..uh SO:<br>(0.6)<br>[ tell me<br>[C<br><br>(0.3)<br>what inhalers do you use (.)<br>and when do you use them. | N writing<br><br>Remains oriented to P as makes one keystroke to display prescriptions<br><br>N rotates her chair, pulling it back away from desk & re-orientating so that posture and gaze are towards P. She gestures towards his inhalers on the desk with her L hand on "what inhalers" |
|       |   | (0.4)                                                                                                          | N draws chair closer to P, still oriented towards him                                                                                                                                                                                                                                       |
| 1:02  | P | U::hm<br>(1.8)<br>Well say like if I get >sort<br>of< out of breath                                            | P rubs his nose<br>P puts his hand on inhaler, looking at N                                                                                                                                                                                                                                 |
|       |   | (0.4)                                                                                                          |                                                                                                                                                                                                                                                                                             |
| 1:07  | N | Uh uh                                                                                                          | N nods                                                                                                                                                                                                                                                                                      |
|       | P | then I'll take the brown one.                                                                                  | P points to brown inhaler on desk and looks at it                                                                                                                                                                                                                                           |
| 1:09  | N | Uh uh                                                                                                          | N nods, looking at P                                                                                                                                                                                                                                                                        |
|       |   | (1.2)                                                                                                          | Mutual gaze                                                                                                                                                                                                                                                                                 |
| 1:10  | P | but uhm                                                                                                        | P looks down at inhalers                                                                                                                                                                                                                                                                    |
|       |   | (2.7)                                                                                                          | P <-> N. P shrugs his shoulders                                                                                                                                                                                                                                                             |
| 1:14  | P | He [he                                                                                                         | P smiles, and slight laugh as looks at N                                                                                                                                                                                                                                                    |
|       | N | [he he he                                                                                                      | N joins P in smiling and a slight laugh. N shrugs her shoulders                                                                                                                                                                                                                             |
| 1:15  | P | I mean sometimes I'll use<br>the blue one.                                                                     | P lifts blue inhaler just off desk, looking at N                                                                                                                                                                                                                                            |
|       |   | (0.4)                                                                                                          |                                                                                                                                                                                                                                                                                             |
| 1:17  | N | Right                                                                                                          | N nods                                                                                                                                                                                                                                                                                      |

Table 4. Creative use of template

| Time                      | N/P | Words                                                                                                                                                                    | Bodily conduct                                                                                                                                                                                                  | Screen                                                                                                                                                                                                                                                               |
|---------------------------|-----|--------------------------------------------------------------------------------------------------------------------------------------------------------------------------|-----------------------------------------------------------------------------------------------------------------------------------------------------------------------------------------------------------------|----------------------------------------------------------------------------------------------------------------------------------------------------------------------------------------------------------------------------------------------------------------------|
| 10.37                     | N   | Let's pop it in the screen and see what we've got.                                                                                                                       | N pulls her chair in to the desk, gazing at screen. P ->EPR                                                                                                                                                     | Consultation screen                                                                                                                                                                                                                                                  |
| 10.39                     | N   | [A::dd<br>[C<br>(C)<br>[Templates<br>[C<br>(C)<br>[Respiratory<br>[C<br>(C)<br>[Asthma<br>[C<br>(C)                                                                      | N types keystrokes with her R hand holding PEFR meter in her L hand.<br>P looks at screen throughout                                                                                                            | Consultation screen. Entry 2 months earlier by receptionist – <i>Asthma check due</i> .<br>Navigates to "templates"<br>List of templates presented<br><br>Selects R – respiratory templates<br><br>There are 4 respiratory templates from which she selects A asthma |
| 10.43                     | N   | So<br>Monitoring check [DONE<br>[C<br><br>[Now<br>[C<br>your height was a hundred and seventy one point five<br>f:::ve<br><br>.hhh look you've <u>grown</u> a centimetre | N looks down at piece of paper to L of her desk then types in his height into template<br><br>N gazes at screen and points to the screen sweeping finger across to show him the previous height on the template | First line in template "monitoring done" – she adds Y (yes). Hits return so today's date is entered. Then skips a line called "except report"<br>Field: O/E height,                                                                                                  |
| 10.49                     | P   | Have I<br>HE HE (laughs)<br>[C C]<br>(0.8)<br><br>[Doesn't show it<br>[C                                                                                                 | [return]                                                                                                                                                                                                        | Field: O/E weight, last recorded entry 16m ago                                                                                                                                                                                                                       |
|                           | N   | he he<br>(0.2)                                                                                                                                                           |                                                                                                                                                                                                                 | Field: smoking status (7 options). Last recorded entry "Never" 30m ago                                                                                                                                                                                               |
| (Transcript not shown)... |     |                                                                                                                                                                          |                                                                                                                                                                                                                 |                                                                                                                                                                                                                                                                      |
| 11.11                     | N   | O:kay<br>↑SO::<br>(1.0)                                                                                                                                                  | N looks down at paper on her desk, pointing at it with R hand                                                                                                                                                   | Field: Peak Flow Rate                                                                                                                                                                                                                                                |
| 11.14                     | N   | Five <u>thirty</u> was your best wasn't it<br>(( C C C C )) (3.7)                                                                                                        | N->EPR; P ->EPR                                                                                                                                                                                                 |                                                                                                                                                                                                                                                                      |
| 11.19                     | N   | So: your predicted is 600 >so it's a little bit< under but that's not too bad                                                                                            | N and P looking at screen                                                                                                                                                                                       | Enters 530, return displays today's date. EPR calculates predicted PEFR as 600                                                                                                                                                                                       |
| 11.24                     | N   | ↑was five thirty your best?<br>(1.8)                                                                                                                                     | N -> EPR; P-> EPR<br><br>N reaches for PEFR meter and looks at gauge. P -> N                                                                                                                                    |                                                                                                                                                                                                                                                                      |
| 11.27                     | P   | ["was it five eighty?"]                                                                                                                                                  | N tightens cap on PEFR, P looking at N                                                                                                                                                                          |                                                                                                                                                                                                                                                                      |
|                           | N   | [Just do it once more for me                                                                                                                                             |                                                                                                                                                                                                                 |                                                                                                                                                                                                                                                                      |
| 11.29                     | N   | DID YOU::?                                                                                                                                                               | N passes PEFR to P who stands up as receives it                                                                                                                                                                 |                                                                                                                                                                                                                                                                      |

## Appendix

### Transcribing conventions, adapted from Atkinson and Heritage (1984)

|                                                                                     |                                                               |
|-------------------------------------------------------------------------------------|---------------------------------------------------------------|
| [ onset of overlapping speech                                                       | .hhh inbreath                                                 |
| ] end of spate of overlapping talk                                                  | Hhh outbreath                                                 |
| [[ speakers start a turn simultaneously                                             | = no pause between speakers; contiguous utterances            |
| : preceding sound is lengthened or drawn out<br>(more : means greater prolongation) | (( )) a non verbal activity (e.g. C = keystroke in this work) |
| <u>Underlining</u> emphasis                                                         | (text) unclear fragment of text                               |
| (.) pause of less than 0.2 seconds                                                  | . falling tone (not necessarily end of sentence)              |
| (0.4) pause, in tenths of a second                                                  | ? rising inflection (not necessarily a question)              |
| ↑↓ marked rising / falling intonation                                               | <b>CAPITALS</b> louder than surrounding talk                  |
| >text< the talk they surround is quicker than surrounding talk                      | <text> the talk they surround is slower than surrounding talk |
| °° the talk they surround is quieter than surrounding talk                          |                                                               |

### Reference List

- (1) Wagner E, Austin B, Von Korff M. Organising care for patients with chronic illness. *Milbank Quarterly* 1996; 74(4):511-544.
- (2) Ham C. The ten characteristics of the high-performing chronic care system. *Health Economics, Policy and Law* 2010; 5:71-90.
- (3) Greenhalgh T, Potts HWW, Wong G, Bark P, Swinglehurst D. Tensions and Paradoxes in Electronic Patient Record Research: A Systematic Literature Review Using the Meta-narrative Method. *The Milbank Quarterly* 2009; 87(4):729-788.
- (4) Black AD, Car J, Pagliari C, Anandan C, Cresswell K, Bokun T et al. The Impact of eHealth on the Quality & Safety of Health Care: A Systematic Overview. *PLoS Med* 2011; 8(1):e1000387.
- (5) Monteiro E, Hepsø. Purity and Danger of an Information Infrastructure. *Systemic Practice and Action Research* 2002; 15(2):145-167.
- (6) Department of Health. Improving chronic disease management. Downloadable from [http://www.dh.gov.uk/prod\\_consum\\_dh/groups/dh\\_digitalassets/@dh/@en/document\\_s/digitalasset/dh\\_4075213.pdf](http://www.dh.gov.uk/prod_consum_dh/groups/dh_digitalassets/@dh/@en/document_s/digitalasset/dh_4075213.pdf). 2004.
- (7) Singh D, Ham C. Improving care for people with long term conditions A review of UK and international management frameworks. Birmingham: NHS Institute for Innovation and Improvement; University of Birmingham; 2006.
- (8) Berg M. Implementing information systems in health care organizations: myths and challenges. *International Journal of Medical Informatics* 2001; 64:143-156.
- (9) General Practitioners Committee. Quality and Outcomes Framework. Guidance - Updated August 2004. Downloadable from [http://www.dh.gov.uk/prod\\_consum\\_dh/groups/dh\\_digitalassets/@dh/@en/document\\_s/digitalasset/dh\\_4088693.pdf](http://www.dh.gov.uk/prod_consum_dh/groups/dh_digitalassets/@dh/@en/document_s/digitalasset/dh_4088693.pdf). 2009.
- (10) Nolte E, Knai C, McKee M. Managing chronic conditions: An introduction to the experience in eight countries. In: Nolte E, Knai C, McKee M, editors. *Managing chronic conditions*. European Observatory on Health Systems and Policies; 2008. 1-14.
- (11) Guthrie B, Saultz JW, Freeman GK, Haggerty L. Continuity of care matters. *BMJ* 2008; 337:a867.
- (12) Roland M, Campbell S, Bailey N, Whalley D, Sibbald B. Financial incentives to improve the quality of primary care in the UK: predicting the consequences of change. *Primary Health Care Research and Development* 2006; 7:18-26.
- (13) Watt G. Blue sky research for primary care: A discussion paper. Downloadable from <http://www.sapc.ac.uk/images/documents/blue.pdf>. Society for Academic Primary Care; 2011.

**Formatted:** Font: 12 pt, Do not check spelling or grammar

**Formatted:** Space After: 12 pt

**Formatted:** Font: Italic, Do not check spelling or grammar

**Formatted:** Font: Italic, Do not check spelling or grammar

**Formatted:** Font: Italic, Do not check spelling or grammar

**Formatted:** Font: Italic, Do not check spelling or grammar

**Formatted:** Font: Italic, Do not check spelling or grammar

**Formatted:** Font: Italic, Do not check spelling or grammar

**Formatted:** Font: Italic, Do not check spelling or grammar

**Formatted:** Font: Italic, Do not check spelling or grammar

1  
2  
3  
4  
5  
6  
7  
8  
9  
10  
11  
12  
13  
14  
15  
16  
17  
18  
19  
20  
21  
22  
23  
24  
25  
26  
27  
28  
29  
30  
31  
32  
33  
34  
35  
36  
37  
38  
39  
40  
41  
42  
43  
44  
45  
46  
47  
48  
49  
50  
51  
52  
53  
54  
55  
56  
57  
58  
59  
60

(14) Fortin M, Soubhi H, Hudon C, Bayliss E, van den Akker M. Multimorbidity's many challenges. *BMJ* 2007; 334.

Formatted: Font: Italic, Do not check spelling or grammar

(15) The NIHR School for Primary Care Research. See: [http://www.nihr.ac.uk/research/Pages/programmes\\_primary\\_care\\_research.aspx](http://www.nihr.ac.uk/research/Pages/programmes_primary_care_research.aspx). 2012.

(16) Rhodes P, Langdon M, Rowley E, Wright J, Small N. What Does the Use of a Computerized Checklist Mean for Patient-Centred Care? The Example of a Routine Diabetes Review. *Qualitative Health Research* 2006; 16(3):353-376.

Formatted: Font: Italic, Do not check spelling or grammar

(17) McDonald R, Harrison S, Checkland K, Campbell S, Roland M. Impact of financial incentives on clinical autonomy and internal motivation in primary care: ethnographic study. *BMJ* 2007; 39239.890810.BE.

Formatted: Font: Italic, Do not check spelling or grammar

(18) Checkland K, McDonald R, Harrison S. Ticking Boxes and Changing the Social World: Data Collection and the New UK General Practice Contract. *Social Policy & Administration* 2007; 41(7):693-710.

Formatted: Font: Italic, Do not check spelling or grammar

(19) Edgar A. The expert patient: Illness as practice. *Medicine, Health Care and Philosophy* 2005; 8:165-171.

Formatted: Font: Italic, Do not check spelling or grammar

(20) Frank A. *The Wounded Storyteller: Body, Illness, and Ethics*. Chicago: University of Chicago Press; 1995.

(21) Kleinmann A. *The illness narratives: suffering, healing and the human condition*. New York: Basic Books; 1988.

(22) Strauss AL. *Chronic illness and the quality of life*. St. Louis: Mosby; 1975.

(23) Goffman E. *Involvement. Behavior in Public Places*. New York: The Free Press; 1966. 33-42.

(24) Berger J, Mohr J. *A Fortunate Man; the Story of a Country Doctor*. The Penguin Press; 1967.

(25) Heath I. *The Mystery of General Practice*. Nuffield Provincial Hospitals Trust, London; 1995.

(26) Charon R. Narrative Medicine: Form, Function, and Ethics. *Annals of Internal Medicine* 2001; 134(1):83-87.

Formatted: Font: Italic, Do not check spelling or grammar

(27) Greenhalgh T, Hurwitz B. Why study narrative? *BMJ* 1999; 318:48-50.

Formatted: Font: Italic, Do not check spelling or grammar

(28) Balint M. *The Doctor, His Patient and the Illness*. 2nd ed. Edinburgh: Churchill Livingstone; 1964.

(29) Heeks R, Mundy D, Salazar A. *Why Health Care Information Systems Succeed or Fail*. University of Manchester: Institute for Development Policy and Management; 1999.

1  
2  
3  
4  
5  
6  
7  
8  
9  
10  
11  
12  
13  
14  
15  
16  
17  
18  
19  
20  
21  
22  
23  
24  
25  
26  
27  
28  
29  
30  
31  
32  
33  
34  
35  
36  
37  
38  
39  
40  
41  
42  
43  
44  
45  
46  
47  
48  
49  
50  
51  
52  
53  
54  
55  
56  
57  
58  
59  
60

(30) Berg M. Health care work and patient care information systems. *Health Information Management - integrating information technology in health care work*. 2004. 45-64.

(31) Swinglehurst D, Roberts C, Greenhalgh T. Opening up the "black box" of the electronic patient record: A linguistic ethnographic study in general practice. *Communication and Medicine* 2011; 8(1):3-15.

(32) Berg M. Of Forms, Containers, and the Electronic Medical Record: Some Tools for a Sociology of the Formal. *Science, Technology & Human Values* 1997; 22(4):403-433.

(33) Berg M. Practices of reading and writing: the constitutive role of the patient record in medical work. *Sociology of Health and Illness* 1996; 18(4):499-524.

(34) Timmermans S, Berg M. The gold standard: The challenge of evidence-based medicine and standardization in health care. Philadelphia: Temple University Press; 2003.

(35) Harré R. Material Objects in Social Worlds. *Theory Culture Society* 2002; 19(5-6):23-33.

(36) Swinglehurst D, Greenhalgh T, Myall M, Russell J. Ethnographic study of ICT-supported collaborative work routines in general practice. *BMC Health Serv Res* 2010; 10:348.

(37) Goffman E. Regions and Region Behaviour. *The Presentation of Self in Everyday Life*. London: Penguin Books; 1959. 109-140.

(38) Green J, Thorogood N. *Qualitative Methods for Health Research*. London, California, New Delhi: SAGE Publications Ltd; 2004.

(39) Rampton B, Tusting K, Maybin J, Barwell R, Creese A, Lytra V. UK Linguistic Ethnography: A discussion paper. Downloadable from <http://www.ling-ethnog.org.uk/documents/papers/ramptonetal2004.pdf>. 2004.

(40) Roberts C, Sarangi S. Theme-oriented discourse analysis of medical encounters. *Medical Education* 2005; 39:632-640.

(41) Atkinson JM, Heritage J. Transcript notation. In: Atkinson JM, Heritage J, editors. *Structures of Social Action: Studies in Conversation Analysis*. Cambridge: Cambridge University Press; 1984. ix-xvi.

(42) Jewitt C. Towards a multimodal analysis. *Technology, literacy and learning: a multimodal approach*. Abingdon: Routledge; 2006. 32-52.

(43) Goodwin C. Professional Vision. *American Anthropologist* 1994; 96(3):606-633.

(44) Blommaert J. Sociolinguistic scales. *Working Papers in Urban Language & Literacies, Paper 37*. Institute of Education; 2006.

(45) Sarangi S, Slembrouck S. The pragmatics of information exchange in bureaucratic discourse. In: Sarangi S, Slembrouck S, editors. *Language, Bureaucracy & Social Control*. Harlow: Addison Wesley Longman Limited; 1996. 17-35.

**Formatted:** Font: Italic, Do not check spelling or grammar

**Formatted:** Font: Italic, Do not check spelling or grammar

**Formatted:** Font: Italic, Do not check spelling or grammar

**Formatted:** Font: Italic, Do not check spelling or grammar

**Formatted:** Font: Italic, Do not check spelling or grammar

**Formatted:** Font: Italic, Do not check spelling or grammar

**Formatted:** Font: Italic, Do not check spelling or grammar

- (46) Roberts C, Sarangi S, Southgate L, Wakeford R, Wass V, May C. Oral examinations - equal opportunities, ethnicity, and fairness in the MRCGP. *BMJ* 2000; 320:370.
- (47) Wagner E, Austin B, Von Korff M. Organising care for patients with chronic illness. *Milbank Quarterly* 1996; 74(4):511-544.
- (48) May C, Rapley T, Moreira T, Finch T, Heaven B. Technogovernance: Evidence, subjectivity, and the clinical encounter in primary care medicine. *Social Science & Medicine* 2006; 62:1022-1030.
- (49) Department of Health. Liberating the Talents: Helping primary care trusts and nurses to deliver the NHS Plan. Downloadable from [http://www.dh.gov.uk/en/Publicationsandstatistics/Publications/PublicationsPolicyAndGuidance/DH\\_4007473](http://www.dh.gov.uk/en/Publicationsandstatistics/Publications/PublicationsPolicyAndGuidance/DH_4007473). 2002.
- (50) Charles-Jones H, Latimer J, May C. Transforming general practice: the redistribution of medical work in primary care. *Sociology of Health and Illness* 2003; 25(1):71-92.
- (51) Bourdieu P. Outline of a Theory of Practice. Cambridge: Polity; 1977.
- (52) Bourdieu P. The Logic of Practice. Cambridge: Polity; 1990.
- (53) Goffman E. Involvement. Behavior in Public Places. New York: The Free Press; 1966. 33-42.
- (54) Roberts C, Campbell S. Fitting stories into boxes: rhetorical and textual constraints on candidates' performances in British job interviews. *Journal of Applied Linguistics* 2005; 2(1):45-73.
- (55) Douglas M. Institutions Do the Classifying. How Institutions Think. New York: Syracuse University Press; 1986. 91-109.
- (56) Blommaert J. Choice and Determination. Discourse: Key topics in sociolinguistics. Cambridge: Cambridge University Press; 2005. 98-124.
- (57) Blommaert J. Discourse. Cambridge: Cambridge University Press; 2005.
- (58) Blommaert J, Collins J, Slembrouck S. Polycentricity and interactional regimes in "global neighbourhoods". *Ethnography* 2005; 6(2):205-235.
- (59) Greenhalgh T, Swinglehurst D. Studying technology use as social practice: the untapped potential of ethnography. *BMC Medicine* 2011; 9:45.
- (60) Geertz C. Thick Description: Toward an Interpretive Theory of Culture. The Interpretation of Cultures. New York: Basic Books; 1973. 3-30.
- (61) Erickson F. Talk and Social Theory. Cambridge: Polity; 2004.
- (62) Stake RE. Qualitative Case Studies. In: Denzin NK, Lincoln YS, editors. The Sage Handbook of Qualitative Research. 3rd ed. Sage Publications, Inc; 2005. 443-466.

#### Reference List

**Formatted:** Font: Italic, Do not check spelling or grammar

**Formatted:** Font: Italic, Do not check spelling or grammar

**Formatted:** Font: Italic, Do not check spelling or grammar

**Formatted:** Font: Italic, Do not check spelling or grammar

**Formatted:** Font: Italic, Do not check spelling or grammar

**Formatted:** Font: Italic, Do not check spelling or grammar

**Formatted:** Font: Italic, Do not check spelling or grammar

**Formatted:** Left, Indent: Left: 0", Hanging: 0.5", Tab stops: 0.38", Right + 0.5", Left

**Formatted:** Font: 12 pt, Do not check spelling or grammar

- 1  
2  
3  
4  
5  
6  
7  
8 ~~(1) Wagner E, Austin B, Von Korff M. Organising care for patients with chronic illness. *Milbank Quarterly* 1996; 74(4):511-544.~~
- 9  
10 ~~(2) Ham C. The ten characteristics of the high performing chronic care system. *Health Economics, Policy and Law* 2010; 5:71-90.~~
- 11  
12  
13 ~~(3) Greenhalgh T, Potts HWW, Wong G, Bark P, Swinglehurst D. Tensions and Paradoxes in Electronic Patient Record Research: A Systematic Literature Review Using the Meta-narrative Method. *The Milbank Quarterly* 2009; 87(4):729-788.~~
- 14  
15  
16 ~~(4) Black AD, Car J, Pagliari C, Anandan C, Cresswell K, Bokun T et al. The Impact of eHealth on the Quality & Safety of Health Care: A Systematic Overview. *PLoS Med* 2011; 8(1):e1000387.~~
- 17  
18  
19 ~~(5) Monteiro E, Hepsø. Purity and Danger of an Information Infrastructure. *Systemic Practice and Action Research* 2002; 15(2):145-167.~~
- 20  
21  
22  
23 ~~(6) Department of Health. Improving chronic disease management. Downloadable from [http://www.dh.gov.uk/prod\\_consum\\_dh/groups/dh\\_digitalassets/@dh/@en/document\\_s/digitalasset/dh\\_4075213.pdf](http://www.dh.gov.uk/prod_consum_dh/groups/dh_digitalassets/@dh/@en/document_s/digitalasset/dh_4075213.pdf). 2004.~~
- 24  
25  
26  
27 ~~(7) Singh D, Ham C. Improving care for people with long term conditions A review of UK and international management frameworks. Birmingham: NHS Institute for Innovation and Improvement; University of Birmingham; 2006.~~
- 28  
29  
30  
31 ~~(8) Berg M. Implementing information systems in health care organizations: myths and challenges. *International Journal of Medical Informatics* 2001; 64:143-156.~~
- 32  
33  
34 ~~(9) General Practitioners Committee. Quality and Outcomes Framework. Guidance— Updated August 2004. Downloadable from [http://www.dh.gov.uk/prod\\_consum\\_dh/groups/dh\\_digitalassets/@dh/@en/document\\_s/digitalasset/dh\\_4088693.pdf](http://www.dh.gov.uk/prod_consum_dh/groups/dh_digitalassets/@dh/@en/document_s/digitalasset/dh_4088693.pdf). 2009.~~
- 35  
36  
37  
38 ~~(10) Nolte E, Knai C, McKee M. Managing chronic conditions: An introduction to the experience in eight countries. In: Nolte E, Knai C, McKee M, editors. *Managing chronic conditions*. European Observatory on Health Systems and Policies; 2008. 1-14.~~
- 39  
40  
41  
42  
43 ~~(11) Guthrie B, Saultz JW, Freeman GK, Haggerty L. Continuity of care matters. *BMJ* 2008; 337:a867.~~
- 44  
45  
46 ~~(12) Roland M, Campbell S, Bailey N, Whalley D, Sibbald B. Financial incentives to improve the quality of primary care in the UK: predicting the consequences of change. *Primary Health Care Research and Development* 2006; 7:18-26.~~
- 47  
48  
49  
50 ~~(13) Watt G. Blue sky research for primary care: A discussion paper. Downloadable from <http://www.sape.ac.uk/images/documents/blue.pdf>. Society for Academic Primary Care; 2011.~~
- 51  
52  
53  
54 ~~(14) Fortin M, Soubhi H, Hudon C, Bayliss E, van den Akker M. Multimorbidity's many challenges. *BMJ* 2007; 334.~~

Formatted: Space After: 12 pt

Formatted: Font: Italic, Do not check spelling or grammar

Formatted: Font: Italic, Do not check spelling or grammar

Formatted: Font: Italic, Do not check spelling or grammar

Formatted: Font: Italic, Do not check spelling or grammar

Formatted: Font: Italic, Do not check spelling or grammar

Formatted: Font: Italic, Do not check spelling or grammar

Formatted: Font: Italic, Do not check spelling or grammar

Formatted: Font: Italic, Do not check spelling or grammar

Formatted: Font: Italic, Do not check spelling or grammar



- 1  
2  
3  
4  
5  
6  
7  
8  
9  
10  
11  
12  
13  
14  
15  
16  
17  
18  
19  
20  
21  
22  
23  
24  
25  
26  
27  
28  
29  
30  
31  
32  
33  
34  
35  
36  
37  
38  
39  
40  
41  
42  
43  
44  
45  
46  
47  
48  
49  
50  
51  
52  
53  
54  
55  
56  
57  
58  
59  
60
- ~~(15) The NIHR School for Primary Care Research. See: [http://www.nihr.ac.uk/research/Pages/programmes\\_primary\\_care\\_research.aspx](http://www.nihr.ac.uk/research/Pages/programmes_primary_care_research.aspx); 2012.~~
- ~~(16) Rhodes P, Langdon M, Rowley E, Wright J, Small N. What Does the Use of a Computerized Checklist Mean for Patient-Centred Care? The Example of a Routine Diabetes Review. *Qualitative Health Research* 2006; 16(3):353-376.~~
- ~~(17) McDonald R, Harrison S, Checkland K, Campbell S, Roland M. Impact of financial incentives on clinical autonomy and internal motivation in primary care: ethnographic study. *BMJ* 2007; 39239.890810.BE.~~
- ~~(18) Checkland K, McDonald R, Harrison S. Ticking Boxes and Changing the Social World: Data Collection and the New UK General Practice Contract. *Social Policy & Administration* 2007; 41(7):693-710.~~
- ~~(19) Edgar A. The expert patient: Illness as practice. *Medicine, Health Care and Philosophy* 2005; 8:165-171.~~
- ~~(20) Frank A. The Wounded Storyteller: Body, Illness, and Ethics. Chicago: University of Chicago Press; 1995.~~
- ~~(21) Kleinmann A. The illness narratives: suffering, healing and the human condition. New York: Basic Books; 1988.~~
- ~~(22) Strauss AL. Chronic illness and the quality of life. St. Louis: Mosby; 1975.~~
- ~~(23) Goffman E. Involvement. Behavior in Public Places. New York: The Free Press; 1966. 33-42.~~
- ~~(24) Berger J, Mohr J. A Fortunate Man; the Story of a Country Doctor. The Penguin Press; 1967.~~
- ~~(25) Heath I. The Mystery of General Practice. Nuffield Provincial Hospitals Trust, London; 1995.~~
- ~~(26) Charon R. Narrative Medicine: Form, Function, and Ethics. *Annals of Internal Medicine* 2001; 134(1):83-87.~~
- ~~(27) Greenhalgh T, Hurwitz B. Why study narrative? *BMJ* 1999; 318:48-50.~~
- ~~(28) Balint M. The Doctor, His Patient and the Illness. 2nd ed. Edinburgh: Churchill Livingstone; 1964.~~
- ~~(29) Heeks R, Mundy D, Salazar A. Why Health Care Information Systems Succeed or Fail. University of Manchester: Institute for Development Policy and Management; 1999.~~
- ~~(30) Berg M. Health care work and patient care information systems. *Health Information Management - integrating information technology in health care work*. 2004. 45-64.~~

**Formatted:** Font: Italic, Do not check spelling or grammar

**Formatted:** Font: Italic, Do not check spelling or grammar

**Formatted:** Font: Italic, Do not check spelling or grammar

**Formatted:** Font: Italic, Do not check spelling or grammar

**Formatted:** Font: Italic, Do not check spelling or grammar

**Formatted:** Font: Italic, Do not check spelling or grammar

- 1  
2  
3  
4  
5  
6  
7 ~~(31) Swinglehurst D, Roberts C, Greenhalgh T. Opening up the "black box" of the~~  
8 ~~electronic patient record: A linguistic ethnographic study in general practice.~~  
9 ~~*Communication and Medicine* 2011; 8(1):3-15.~~
- 10 ~~(32) Berg M. Of Forms, Containers, and the Electronic Medical Record: Some Tools for a~~  
11 ~~Sociology of the Formal. *Science, Technology & Human Values* 1997; 22(4):403-433.~~
- 12 ~~(33) Berg M. Practices of reading and writing: the constitutive role of the patient record in~~  
13 ~~medical work. *Sociology of Health and Illness* 1996; 18(4):499-524.~~
- 14 ~~(34) Timmermans S, Berg M. The gold standard: The challenge of evidence based~~  
15 ~~medicine and standardization in health care. Philadelphia: Temple University Press;~~  
16 ~~2003.~~
- 17 ~~(35) Harré R. Material Objects in Social Worlds. *Theory Culture Society* 2002; 19(5-6):23-~~  
18 ~~33.~~
- 19 ~~(36) Swinglehurst D, Greenhalgh T, Myall M, Russell J. Ethnographic study of ICT-~~  
20 ~~supported collaborative work routines in general practice. *BMC Health Serv Res*~~  
21 ~~2010; 10:348.~~
- 22 ~~(37) Goffman E. Regions and Region Behaviour. *The Presentation of Self in Everyday*~~  
23 ~~*Life*. London: Penguin Books; 1959. 109-140.~~
- 24 ~~(38) Green J, Thorogood N. Qualitative Methods for Health Research. London, California,~~  
25 ~~New Delhi: SAGE Publications Ltd; 2004.~~
- 26 ~~(39) Rampton B, Tusting K, Maybin J, Barwell R, Creese A, Lytra V. UK Linguistic~~  
27 ~~Ethnography: A discussion paper. Downloadable from [http://www.ling-](http://www.ling-ethn.org.uk/documents/papers/ramptonetal2004.pdf)~~  
28 ~~[ethn.org.uk/documents/papers/ramptonetal2004.pdf](http://www.ling-ethn.org.uk/documents/papers/ramptonetal2004.pdf). 2004.~~
- 29 ~~(40) Roberts C, Sarangi S. Theme-oriented discourse analysis of medical encounters.~~  
30 ~~*Medical Education* 2005; 39:632-640.~~
- 31 ~~(41) Atkinson JM, Heritage J. Transcript notation. In: Atkinson JM, Heritage J, editors.~~  
32 ~~*Structures of Social Action: Studies in Conversation Analysis*. Cambridge: Cambridge~~  
33 ~~University Press; 1984. ix-xvi.~~
- 34 ~~(42) Jewitt C. Towards a multimodal analysis. *Technology, literacy and learning: a*~~  
35 ~~*multimodal approach*. Abingdon: Routledge; 2006. 32-52.~~
- 36 ~~(43) Goodwin C. Professional Vision. *American Anthropologist* 1994; 96(3):606-633.~~
- 37 ~~(44) Blommaert J. Sociolinguistic scales. *Working Papers in Urban Language &*~~  
38 ~~*Literacies*, Paper 37. Institute of Education; 2006.~~
- 39 ~~(45) Sarangi S, Slembrouck S. The pragmatics of information exchange in bureaucratic~~  
40 ~~discourse. In: Sarangi S, Slembrouck S, editors. *Language, Bureaucracy & Social*~~  
41 ~~*Control*. Harlow: Addison-Wesley Longman Limited; 1996. 17-35.~~

Formatted: Font: Italic, Do not check spelling or grammar

Formatted: Font: Italic, Do not check spelling or grammar

Formatted: Font: Italic, Do not check spelling or grammar

Formatted: Font: Italic, Do not check spelling or grammar

Formatted: Font: Italic, Do not check spelling or grammar

Formatted: Font: Italic, Do not check spelling or grammar

Formatted: Font: Italic, Do not check spelling or grammar

- 1  
2  
3  
4  
5  
6  
7  
8  
9  
10  
11  
12  
13  
14  
15  
16  
17  
18  
19  
20  
21  
22  
23  
24  
25  
26  
27  
28  
29  
30  
31  
32  
33  
34  
35  
36  
37  
38  
39  
40  
41  
42  
43  
44  
45  
46  
47  
48  
49  
50  
51  
52  
53  
54  
55  
56  
57  
58  
59  
60
- ~~(46) Roberts C, Esmail A, Sarangi S, Southgate L, Wakeford R, Wass V et al. Oral examinations—equal opportunities, ethnicity, and fairness in the MRCPG. *BMJ* 2000; 320:370.~~
- ~~(47) Wagner E, Austin B, Von Korff M. Organising care for patients with chronic illness. *Milbank Quarterly* 1996; 74(4):511-544.~~
- ~~(48) May C, Rapley T, Moreira T, Finch T, Heaven B. Technogovernance: Evidence, subjectivity, and the clinical encounter in primary care medicine. *Social Science & Medicine* 2006; 62:1022-1030.~~
- ~~(49) Department of Health. Liberating the Talents: Helping primary care trusts and nurses to deliver the NHS Plan. Downloadable from [http://www.dh.gov.uk/en/Publicationsandstatistics/Publications/PublicationsPolicyAndGuidance/DH\\_4007473\\_2002](http://www.dh.gov.uk/en/Publicationsandstatistics/Publications/PublicationsPolicyAndGuidance/DH_4007473_2002).~~
- ~~(50) Charles Jones H, Latimer J, May C. Transforming general practice: the redistribution of medical work in primary care. *Sociology of Health and Illness* 2003; 25(1):71-92.~~
- ~~(51) Bourdieu P. Outline of a Theory of Practice. Cambridge: Polity; 1977.~~
- ~~(52) Bourdieu P. The Logic of Practice. Cambridge: Polity; 1990.~~
- ~~(53) Goffman E. Involvement. Behavior in Public Places. New York: The Free Press; 1966. 33-42.~~
- ~~(54) Roberts C, Campbell S. Fitting stories into boxes: rhetorical and textual constraints on candidates' performances in British job interviews. *Journal of Applied Linguistics* 2005; 2(1):45-73.~~
- ~~(55) Douglas M. Institutions Do the Classifying. How Institutions Think. New York: Syracuse University Press; 1986. 91-109.~~
- ~~(56) Blommaert J. Choice and Determination. Discourse: Key topics in sociolinguistics. Cambridge: Cambridge University Press; 2005. 98-124.~~
- ~~(57) Blommaert J. Discourse. Cambridge: Cambridge University Press; 2005.~~
- ~~(58) Blommaert J, Collins J, Slembrouck S. Polycentricity and interactional regimes in "global neighbourhoods". *Ethnography* 2005; 6(2):205-235.~~
- ~~(59) Greenhalgh T, Swinglehurst D. Studying technology use as social practice: the untapped potential of ethnography. *BMC Medicine* 2011; 9:45.~~
- ~~(60) Geertz C. Thick Description: Toward an Interpretive Theory of Culture. The Interpretation of Cultures. New York: Basic Books; 1973. 3-30.~~
- ~~(61) Erickson F. Talk and Social Theory. Cambridge: Polity; 2004.~~
- ~~(62) Stake RE. Qualitative Case Studies. In: Denzin NK, Lincoln YS, editors. The Sage Handbook of Qualitative Research. 3rd ed. Sage Publications, Inc; 2005. 443-466.~~

**Formatted:** Font: Italic, Do not check spelling or grammar

**Formatted:** Font: Italic, Do not check spelling or grammar

**Formatted:** Font: Italic, Do not check spelling or grammar

**Formatted:** Font: Italic, Do not check spelling or grammar

**Formatted:** Font: Italic, Do not check spelling or grammar

**Formatted:** Font: Italic, Do not check spelling or grammar

**Formatted:** Font: Italic, Do not check spelling or grammar

**Formatted:** Left, Indent: Left: 0", Hanging: 0.5", Tab stops: 0.38", Right + 0.5", Left

## Reference List

- 1  
2  
3  
4  
5  
6  
7  
8  
9  
10  
11  
12  
13  
14  
15  
16  
17  
18  
19  
20  
21  
22  
23  
24  
25  
26  
27  
28  
29  
30  
31  
32  
33  
34  
35  
36  
37  
38  
39  
40  
41  
42  
43  
44  
45  
46  
47  
48  
49  
50  
51  
52  
53  
54  
55  
56  
57  
58  
59  
60
- (1) ~~Wagner E, Austin B, Von Korff M. Organising care for patients with chronic illness. *Milbank Quarterly* 1996; 74(4):511-544.~~
- (2) ~~Ham C. The ten characteristics of the high performing chronic care system. *Health Economics, Policy and Law* 2010; 5:71-90.~~
- (3) ~~Greenhalgh T, Potts HWW, Wong G, Bark P, Swinglehurst D. Tensions and Paradoxes in Electronic Patient Record Research: A Systematic Literature Review Using the Meta-narrative Method. *The Milbank Quarterly* 2009; 87(4):729-788.~~
- (4) ~~Black AD, Car J, Pagliari C, Anandan C, Cresswell K, Bokun T et al. The Impact of eHealth on the Quality & Safety of Health Care: A Systematic Overview. *PLoS Med* 2011; 8(1):e1000387.~~
- (5) ~~Monteiro E, Hepso. Purity and Danger of an Information Infrastructure. *Systemic Practice and Action Research* 2002; 15(2):145-167.~~
- (6) ~~Department of Health. Improving chronic disease management. Downloadable from [http://www.dh.gov.uk/prod\\_consum\\_dh/groups/dh\\_digitalassets/@dh/@en/document/s/digitalasset/dh\\_4075213.pdf](http://www.dh.gov.uk/prod_consum_dh/groups/dh_digitalassets/@dh/@en/document/s/digitalasset/dh_4075213.pdf). 2004.~~
- (7) ~~Singh D, Ham C. Improving care for people with long term conditions A review of UK and international management frameworks. Birmingham: NHS Institute for Innovation and Improvement; University of Birmingham; 2006.~~
- (8) ~~Berg M. Implementing information systems in health care organizations: myths and challenges. *International Journal of Medical Informatics* 2001; 64:143-156.~~
- (9) ~~General Practitioners Committee. Quality and Outcomes Framework. Guidance— Updated August 2004. Downloadable from [http://www.dh.gov.uk/prod\\_consum\\_dh/groups/dh\\_digitalassets/@dh/@en/document/s/digitalasset/dh\\_4088693.pdf](http://www.dh.gov.uk/prod_consum_dh/groups/dh_digitalassets/@dh/@en/document/s/digitalasset/dh_4088693.pdf). 2009.~~
- (10) ~~Nolte E, Knai C, McKee M. Managing chronic conditions: An introduction to the experience in eight countries. In: Nolte E, Knai C, McKee M, editors. *Managing chronic conditions*. European Observatory on Health Systems and Policies; 2008. 1-14.~~
- (11) ~~Guthrie B, Saultz JW, Freeman GK, Haggerty L. Continuity of care matters. *BMJ* 2008; 337:a867.~~
- (12) ~~Roland M, Campbell S, Bailey N, Whalley D, Sibbald B. Financial incentives to improve the quality of primary care in the UK: predicting the consequences of change. *Primary Health Care Research and Development* 2006; 7:18-26.~~
- (13) ~~Watt G. Blue sky research for primary care: A discussion paper. Downloadable from <http://www.sape.ac.uk/images/documents/blue.pdf>. Society for Academic Primary Care; 2011.~~

- 1  
2  
3  
4  
5  
6  
7  
8  
9  
10  
11  
12  
13  
14  
15  
16  
17  
18  
19  
20  
21  
22  
23  
24  
25  
26  
27  
28  
29  
30  
31  
32  
33  
34  
35  
36  
37  
38  
39  
40  
41  
42  
43  
44  
45  
46  
47  
48  
49  
50  
51  
52  
53  
54  
55  
56  
57  
58  
59  
60
- ~~-(14) Fortin M, Soubhi H, Hudon C, Bayliss E, van den Akker M. Multimorbidity's many challenges. *BMJ* 2007; 334.~~
  - ~~-(15) The NIHR School for Primary Care Research. See: [http://www.nihr.ac.uk/research/Pages/programmes\\_primary\\_care\\_research.aspx](http://www.nihr.ac.uk/research/Pages/programmes_primary_care_research.aspx); 2012.~~
  - ~~-(16) Rhodes P, Langdon M, Rowley E, Wright J, Small N. What Does the Use of a Computerized Checklist Mean for Patient Centred Care? The Example of a Routine Diabetes Review. *Qualitative Health Research* 2006; 16(3):353-376.~~
  - ~~-(17) McDonald R, Harrison S, Checkland K, Campbell S, Roland M. Impact of financial incentives on clinical autonomy and internal motivation in primary care: ethnographic study. *BMJ* 2007; 39239-890810.BE.~~
  - ~~-(18) Checkland K, McDonald R, Harrison S. Ticking Boxes and Changing the Social World: Data Collection and the New UK General Practice Contract. *Social Policy & Administration* 2007; 41(7):693-710.~~
  - ~~-(19) Edgar A. The expert patient: Illness as practice. *Medicine, Health Care and Philosophy* 2005; 8:165-171.~~
  - ~~-(20) Frank A. The Wounded Storyteller: Body, Illness, and Ethics. Chicago: University of Chicago Press; 1995.~~
  - ~~-(21) Kleinmann A. The illness narratives: suffering, healing and the human condition. New York: Basic Books; 1988.~~
  - ~~-(22) Strauss AL. Chronic illness and the quality of life. St. Louis: Mosby; 1975.~~
  - ~~-(23) Goffman E. Involvement. Behavior in Public Places. New York: The Free Press; 1966. 33-42.~~
  - ~~-(24) Berger J, Mohr J. A Fortunate Man; the Story of a Country Doctor. The Penguin Press; 1967.~~
  - ~~-(25) Heath I. The Mystery of General Practice. Nuffield Provincial Hospitals Trust, London; 1995.~~
  - ~~-(26) Charon R. Narrative Medicine: Form, Function, and Ethics. *Annals of Internal Medicine* 2001; 134(1):83-87.~~
  - ~~-(27) Greenhalgh T, Hurwitz B. Why study narrative? *BMJ* 1999; 318:48-50.~~
  - ~~-(28) Balint M. The Doctor, His Patient and the Illness. 2nd ed. Edinburgh: Churchill Livingstone; 1964.~~
  - ~~-(29) Heeks R, Mundy D, Salazar A. Why Health Care Information Systems Succeed or Fail. University of Manchester: Institute for Development Policy and Management; 1999.~~

- 1  
2  
3  
4  
5  
6  
7  
8  
9  
10  
11  
12  
13  
14  
15  
16  
17  
18  
19  
20  
21  
22  
23  
24  
25  
26  
27  
28  
29  
30  
31  
32  
33  
34  
35  
36  
37  
38  
39  
40  
41  
42  
43  
44  
45  
46  
47  
48  
49  
50  
51  
52  
53  
54  
55  
56  
57  
58  
59  
60
- ~~-(30) Berg M. Health care work and patient care information systems. *Health Information Management – integrating information technology in health care work*. 2004. 45-64.~~
  - ~~-(31) Swinglehurst D, Roberts C, Greenhalgh T. Opening up the "black box" of the electronic patient record: A linguistic ethnographic study in general practice. *Communication and Medicine* 2011; 8(1):3-15.~~
  - ~~-(32) Berg M. Of Forms, Containers, and the Electronic Medical Record: Some Tools for a Sociology of the Formal. *Science, Technology & Human Values* 1997; 22(4):403-433.~~
  - ~~-(33) Berg M. Practices of reading and writing: the constitutive role of the patient record in medical work. *Sociology of Health and Illness* 1996; 18(4):499-524.~~
  - ~~-(34) Timmermans S, Berg M. The gold standard: The challenge of evidence based medicine and standardization in health care. Philadelphia: Temple University Press; 2003.~~
  - ~~-(35) Swinglehurst D, Greenhalgh T, Myall M, Russell J. Ethnographic study of ICT-supported collaborative work routines in general practice. *BMC Health Serv Res* 2010; 10:348.~~
  - ~~-(36) Goffman E. Regions and Region Behaviour. *The Presentation of Self in Everyday Life*. London: Penguin Books; 1959. 109-140.~~
  - ~~-(37) Green J, Thorogood N. Qualitative Methods for Health Research. London, California, New Delhi: SAGE Publications Ltd; 2004.~~
  - ~~-(38) Rampton B, Tusting K, Maybin J, Barwell R, Creese A, Lytra V. UK Linguistic Ethnography: A discussion paper. Downloadable from <http://www.ling-ethnog.org.uk/documents/papers/ramptonetal2004.pdf>. 2004.~~
  - ~~-(39) Roberts C, Sarangi S. Theme-oriented discourse analysis of medical encounters. *Medical Education* 2005; 39:632-640.~~
  - ~~-(40) Atkinson JM, Heritage J. Transcript notation. In: Atkinson JM, Heritage J, editors. *Structures of Social Action: Studies in Conversation Analysis*. Cambridge: Cambridge University Press; 1984. ix-xvi.~~
  - ~~-(41) Jewitt C. Towards a multimodal analysis. *Technology, literacy and learning: a multimodal approach*. Abingdon: Routledge; 2006. 32-52.~~
  - ~~-(42) Goodwin C. Professional Vision. *American Anthropologist* 1994; 96(3):606-633.~~
  - ~~-(43) Blommaert J. Sociolinguistic scales. *Working Papers in Urban Language & Literacies, Paper 37*. Institute of Education; 2006.~~
  - ~~-(44) Sarangi S, Slembrouck S. The pragmatics of information exchange in bureaucratic discourse. In: Sarangi S, Slembrouck S, editors. *Language, Bureaucracy & Social Control*. Harlow: Addison-Wesley Longman Limited; 1996. 17-35.~~

- 1  
2  
3  
4  
5  
6  
7  
8  
9  
10  
11  
12  
13  
14  
15  
16  
17  
18  
19  
20  
21  
22  
23  
24  
25  
26  
27  
28  
29  
30  
31  
32  
33  
34  
35  
36  
37  
38  
39  
40  
41  
42  
43  
44  
45  
46  
47  
48  
49  
50  
51  
52  
53  
54  
55  
56  
57  
58  
59  
60
- ~~-(45) Roberts C, Esmail A, Sarangi S, Southgate L, Wakeford R, Wass V et al. Oral examinations—equal opportunities, ethnicity, and fairness in the MRCP. *BMJ* 2000; 320:370.~~
  - ~~-(46) May C, Rapley T, Moreira T, Finch T, Heaven B. Technogovernance: Evidence, subjectivity, and the clinical encounter in primary care medicine. *Social Science & Medicine* 2006; 62:1022-1030.~~
  - ~~-(47) Department of Health. Liberating the Talents: Helping primary care trusts and nurses to deliver the NHS Plan. Downloadable from [http://www.dh.gov.uk/en/Publicationsandstatistics/Publications/PublicationsPolicyAndGuidance/DH\\_4007473](http://www.dh.gov.uk/en/Publicationsandstatistics/Publications/PublicationsPolicyAndGuidance/DH_4007473). 2002.~~
  - ~~-(48) Charles Jones H, Latimer J, May C. Transforming general practice: the redistribution of medical work in primary care. *Sociology of Health and Illness* 2003; 25(1):71-92.~~
  - ~~-(49) Bourdieu P. Outline of a Theory of Practice. Cambridge: Polity; 1977.~~
  - ~~-(50) Bourdieu P. The Logic of Practice. Cambridge: Polity; 1990.~~
  - ~~-(51) Roberts C, Campbell S. Fitting stories into boxes: rhetorical and textual constraints on candidates' performances in British job interviews. *Journal of Applied Linguistics* 2005; 2(1):45-73.~~
  - ~~-(52) Douglas M. Institutions Do the Classifying. How Institutions Think. New York: Syracuse University Press; 1986. 91-109.~~
  - ~~-(53) Blommaert J. Choice and Determination. Discourse: Key topics in sociolinguistics. Cambridge: Cambridge University Press; 2005. 98-124.~~
  - ~~-(54) Blommaert J. Discourse. Cambridge: Cambridge University Press; 2005.~~
  - ~~-(55) Blommaert J, Collins J, Slembrouck S. Polycentricity and interactional regimes in "global neighbourhoods". *Ethnography* 2005; 6(2):205-235.~~
  - ~~-(56) Greenhalgh T, Swinglehurst D. Studying technology use as social practice: the untapped potential of ethnography. *BMC Medicine* 2011; 9:45.~~
  - ~~-(57) Geertz C. Thick Description: Toward an Interpretive Theory of Culture. The Interpretation of Cultures. New York: Basic Books; 1973. 3-30.~~
  - ~~-(58) Erickson F. Talk and Social Theory. Cambridge: Polity; 2004.~~
  - ~~-(59) Stake RE. Qualitative Case Studies. In: Denzin NK, Lincoln YS, editors. The Sage Handbook of Qualitative Research. 3rd ed. Sage Publications, Inc; 2005. 443-466.~~

1  
2  
3  
4  
5  
6  
7  
8  
9  
10  
11  
12  
13  
14  
15  
16  
17  
18  
19  
20  
21  
22  
23  
24  
25  
26  
27  
28  
29  
30  
31  
32  
33  
34  
35  
36  
37  
38  
39  
40  
41  
42  
43  
44  
45  
46  
47  
48  
49  
50  
51  
52  
53  
54  
55  
56  
57  
58  
59  
60

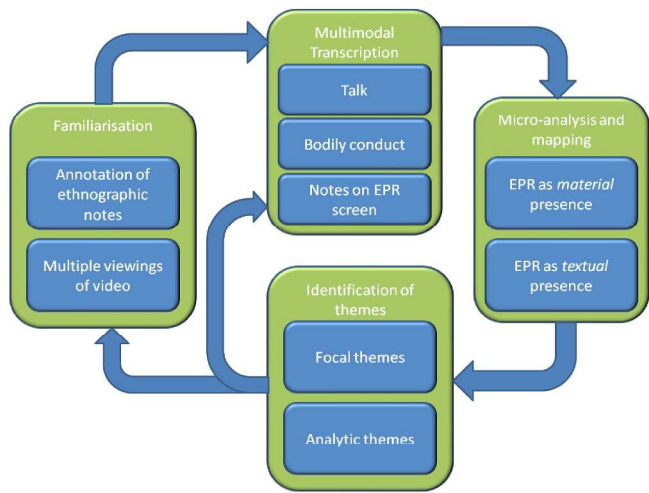

Figure 1. Approach to transcription and analysis

215x279mm (300 x 300 DPI)



**Box 1. Framing the purpose of the chronic disease management clinic (ethnographic fieldnotes)**

A frail-looking 86 year old man struggled in to the clinic, barely able to walk. He was very deaf. He hung his walking stick over his chair and grimaced as he sat down, looking as if he was in pain. The nurse said loudly "We've called you in to look at you from the heart point of view. I know you have a lot of other things going on but we've called you in to look at your heart." She then asked "How often do you use the angina tablet under your tongue?" The patient replied in a way which made his most pressing concern clear: "Not much...for the simple reason that I can only crawl like a tortoise"  
Nurse: "and the simvastatin?"  
Patient: "no...I stopped that. I think it's giving me diarrhoea. These hearing aids are not very good you know. I've had it adjusted several times but I'm really disappointed. I had hoped for better than this"

For review only

**Box 2. Constructing patienthood in the asthma clinic (ethnographic fieldnotes)**

Sam, a lively 2-year-old came with his mum. He ran excitedly around the clinic room investigating every corner. His mum seemed exasperated and said she was not getting far with his treatment, a plastic "spacer" device to which the "pumps" were attached. The boy's dad and grandparents were asthmatic, but Sam only saw his dad occasionally at weekends these days.

The nurse explained that the diagnosis of asthma cannot be certain in a 2-year-old. Things might be clearer by the time he was about 4. His mum was obviously relieved to know that it was not a definite thing. She was very anxious that her ex-partner wouldn't know how to look after her son when he goes to visit. She asked "There's nothing I could have done to stop him getting it, is there?" The nurse explained it was not her fault and did what she could to be reassuring. She explained what the different inhalers do...

The nurse pointed towards the computer, saying that she was going to make some notes. She completed the template line by line and there was no talking for several minutes. Sam ran towards the door and started rattling the door handle, but his mum said firmly "NO...you've got to wait for the lady to finish her typing".

The nurse handed over a prescription and they left.

The EPR consisted of a collection of Read coded entries with some limited free text alongside:

*Never smoked tobacco*

*Inhaler technique moderate*

*Inhaler technique shown (needs to commence low dose ICS. I will monitor)*

*Symptoms occur at night (7/7)*

*Asthma limiting activities*

*Asthma management plan*

*Asthma compliance satisfactory (needs ICS)*

*Asthma daytime symptoms (consistent cough)*

*Asthma medication review*

*Asthma monitoring check done*

*Follow up asthma assessment (date)*

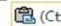

ew only
